# Supplementary material for: Cyclic di-GMP as an antitoxin regulates bacterial genome stability and antibiotic persistence in biofilms
Source: eLife journal article supplement (doi:10.7554/elife.99194), 2024-08-06

Figure 5B

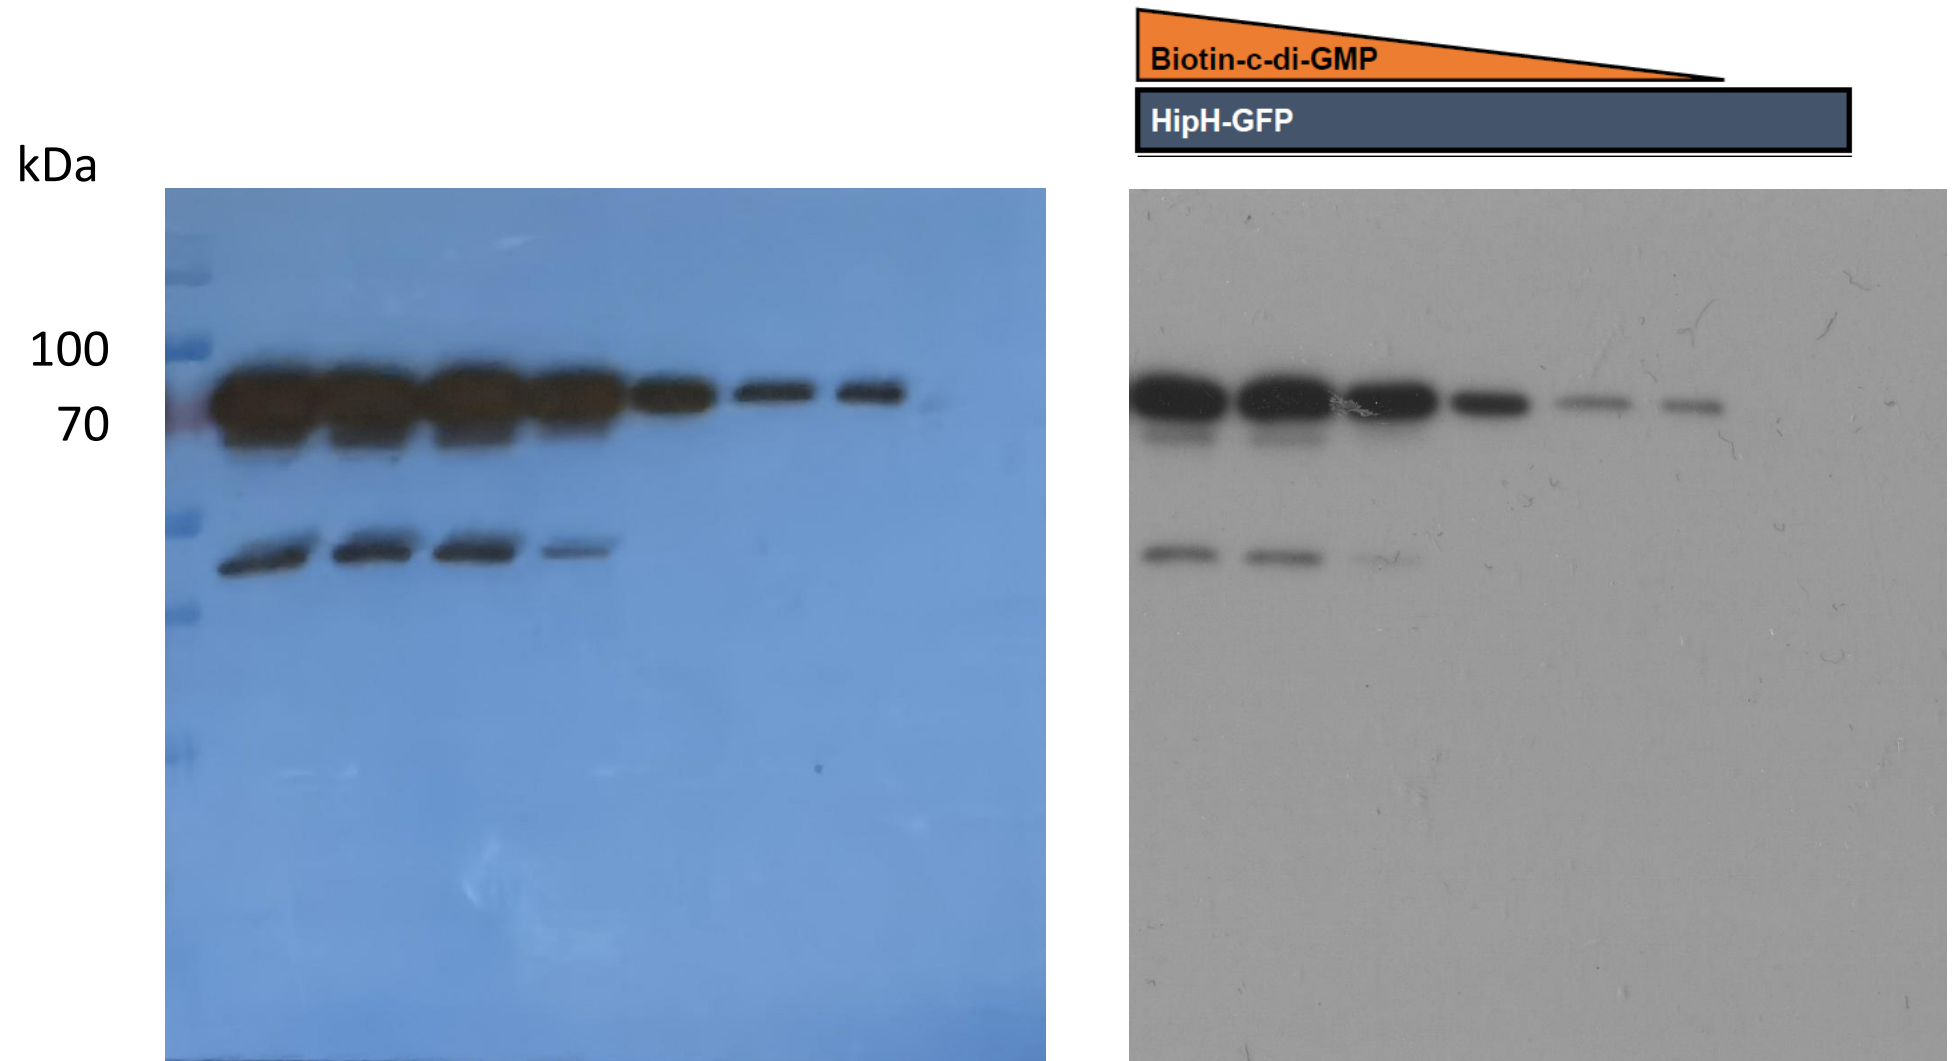

Figure 5C

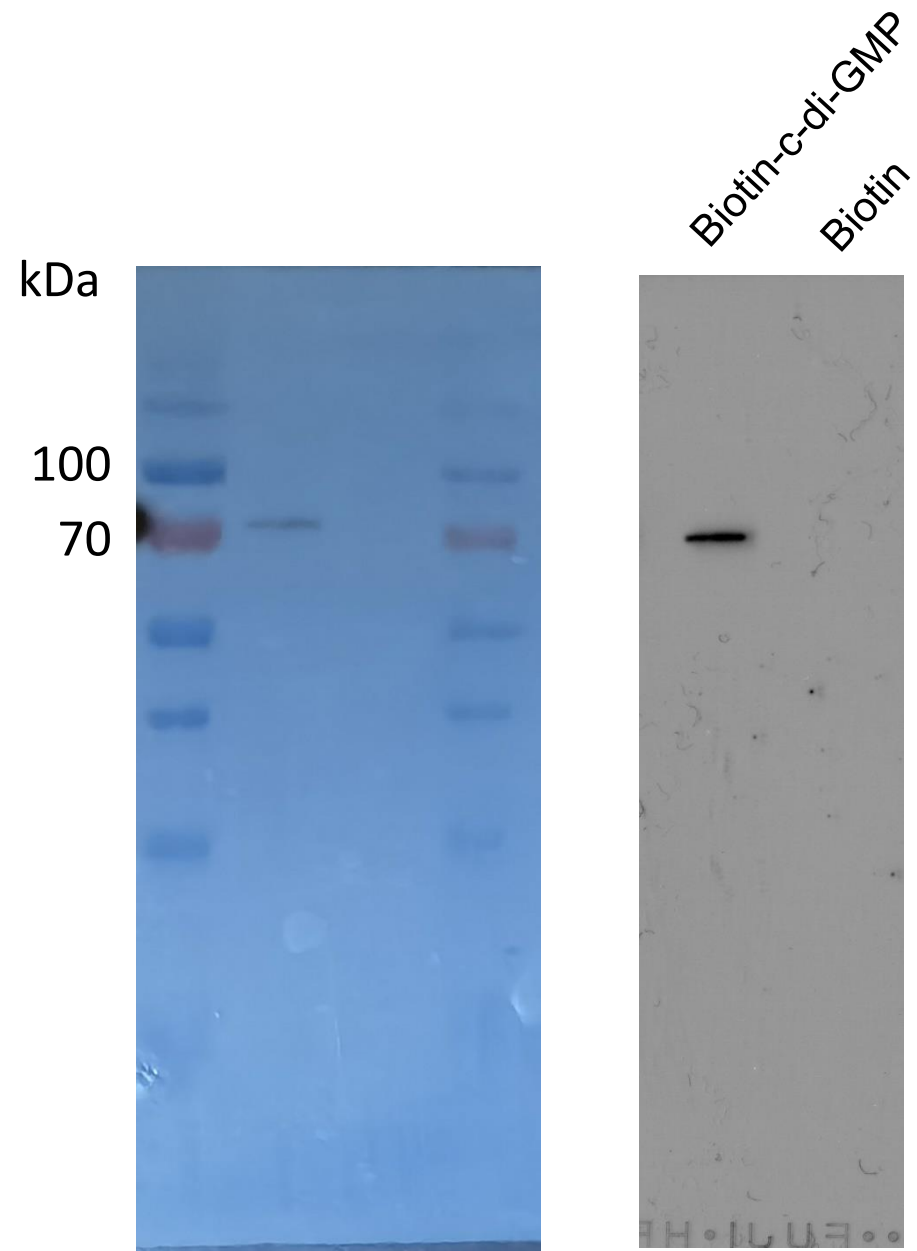

Figure 5D

kDa

100  
70  
55  
40  
35  
25

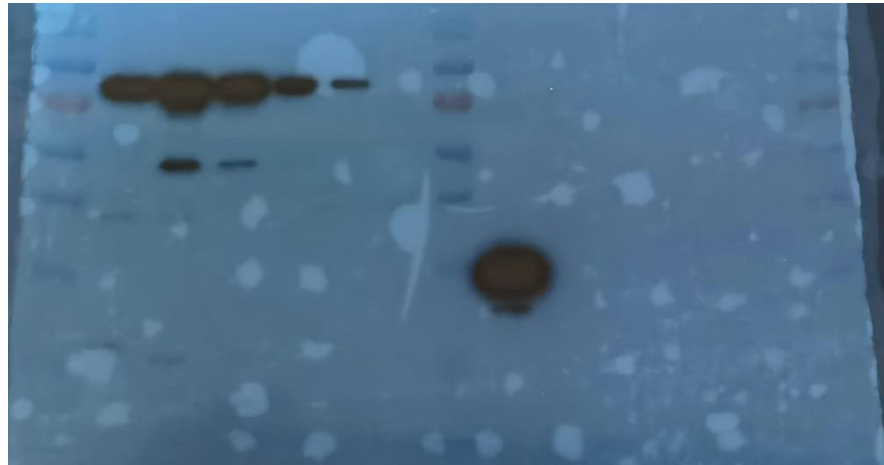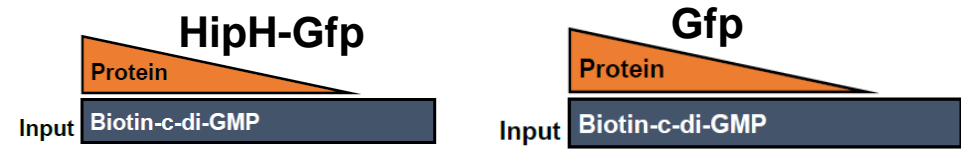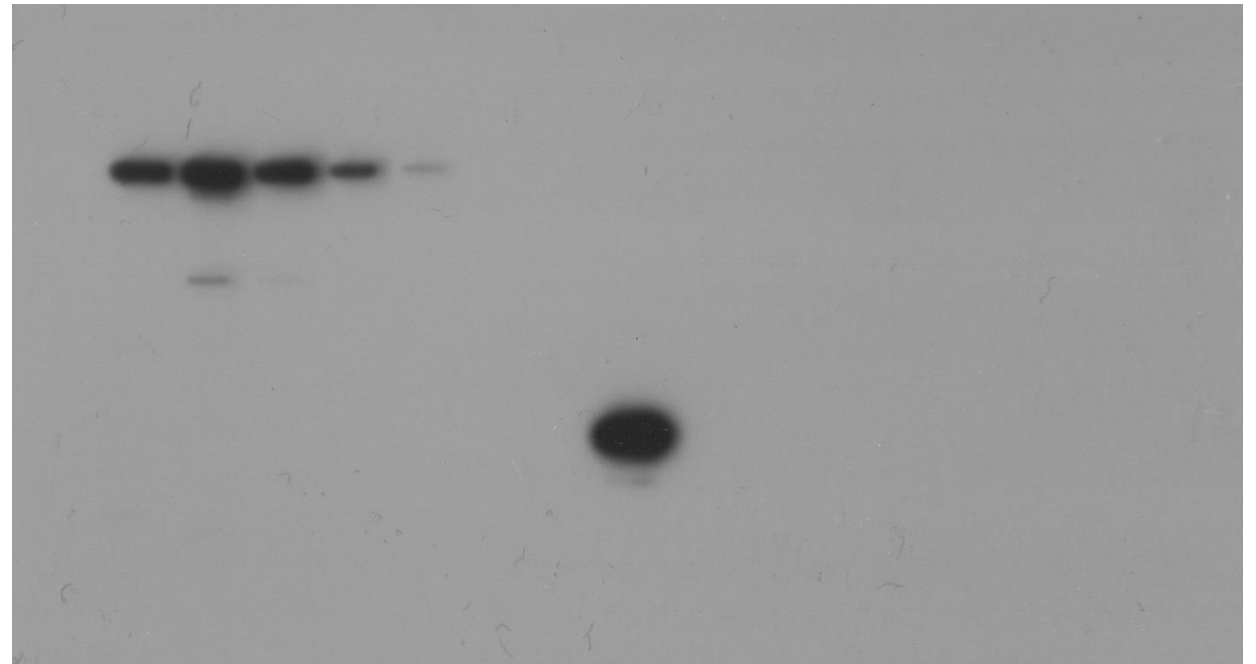

Figure 5E

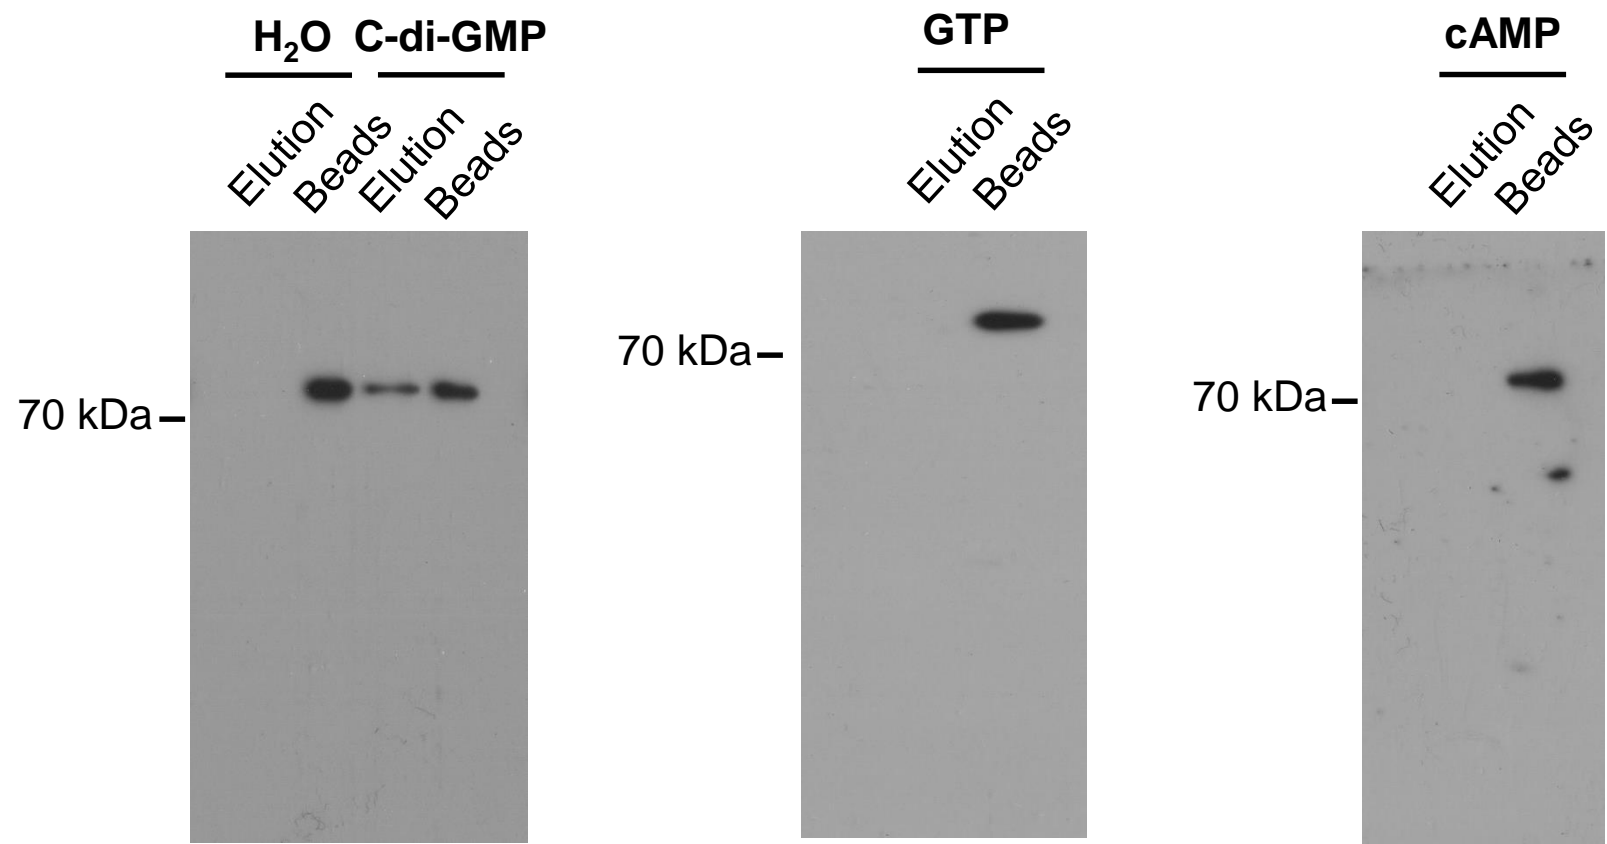

Supplement: fig5-data1 [file elife-99194-fig5-data1-v1.pdf]
