# Supplementary material for: Cyclic di-GMP as an antitoxin regulates bacterial genome stability and antibiotic persistence in biofilms
Source: eLife journal article supplement (doi:10.7554/elife.99194), 2024-08-06

Figure 5—figure supplement 1A

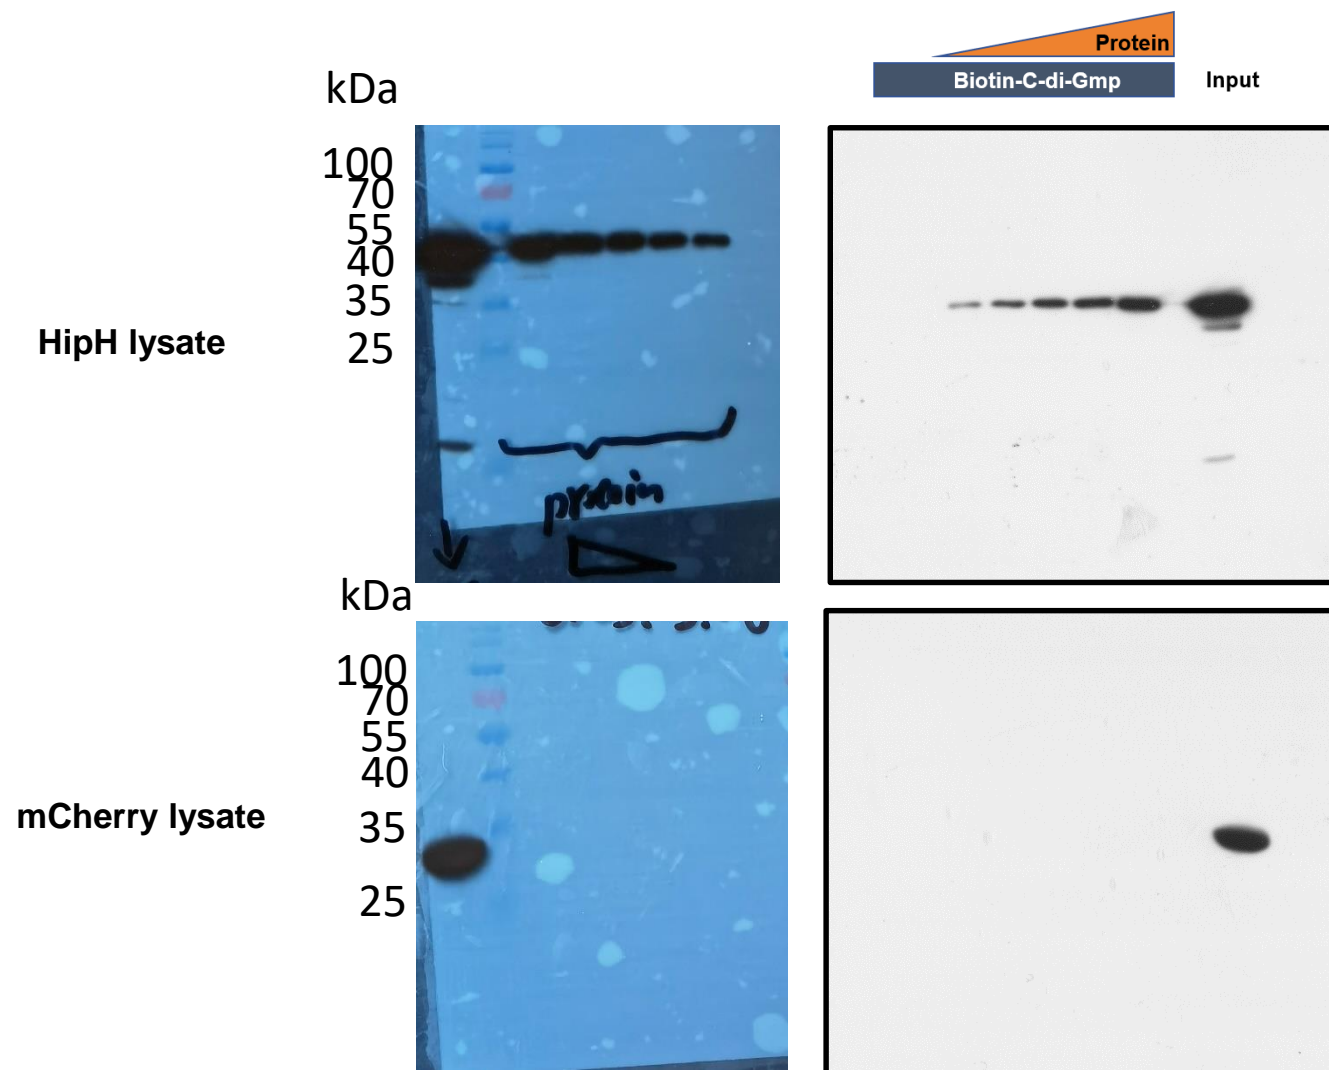

Figure 5—figure supplement 1B

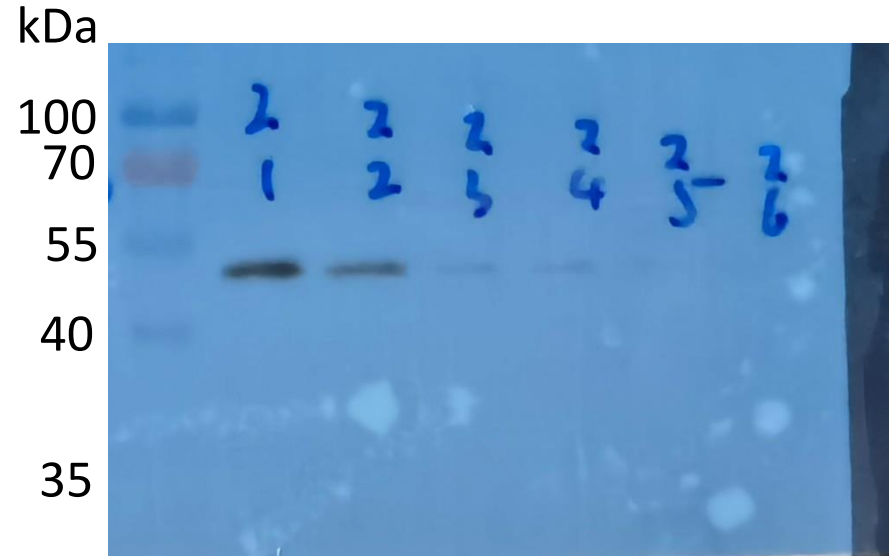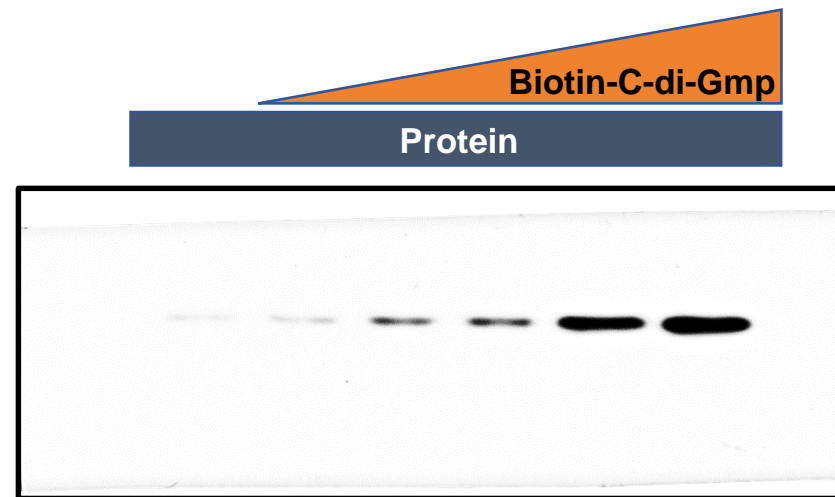

Supplement: fig5-figsupp1-data1 [file elife-99194-fig5-figsupp1-data1-v1.pdf]
