# Supplementary material for: Cyclic di-GMP as an antitoxin regulates bacterial genome stability and antibiotic persistence in biofilms
Source: eLife. 2024 Oct 4;13:RP99194. doi: 10.7554/eLife.99194 (PMC11452175; doi:10.7554/eLife.99194)
Supplement: Figure 1—source data 1. [file elife-99194-fig1-data1.xlsx]

## Sheet: Fig. 1B
											static culture 0.5 h, adherent cells
Left panel							two-tailed Student’s t test			Right panel	c-di-GMP sensor R-1 score	cells ratio
	static culture 0.5 h, survival ratio (log 10)						adherent vs planktonic				0.1	0
killing time (h)	planktonic 1	planktonic 2	planktonic 3	adherent 1	adherent 2	adherent 3	P Value	Summary			0.2	0
0	0	0	0	0	0	0	N/A	N/A			0.3	0
1	-3.01336	-3	-3.11539	-2.97367	-2.82391	-2.97285	0.125	ns			0.4	0
1.5	-3.52288	-3.54711	-3.09691	-3.11941	-3.42101	-3.39169	0.6692	ns			0.5	0.04059
3	-4.69897	-4.58039	-4.43573	-4.53991	-4.74639	-5.08552	0.2817	ns			0.6	0.247232
4.5	-5.01336	-5.01022	-4.77815	-4.97564	-5.11998	-5.27458	0.1695	ns			0.7	0.490775
6	-5.47712	-5.14211	-4.98576	-5.17194	-5.4624	-5.53782	0.3664	ns			0.8	0.154982
											0.9	0.04797
											1	0.01476
											1.1	0.00369
											1.2	0
											1.3	0
											1.4	0
											1.5	0
											1.6	0
											1.7	0
											1.8	0
											1.9	0
											2	0
											2.1	0
											2.2	0
											2.3	0
											2.4	0
											2.5	0

## Sheet: Fig. 1C
											static culture 2 h, adherent cells
Left panel							two-tailed Student’s t test			Right panel	c-di-GMP sensor R-1 score	cells ratio
	static culture 2 h, survival ratio (log 10)						adherent vs planktonic				0.1	0
killing time (h)	planktonic 1	planktonic 2	planktonic 3	adherent 1	adherent 2	adherent 3	P Value	Summary			0.2	0
0	0	0	0	0	0	0	N/A	N/A			0.3	0
1	-2.98494	-3.23195	-2.89963	-2.3647	-2.64345	-2.63071	0.0218	*			0.4	0
1.5	-3.73629	-3.5917	-3.68825	-2.99024	-3.12057	-3.28293	0.0046	**			0.5	0
3	-5.587	-4.99258	-5.07572	-4	-4.08715	-4.27416	0.0056	**			0.6	0.015075
4.5	-5.34964	-5.68425	-5.76955	-4.56427	-4.81954	-4.93174	0.0079	**			0.7	0.077889
6	-5.92942	-5.88837	-5.76955	-4.79835	-4.77815	-5.19498	0.0027	**			0.8	0.168342
											0.9	0.183417
											1	0.198492
											1.1	0.165829
											1.2	0.100503
											1.3	0.040201
											1.4	0.030151
											1.5	0.005025
											1.6	0.012563
											1.7	0.002513
											1.8	0
											1.9	0
											2	0
											2.1	0
											2.2	0
											2.3	0
											2.4	0
											2.5	0

## Sheet: Fig. 1D
											static culture 3.5 h, adherent cells
Left panel							two-tailed Student’s t test			Right panel	c-di-GMP sensor R-1 score	cells ratio
	static culture 3.5 h, survival ratio (log 10)						adherent vs planktonic				0.1	0
killing time (h)	planktonic 1	planktonic 2	planktonic 3	adherent 1	adherent 2	adherent 3	P Value	Summary			0.2	0
0	0	0	0	0	0	0	N/A	N/A			0.3	0
1	-1.96221	-1.99045	-1.95609	-1.89395	-1.57403	-1.94023	0.2177	ns			0.4	0
1.5	-2.8046	-2.93721	-2.90125	-2.63071	-2.37446	-2.58121	0.0171	*			0.5	0
3	-4.56427	-4.69897	-4.28293	-3.64069	-3.31079	-3.50658	0.0028	**			0.6	0
4.5	-5.31101	-5.19081	-5.26556	-4.20597	-4	-4.15186	<0.0001	****			0.7	0
6	-5.24551	-5.75012	-5.52597	-4.34988	-3.89354	-4.40512	0.0041	**			0.8	0.055851
											0.9	0.074468
											1	0.114362
											1.1	0.138298
											1.2	0.140957
											1.3	0.117021
											1.4	0.106383
											1.5	0.085106
											1.6	0.058511
											1.7	0.031915
											1.8	0.029255
											1.9	0.018617
											2	0.021277
											2.1	0.007979
											2.2	0
											2.3	0
											2.4	0
											2.5	0

## Sheet: Fig. 1F
							two-tailed Student’s t test
	static culture 24 h, persister ratio (log 10)						adherent vs planktonic
	planktonic 1	planktonic 2	planktonic 3	adherent 1	adherent 2	adherent 3	P Value	Summary
MG1655	-3.55414	-4.40577	-4.17609	-3.04139	-3.22724	-3.24304	0.029	*
UPEC16	-3.50864	-3.66679	-3.84873	-2.62434	-2.69897	-1.96524	0.0079	**

## Sheet: Fig. 1H
								two-tailed Student’s t test
c-di-GMP level, persister ratio (log 10)								Low vs High
Low 1	Low 2	Low 3	Low 4	High 1	High 2	High 3	High 4	P Value	Summary
-3.23363	-2.71391	-2.76669	-3.52504	-2.19382	-2.16671	-2.03218	-1.88482	0.0015	**
