# Supplementary material for: Cyclic di-GMP as an antitoxin regulates bacterial genome stability and antibiotic persistence in biofilms
Source: eLife. 2024 Oct 4;13:RP99194. doi: 10.7554/eLife.99194 (PMC11452175; doi:10.7554/eLife.99194)
Supplement: Figure 2—source data 1. [file elife-99194-fig2-data1.xlsx]

## Sheet: Fig. 2B
pdeH overexpression adherent cells
c-di-GMP sensor R-1 score	cells ratio
0.1	0
0.2	0
0.3	0
0.4	0
0.5	0
0.6	0.094037
0.7	0.238532
0.8	0.295872
0.9	0.194954
1	0.09633
1.1	0.038991
1.2	0.011468
1.3	0.020642
1.4	0.004587
1.5	0.004587
1.6	0
1.7	0
1.8	0
1.9	0
2	0
2.1	0
2.2	0
2.3	0
2.4	0
2.5	0

## Sheet: Fig. 2C
vector overexpression adherent cells
c-di-GMP sensor R-1 score	cells ratio
0.1	0
0.2	0
0.3	0
0.4	0
0.5	0.004283
0.6	0.014989
0.7	0.051392
0.8	0.139186
0.9	0.1606
1	0.169165
1.1	0.194861
1.2	0.134904
1.3	0.059957
1.4	0.021413
1.5	0.012848
1.6	0.017131
1.7	0.012848
1.8	0.006424
1.9	0
2	0
2.1	0
2.2	0
2.3	0
2.4	0
2.5	0

## Sheet: Fig. 2D
										two-tailed Student’s t test			two-tailed Student’s t test
	adherent cells induced by arabinose, survival ratio (log 10)									vector vs pdeH			vector vs dgcZ
killing time (h)	vector 1	vector 2	vector 3	pdeH 1	pdeH 2	pdeH 3	dgcZ 1	dgcZ 2	dgcZ 3	P Value	Summary		P Value	Summary
0	0	0	0	0	0	0	0	0	0	N/A	N/A		N/A	N/A
1.5	-2.63745	-2.53565	-2.52904	-2.85158	-3.0086	-2.53867	-1.94675	-1.91217	-2.05344	0.1785	ns		0.0004	***
3	-3.17704	-3.11869	-3.29981	-3.91948	-4.12211	-3.81117	-2.55015	-2.49861	-2.59033	0.0021	**		0.0004	***
4.5	-3.54881	-3.384	-3.64714	-3.91285	-4.26041	-3.97004	-2.73848	-2.54332	-2.81936	0.0169	*		0.0018	**

## Sheet: Fig. 2E
dgcZ overexpression adherent cells
c-di-GMP sensor R-1 score	cells ratio
0.1	0
0.2	0
0.3	0
0.4	0
0.5	0
0.6	0
0.7	0
0.8	0
0.9	0
1	0.005495
1.1	0.008242
1.2	0.010989
1.3	0.035714
1.4	0.052198
1.5	0.112637
1.6	0.104396
1.7	0.153846
1.8	0.14011
1.9	0.068681
2	0.082418
2.1	0.071429
2.2	0.065934
2.3	0.041209
2.4	0.027473
2.5	0.019231
