# Supplementary material for: Cyclic di-GMP as an antitoxin regulates bacterial genome stability and antibiotic persistence in biofilms
Source: eLife. 2024 Oct 4;13:RP99194. doi: 10.7554/eLife.99194 (PMC11452175; doi:10.7554/eLife.99194)
Supplement: Figure 3—figure supplement 1—source data 1. [file elife-99194-fig3-figsupp1-data1.xlsx]

## Sheet: Fig. 3- figure supplement 1A
IBC count per slide			two-tailed Student’s t test
WT	ΔhipH		WT vs ΔhipH
10	13		P Value	Summary
11	11		0.6612	ns
50	23
3	13
11	2
0	1
