# Supplementary material for: Cyclic di-GMP as an antitoxin regulates bacterial genome stability and antibiotic persistence in biofilms
Source: eLife. 2024 Oct 4;13:RP99194. doi: 10.7554/eLife.99194 (PMC11452175; doi:10.7554/eLife.99194)
Supplement: Figure 3—source data 1. [file elife-99194-fig3-data1.xlsx]

## Sheet: Fig. 3A
persister ratio (log 10)			two-tailed Student’s t test			two-tailed Student’s t test
vector	dgcZ	dgcZ-m	vector vs dgcZ			dgcZ vs dgcZ-m
-4.75696	-1.55175	-4.69897	P Value	Summary		P Value	Summary
-4.84239	-1.4781	-4.30103	<0.0001	****		<0.0001	****
-4.63085	-1.54115	-4.44141

## Sheet: Fig. 3C
Left panel	persister ratio (log10)				Right panel	persister ratio (log10)			two-tailed Student’s t test
	pBAD::vector					pBAD::dgcZ			WT vs ΔhipH
	WT	ΔhipA	ΔhipH			WT	ΔhipA	ΔhipH	P Value	Summary
	-4.57936	-4.27522	-3.99766			-2.16386	-2.24055	-3.2769	<0.0001	****
	-4.24304	-4.16695	-3.79296			-2.04347	-2.27522	-3.2703
	-4.64572	-4.29614	-3.57254			-1.92082	-2.4921	-3.35715
	-4.4208	-4.12494	-4.00235			-2.28255	-2.1111	-3.40314	two-tailed Student’s t test
	-4.39794	-4.30952	-3.70952			-2.44494	-2.33234	-3.24073	WT vs ΔhipA
	-4.7253	-4.37905	-4.05648			-2.24598	-2.36898	-3.66455	P Value	Summary
	-3.74008	-4.30482	-3.80371			-2.14613	-2.16435	-3.1514	0.062	ns
	-3.81502	-3.96069	-3.68318			-1.72379	-2.13703	-3.12241
	-4.05061	-3.98494	-3.63973			-1.75012	-2.22578	-3.20076

## Sheet: Fig. 3E
biofilm in vitro, persister ratio (log 10)		two-tailed Student’s t test
UPEC16 WT	UPEC16 ΔhipH	WT vs ΔhipH
-2.43366	-3.26627	P Value	Summary
-2.51188	-3.19189	0.0082	**
-2.1347	-2.91568

## Sheet: Fig. 3F
IBC in vivo, persister ratio (log 10)		two-tailed Student’s t test
UPEC16 WT	UPEC16 ΔhipH	WT vs ΔhipH
-3.06695	-3.38694	P Value	Summary
-3	-3.05271	0.0262	*
-3.05799	-2.81548
-2.03572	-2.85733
-1.66901	-3.33244
-3.46073	-2.92942
-2.29306	-3.11394
-3.13988	-2.53927
-2.0607	-3.77546
	-4.42597
	-3.94885

## Sheet: Fig. 3G
Relative mRNA level of hipH			two-tailed Student’s t test			two-tailed Student’s t test
vector	dgcZ	dgcZ-m	vector vs dgcZ			dgcZ vs dgcZ-m
0.795536	11.7942	1.00696	P Value	Summary		P Value	Summary
5.6962	14.5203	0.952638	0.0046	**		0.0002	***
1	12.2101	1.1487

## Sheet: Fig. 3H
Fluorescence intensity of HipH-Bfp
vector	dgcZ
178.529	392.014
119.934	480.599
116.774	632.273
89.0791	639.762
79.0386	402.819
91.0988	668.226
96.2903	650.618
155.871	549.889
181.433	450.678
103.038	383.569
204.818	804
105.083	740.394
106.283	816.03
123.263	500.563
160.032	838.612
123.837	533.254
103.244	736.374
165.266	870.534
129.607	964.918
133.896	949.077
134.728	650.019
88.717	497.959
133.164	847.915
124.382	815.597
103.397	1227.47
118.652	601.352
114.182	580.763
194.831	521.389
163.032	559.862
126.981	252.129
264.928	602.501
167.248	481.354
81.1103	384.168
99.8426	677.677
138.227	570.005
120.813	799.664
118.659	481.333
147.04	587.618
149.119	625.144
106.039	853.022
93.6565	769.686
148.096	914.262
248.779	559.883
157.785	1159.22
139.185	542.663
128.607	932.716
109.371	742.695
120.796	922.401
109.692	557.641
151.449	1021.63
151.99	850.923
126.6	660.394
110.889	577.017
116.624	821.592
131.791	769.295
115.452	645.218
86.3425	466.65
97.0301	794.779
79.0553	1699.23
67.4555	1196.89
63.8058	368.612
102.243	715.514
73.0669	820.654
122.87	331.738
53.4032	477.831
93.3619	506.885
66.1292	574.61
134.798	524.243
112.888	585.255
94.0443	721.976
108.934	417.704
80.4979	910.82
71.4239	512.086
82.8348	835.326
93.8912	977.638
87.5775	351.52
121.961	601.349
82.9188	599.231
121.686	660.284
47.7513	739.509
81.0619	810.829
67.192	991.065
138.656	387.653
58.8345	657.249
88.5251	603.742
209.001	501.585
113.248	525.644
107.702	775.733
112.245	866.076
58.8917	565.413
49.4492	679.053
60.2971	650.414
62.0344	941.674
36.1855	1750.96
46.9588	1151.55
34.7105	852.388
64.653	854.937
40.7744	1199.63
55.1783	861.1
70.5845	855.355
68.6371	1048.09
62.5284	1006.53
49.3587	937.243
54.2455	572.008
59.5603	675.1
81.4269	1491.81
84.104	1139.34
97.8053	1486.8
99.6091	809.97
109.518	1336.16
85.8688	1336.73
70.6925	562.033
81.2018	550.384
95.5697	656.81
68.214	646.113
80.9546	669.75
51.7799	847.147
75.6114	618.335
120.753	618.613
130.833	572.466
128.4	1489.86
89.3693	770.287
71.2703	1254.39
79.4111	1277.43
44.3491	586.044
93.7458	480.93
121.362	519.807
89.7486	743.514
87.4991	397.139
114.145	702.19
116.611	752.576
125.996	655.468
83.8431	1254.38
128.607	1162.67
76.7916	900.443
103.795	502.784
154.82	1137.11
103.862	702.351
131.901	1280.45
78.9556	577.139
105.339	619.954
118.534	894.761
124.231	701.197
106.881	1095.93
62.7834	609.404
127.213	499.878
122.572	575.155
115.159	572.506
109.497	614.727
104.344	881.315
93.4789	685.562
135.29	834.787
76.3591	864.946
134.507	512.402
182.684	359.199
100.419	419.444
102.704	635.129
131.825	676.452
55.8886	750.259
134.87	363.504
91.5565	674.627
79.6051	1123.53
114.294	579.035
89.3799	625.698
88.0056	846.278
87.5594	616.209
102.699	416.478
99.4853	371.158
101.272	1231.64
84.3665	495.432
104.391	456.978
131.585	794.243
132.931	430.081
97.5483	735.705
128.903	1061.41
201.543	1267.67
137.535	494.128
158.679	691.631
102.955	588.557
127.755	509.82
121.704	1607.31
160.177	616.837
233.273	617.076
124.026	935.266
177.781	660.563
163.209	408.108
80.7144	1336.16
99.2148	580.557
89.7639	662.891
112.257	781.873
95.4014	601.048
85.6191	638.32
122.274	537.584
139.034	558.407
110.037	631.356
127.319
117.627
137.671
129.847
72.3378
160.711
95.7409
120.528
98.7287
124.429
160.722

## Sheet: Fig. 3I
Cells with growth potentital (%)				Two-way ANOVA			Two-way ANOVA
Vector	hipH	hipH+dosC	hipH+dgcZ	hipH vs hipH+dosC			hipH vs hipH+dgcZ
1279.41	5.09804	34.6667	91.2281	P Value	Summary		P Value	Summary
1077.92	13.1429	44.4444	59.5745	0.028	*		0.0342	*
2098.36	11.0345	28.2051	102.326

## Sheet: Fig. 3J
Death cells ratio (%)
Vector	hipH	hipH+dosC	hipH+dgcZ
0	15.5642	2.05607	1.26582
0	17.1271	1.88235	1.17371
0	21.0247	2.45098	2.10526
VBNC ratio (%)
Vector	hipH	hipH+dosC	hipH+dgcZ
0	79.3378	63.2773	7.50611
0	69.7301	53.6732	39.2518
0	67.9408	69.3439	0
				Ratio of VBNC and death cells
Ratio of VBNC and death cells (%)				Two-way ANOVA			Two-way ANOVA
Vector	hipH	hipH+dosC	hipH+dgcZ	hipH vs hipH+dosC			hipH vs hipH+dgcZ
0	94.902	65.3333	8.77193	P Value	Summary		P Value	Summary
0	86.8571	55.5556	40.4255	0.028	*		0.0318	*
0	88.9655	71.7949	2.10526

## Sheet: Fig. 3K
persister ratio (log 10)				two-tailed Student’s t test			two-tailed Student’s t test
Vector	hipH	hipH+dosC	hipH+dgcZ	hipH vs hipH+dosC			hipH vs hipH+dgcZ
-3.81548	-3.54921	-2.52481	-2.24	P Value	Summary		P Value	Summary
-4.20525	-3.52703	-2.98111	-2.94946	0.0057	**		0.012	*
-3.84481	-3.49236	-2.84913	-2.21186
