# Supplementary material for: Cyclic di-GMP as an antitoxin regulates bacterial genome stability and antibiotic persistence in biofilms
Source: eLife. 2024 Oct 4;13:RP99194. doi: 10.7554/eLife.99194 (PMC11452175; doi:10.7554/eLife.99194)
Supplement: Figure 4—figure supplement 1—source data 1. [file elife-99194-fig4-figsupp1-data1.xlsx]

## Sheet: Fig. 4- figure supplement 1A
Cell length (μm)			two-tailed Student’s t test
Vector	hipH		vector vs hipH
2.189	3.923		P Value	Summary
2.489	2.711		<0.0001	****
2.488	3.108
2.153	3.194
1.629	5.26
2.153	2.959
1.921	3.792
2.912	2.592
2.874	3
1.988	4.111
1.847	2.75
2.609	3.465
2.222	1.96
2.237	1.636
1.994	3.26
2.992	2.884
2.053	4.113
1.868	4.56
2.03	4.882
1.813	3.582
2.324	3.315
1.907	2.422
2.044	3.99
2.747	3.006
1.957	3.11
1.442	2.882
2.762	3.098
1.781	4.498
1.653	3.581
1.881	2.701
1.95	2.6
2.531	2.92
2.256	2.983
2.825	3.225
1.64	2.621
1.947	3.502
1.559	2.158
2.423	2.614
2.163	2.519
1.808	2.431
1.655	3.325
1.623	3.304
1.988	2.683
2.921	2.523
2.259	2.429
1.764	3.84
3.123	2.552
2.409	2.57
3.138	3.26
1.946	2.554
2.206	1.707
1.591	2.368
1.496	1.65
2.292	1.5
1.76	1.666
2.098	2.041
1.72	2.404
2.417
1.659
2.717
2.229
2.005
2.466
2.431
1.908
2.036
2.185
2.482
1.882
1.683
2.125
2.615
1.943
1.993
1.784
2.346
2.474
1.722
1.614

## Sheet: Fig. 4- figure supplement 1B
recA	Relative mRNA level			two-tailed Student’s t test			two-tailed Student’s t test
	vector	hipH	hipH-ΔHTH	vector vs hipH			hipH-ΔHTH vs hipH
	1	19.4271	0.76313	P Value	Summary		P Value	Summary
	1.1019	21.7057	0.835088	<0.0001	****		<0.0001	****
	1.21419	19.6983	0.920188
sulA	Relative mRNA level			two-tailed Student’s t test			two-tailed Student’s t test
	vector	hipH	hipH-ΔHTH	vector vs hipH			hipH-ΔHTH vs hipH
	1	106.153	1.26576	P Value	Summary		P Value	Summary
	0.946058	126.238	1.1019	<0.0001	****		<0.0001	****
	1.02101	108.383	1.26576
tisB	Relative mRNA level			two-tailed Student’s t test			two-tailed Student’s t test
	vector	hipH	hipH-ΔHTH	vector vs hipH			hipH-ΔHTH vs hipH
	1	46.5271	0.628507	P Value	Summary		P Value	Summary
	0.939523	46.8507	0.558644	<0.0001	****		<0.0001	****
	1.01396	46.8507	0.486327

## Sheet: Fig. 4- figure supplement 1C
Cells with growth potentital (%)		Two-way ANOVA
WT	ΔrecA	WT vs ΔrecA
1.83333	0.017427	P Value	Summary
1.65385	0.012864	0.0041	**
1.4717	0.020225

## Sheet: Fig. 4- figure supplement 1D
Cells with growth potentital (%)		Two-way ANOVA
Vector	recG	Vector vs recG
2.6087	131.035	P Value	Summary
2.22222	113.207	0.0116	*
4.0625	164.563
