# Supplementary material for: Cyclic di-GMP as an antitoxin regulates bacterial genome stability and antibiotic persistence in biofilms
Source: eLife. 2024 Oct 4;13:RP99194. doi: 10.7554/eLife.99194 (PMC11452175; doi:10.7554/eLife.99194)
Supplement: Figure 4—source data 1. [file elife-99194-fig4-data1.xlsx]

## Sheet: Fig. 4B
Cells with growth potentital (%)							Two-way ANOVA			Two-way ANOVA
Vector	hipH::WT	deletion 1	deletion 2	deletion 3	deletion 4	deletion 5	WT vs deletion 1			WT vs deletion 2
675	3.6	925.49	630.556	1.18681	0.989247	1.38272	P Value	Summary		P Value	Summary
659.091	3.34694	830.189	611.429	1.51724	0.72381	1.05263	0.0048	**		0.0197	*
727.273	5.38462	1056	392.593	0.987654	1.01205	1.44681

## Sheet: Fig. 4C
Death cells ratio (%)
Vector	hipH::WT	deletion 1	deletion 2	deletion 3	deletion 4	deletion 5
0	30.99	0	0	31.94	31.9	32.17
0	27.99	0	0	28.67	31.9	33.42
0	32.1	0	0	26.07	32.41	27.48
VBNC ratio (%)
Vector	hipH::WT	deletion 1	deletion 2	deletion 3	deletion 4	deletion 5
0	65.41	0	0	66.8732	67.1107	66.4473
0	68.6631	0	0	69.8128	67.3762	65.5274
0	62.5154	0	0	72.9424	66.578	71.0732
Ratio of VBNC and death cells (%)
Vector	hipH::WT	deletion 1	deletion 2	deletion 3	deletion 4	deletion 5
0	96.4	0	0	98.8132	99.0108	98.6173
0	96.6531	0	0	98.4828	99.2762	98.9474
0	94.6154	0	0	99.0123	98.9879	98.5532

## Sheet: Fig. 4E
	HipH concentration (nM)
bp	400	200	100	50	25
8676.22	5.8785e-05	5.45721e-05	0.000292548	0.000266311	0.000461
8617.89	0.000106303	8.01973e-05	0.000287679	0.000503782	0.000469
8559.96	0.000167537	0.000143786	0.000338576	0.000406	0.000482
8502.42	0.000102384	0.000277132	0.000355837	0.00028073	0.000551
8445.27	0.00015676	0.000166564	0.000309366	0.000436641	0.000576
8388.5	0.000163618	0.000160869	0.00035982	0.000513696	0.000537
8332.13	0.000205258	0.000145684	0.000432404	0.000471338	0.000555
8276.14	0.000211626	0.000143311	0.000365574	0.00056146	0.000597
8220.53	0.000284617	0.000162767	0.000340347	0.000605169	0.000585
8165.3	0.00011904	0.000170835	0.000400538	0.000521356	0.000579
8110.45	9.0137e-05	0.000244863	0.000444354	0.000490264	0.000585
8055.97	0.000172926	0.00013904	0.000495693	0.000624996	0.000602
8001.88	0.000188112	0.000137617	0.0005311	0.000755673	0.000634
7948.15	-1.9595e-05	0.000136193	0.000530657	0.00075342	0.000618
7894.79	-9.6505e-05	3.84378e-05	0.000508528	0.000778654	0.000646
7841.8	-4.5558e-05	3.89123e-05	0.000539066	0.000716921	0.000779
7789.18	6.90724e-05	7.49774e-05	0.000622715	0.000767389	0.000791
7736.93	0.000250326	2.42016e-05	0.000682906	0.000862919	0.000796
7685.03	0.000170966	3.32178e-06	0.00070592	0.000798031	0.000901
7633.5	0.000161169	0.000221136	0.000740884	0.00078992	0.000914
7582.32	0.000284617	0.00034072	0.000863037	0.000842641	0.000932
7531.5	0.00031352	0.000346889	0.000955095	0.000955744	0.001067
7481.04	9.0137e-05	0.00034594	0.00102945	0.001031	0.001215
7430.93	0.000162149	0.000250083	0.00107459	0.00115356	0.001336
7381.17	0.000230731	0.000241541	0.00111177	0.00149332	0.001598
7331.76	0.0002371	0.000305604	0.00121799	0.00170376	0.001923
7282.7	0.000333115	0.000401461	0.00138971	0.00183669	0.002202
7233.98	0.000551109	0.000440848	0.00154993	0.00215347	0.002549
7185.6	0.000585401	0.000502064	0.00174776	0.00244997	0.00296
7137.57	0.000639777	0.00057799	0.00193099	0.00267798	0.003453
7089.87	0.000507511	0.000642053	0.00212838	0.00327639	0.004048
7042.51	0.000606465	0.000719878	0.00236384	0.00374277	0.004582
6995.49	0.000759306	0.000854173	0.00245412	0.00412984	0.005164
6948.8	0.000830338	0.00103213	0.00246475	0.00456558	0.005815
6902.45	0.00097828	0.00124994	0.00245811	0.00489813	0.006372
6856.42	0.00101355	0.00129834	0.00246475	0.00523744	0.006759
6810.72	0.00108899	0.00127889	0.00257318	0.00540597	0.007092
6765.35	0.00101502	0.00137427	0.00273118	0.00552313	0.007302
6720.3	0.000841115	0.00144071	0.0026493	0.00552673	0.007409
6675.58	0.000811723	0.00150002	0.0025807	0.00545599	0.007516
6631.17	0.00086169	0.00166564	0.00253335	0.00531044	0.007585
6587.09	0.00094252	0.00169601	0.00237579	0.0052424	0.007511
6543.32	0.000974851	0.00167845	0.00219344	0.00511623	0.007532
6499.87	0.000759796	0.00178142	0.00193852	0.00485172	0.007603
6456.73	0.000640757	0.00165377	0.00166278	0.00449033	0.007571
6413.9	0.000740201	0.00141413	0.00132554	0.00411002	0.007469
6371.38	0.000567765	0.00122811	0.00102015	0.00363462	0.007175
6329.17	0.000426191	0.00102928	0.000761686	0.00296907	0.006557
6287.26	0.000387491	0.000882171	0.000584652	0.00260858	0.005647
6245.66	0.000173906	0.000696625	0.000399653	0.00218366	0.004555
6204.37	2.93925e-05	0.000494946	0.000303612	0.00165915	0.003352
6163.37	-1.7636e-05	0.000400512	0.000379736	0.00111391	0.002373
6122.67	7.0542e-05	0.000369192	0.000499676	0.000757025	0.001621
6082.27	-3.7231e-05	0.00042329	0.000532428	0.000548843	0.001159
6042.17	5.43761e-05	0.000399089	0.000473564	0.00064978	0.000897
6002.35	5.0947e-05	0.000331229	0.000469138	0.000734044	0.000896
5962.83	-2.7923e-05	0.000333127	0.000520035	0.000756124	0.000878
5923.6	9.99345e-05	0.000248185	0.00050366	0.000646626	0.000882
5884.66	-0.00015921	0.000194562	0.000504987	0.000648428	0.000957
5846.01	-0.00010189	0.000214492	0.000566949	0.000501079	0.00092
5807.64	7.25015e-05	0.000176055	0.000547475	0.000543887	0.00092
5769.55	-5.8785e-06	0.000173682	0.000555885	0.000553349	0.000884
5731.75	0.000175865	0.000175105	0.000582882	0.000529467	0.000859
5694.22	0.000285597	0.000149006	0.000610322	0.00068673	0.000849
5656.98	0.000121489	0.000229678	0.00062714	0.000839036	0.000826
5620.01	0.000102874	0.000307502	0.000686004	0.00100937	0.00078
5583.31	0.000182234	0.000265743	0.000698396	0.00115311	0.000781
5546.89	0.000384062	0.000200256	0.00074177	0.00119502	0.000934
5510.74	0.000124918	0.000256252	0.000864808	0.00106885	0.00103
5474.86	0.000331156	0.000316044	0.000915262	0.00105488	0.000946
5439.24	0.000458033	0.000255777	0.000790896	0.00100711	0.000878
5403.9	0.000341933	0.000323162	0.000786913	0.00104316	0.000852
5368.81	0.000163128	0.000514876	0.000908181	0.00101342	0.000926
5333.99	0.000361528	0.000524842	0.000963504	0.000891758	0.000909
5299.43	0.000286577	0.000597446	0.000996255	0.000957547	0.001014
5265.13	0.000212606	0.000662458	0.00110911	0.0013311	0.001121
5231.09	0.000259144	0.000533383	0.00115691	0.00134462	0.00117
5197.31	0.000180764	0.000564229	0.00143131	0.00142753	0.001212
5163.78	0.000341933	0.000555687	0.00175573	0.00148251	0.001307
5130.5	0.000295395	0.000575618	0.00189558	0.00144015	0.001396
5097.48	0.000240529	0.000671949	0.00206908	0.00149107	0.00146
5064.7	0.000263553	0.000817633	0.00195976	0.00176594	0.001502
5032.17	0.000425212	0.000905423	0.00193409	0.00202099	0.001624
4999.89	0.00015578	0.000847529	0.00203544	0.00211561	0.001748
4967.86	0.00023416	0.000845631	0.00214697	0.00212823	0.001893
4936.07	0.000298824	0.000866511	0.00245766	0.00214986	0.002062
4904.52	0.00043158	0.000826649	0.00269268	0.00258966	0.002282
4873.21	0.000323318	0.000782517	0.00275597	0.00294834	0.0026
4842.14	0.00042962	0.000979451	0.00279668	0.00323853	0.002951
4811.3	0.000461462	0.00118778	0.0031149	0.00357965	0.003322
4780.7	0.000421293	0.00127129	0.00343666	0.00406766	0.004055
4750.34	0.00058932	0.00141318	0.00367875	0.00460569	0.004834
4720.21	0.000838176	0.00159113	0.00394829	0.00530684	0.005364
4690.31	0.000969463	0.00181701	0.00428288	0.00585793	0.005862
4660.64	0.00117913	0.00199117	0.00450196	0.00639371	0.006537
4631.19	0.00126241	0.0021696	0.00486797	0.00666407	0.007004
4601.98	0.00138929	0.00246381	0.0051738	0.00734765	0.007503
4572.98	0.00143044	0.00270203	0.00519548	0.00787216	0.008074
4544.21	0.00146081	0.00287951	0.00540438	0.00819209	0.008458
4515.67	0.00159111	0.00311346	0.00568233	0.00866884	0.008878
4487.34	0.00169448	0.00324776	0.00587883	0.00881529	0.009407
4459.23	0.00185124	0.00346415	0.00596514	0.00879861	0.009786
4431.34	0.00184095	0.00362264	0.00609835	0.00941911	0.010128
4403.66	0.00204327	0.003765	0.00638825	0.00919019	0.010431
4376.2	0.00221325	0.00401509	0.0063431	0.00961828	0.010564
4348.95	0.00211038	0.00419873	0.00645286	0.00944704	0.010713
4321.92	0.00216329	0.00433777	0.00627494	0.00941685	0.010759
4295.09	0.00205356	0.00430645	0.00618554	0.00894461	0.010536
4268.47	0.00220444	0.00423622	0.00583944	0.00866704	0.010008
4242.06	0.00224657	0.00432876	0.00567967	0.00807268	0.009508
4215.85	0.00203396	0.00424761	0.00556327	0.00758692	0.009113
4189.85	0.00193648	0.00396668	0.00498526	0.00710207	0.008386
4164.05	0.00193501	0.00386655	0.00481221	0.00649104	0.00747
4138.45	0.00192864	0.00374745	0.00467899	0.00584712	0.006931
4113.05	0.00173955	0.00350828	0.00450505	0.00570157	0.006608
4087.85	0.00175718	0.00332558	0.00418462	0.00563894	0.005961
4062.85	0.00164892	0.00317278	0.00387924	0.00551502	0.005373
4038.04	0.00166117	0.00314905	0.00362343	0.00486929	0.004952
4013.42	0.00153772	0.00309353	0.00352031	0.00454891	0.004617
3989	0.00148579	0.00301381	0.00367256	0.00418211	0.004422
3964.77	0.00147061	0.00273193	0.00357076	0.00426863	0.004087
3940.73	0.00135891	0.00255587	0.00337647	0.0040992	0.003958
3916.88	0.00143386	0.00249466	0.00321227	0.00408613	0.003862
3893.21	0.00151078	0.00255967	0.00317376	0.00366481	0.003491
3869.73	0.00145493	0.00256774	0.00317907	0.00342193	0.003329
3846.44	0.00140398	0.00259479	0.00304187	0.00352647	0.003196
3823.33	0.00140888	0.00266502	0.00306268	0.00359317	0.002956
3800.4	0.00144366	0.00262041	0.00303302	0.00347646	0.002989
3777.65	0.00153331	0.00242443	0.00299275	0.00338994	0.003082
3755.07	0.00147207	0.00241968	0.00290113	0.00331424	0.003052
3732.68	0.00147795	0.00240307	0.00295734	0.00322637	0.002907
3710.46	0.00129621	0.00223841	0.00296354	0.0033237	0.002941
3688.42	0.00130013	0.0022963	0.00291662	0.00297358	0.002779
3666.55	0.00152008	0.00245622	0.00279314	0.00315652	0.002676
3644.85	0.00143141	0.00245005	0.00282324	0.00296862	0.002709
3623.33	0.00149608	0.00241114	0.00287812	0.00296997	0.00271
3601.97	0.00155731	0.00223698	0.00281616	0.00305694	0.002783
3580.78	0.00139124	0.00227257	0.0028135	0.00301683	0.002824
3559.76	0.00142505	0.00233331	0.00270684	0.00297628	0.00274
3538.91	0.00156074	0.00242063	0.0028405	0.00307496	0.00272
3518.22	0.00152008	0.00231718	0.00288741	0.00315517	0.002749
3497.69	0.00137704	0.00239026	0.00282943	0.00315112	0.002821
3477.32	0.00151616	0.00253547	0.00279447	0.00311552	0.00279
3457.12	0.00160336	0.00239026	0.00295159	0.00301774	0.002696
3437.07	0.00164549	0.00243582	0.00303878	0.00308713	0.002796
3417.19	0.00163324	0.00238219	0.00296044	0.0030245	0.002795
3397.46	0.00149559	0.00243819	0.00289582	0.00294023	0.002732
3377.88	0.00160532	0.00238362	0.00283696	0.00291635	0.002859
3358.46	0.00172142	0.00238409	0.00299319	0.0032471	0.002952
3339.19	0.00177972	0.0026375	0.00297637	0.00303621	0.003046
3320.08	0.00165774	0.00264272	0.00278119	0.00325926	0.003262
3301.11	0.00148677	0.00263038	0.00298434	0.00330117	0.003514
3282.3	0.00155437	0.00251506	0.00310207	0.0032516	0.003809
3263.63	0.00178217	0.00249181	0.00310782	0.00330793	0.004224
3245.11	0.00181548	0.00243677	0.00312508	0.00372835	0.004681
3226.74	0.0017611	0.00239595	0.00310251	0.00397709	0.005234
3208.51	0.00184781	0.00249418	0.00317907	0.00433847	0.005799
3190.42	0.00186691	0.00240544	0.00338665	0.00443716	0.006269
3172.48	0.00178755	0.00229345	0.0032459	0.00464219	0.006832
3154.67	0.00179588	0.00249893	0.00326892	0.00481387	0.007501
3137.01	0.0018772	0.00266265	0.00353934	0.00522347	0.007951
3119.49	0.00190806	0.00266217	0.00369867	0.00504007	0.00827
3102.1	0.00181646	0.00268305	0.00363228	0.0053555	0.008559
3084.85	0.00199477	0.00268068	0.00353093	0.00536091	0.008591
3067.74	0.00201388	0.00284534	0.00361148	0.00539921	0.008683
3050.76	0.00197028	0.0027642	0.00365131	0.00533387	0.00898
3033.91	0.00207119	0.00269302	0.00367521	0.0054285	0.009291
3017.19	0.00209519	0.00262753	0.00353934	0.00536001	0.00922
3000.61	0.00218582	0.00271769	0.00353845	0.00516579	0.009175
2984.15	0.00217847	0.00270535	0.00359732	0.0052798	0.009318
2967.83	0.00209373	0.00270203	0.00360351	0.00530098	0.009142
2951.63	0.00206237	0.00273335	0.00364379	0.00528431	0.009078
2935.55	0.0020467	0.00276467	0.00354863	0.00535866	0.008966
2919.61	0.00203837	0.00281497	0.00354775	0.00504323	0.008633
2903.78	0.00188847	0.00274332	0.00344772	0.00497023	0.008183
2888.08	0.00199085	0.00268637	0.00321404	0.00454125	0.007461
2872.5	0.00217602	0.00272054	0.00319235	0.00433577	0.00654
2857.04	0.00211479	0.00268827	0.00303346	0.00373736	0.005641
2841.71	0.00194137	0.00251411	0.0027511	0.00332325	0.004639
2826.49	0.0018145	0.00254022	0.00270994	0.00285597	0.00369
2811.38	0.00199673	0.00255018	0.00267409	0.00287895	0.003018
2796.4	0.00218288	0.0025535	0.00266302	0.00252116	0.002537
2781.53	0.00197616	0.00265458	0.00270507	0.00235489	0.002072
2766.77	0.00170232	0.00251981	0.00262408	0.00225485	0.001875
2752.13	0.00166705	0.00254022	0.00251874	0.00222376	0.001739
2737.6	0.00179833	0.00241921	0.00250591	0.00239905	0.001645
2723.18	0.00200065	0.00237745	0.00257097	0.00229451	0.001753
2708.88	0.00204425	0.00240687	0.00243465	0.00237517	0.001669
2694.68	0.00196881	0.00249229	0.0025599	0.00238012	0.001584
2680.59	0.00189778	0.00263085	0.00243996	0.00220754	0.001527
2666.61	0.00193207	0.00277654	0.00222177	0.00228775	0.0016
2652.73	0.00200261	0.00274474	0.00227045	0.00211922	0.001465
2638.96	0.00204474	0.00251269	0.00231737	0.00213905	0.001477
2625.29	0.00194333	0.00240829	0.00262231	0.00204532	0.001477
2611.73	0.00201828	0.00236321	0.00260814	0.00221835	0.00146
2598.27	0.00208001	0.00233047	0.00244439	0.00237156	0.001476
2584.91	0.0020805	0.00245527	0.00254707	0.00227423	0.001521
2571.65	0.00202759	0.00235277	0.00249396	0.00229991	0.00157
2558.49	0.00194431	0.00223366	0.00234879	0.00227513	0.001445
2545.43	0.00202367	0.00232477	0.00238951	0.00197457	0.001329
2532.46	0.00182478	0.00225834	0.00233773	0.00201513	0.001301
2519.6	0.0019546	0.00220329	0.00255636	0.00226206	0.001348
2506.82	0.00203886	0.00243724	0.00246342	0.00222466	0.001268
2494.15	0.00187916	0.00246951	0.00243642	0.00242068	0.001294
2481.56	0.00183997	0.0023727	0.00250856	0.00223998	0.001274
2469.08	0.00201045	0.00218431	0.00244572	0.00220664	0.001274
2456.68	0.0019644	0.0022702	0.00237844	0.00218321	0.001404
2444.37	0.00200065	0.00230769	0.00242801	0.00197863	0.001364
2432.15	0.0019644	0.00235704	0.00252804	0.00214986	0.001368
2420.03	0.00189386	0.00234755	0.00224921	0.00190203	0.001316
2407.99	0.00184193	0.00242965	0.00222265	0.00185967	0.001236
2396.04	0.00198987	0.00234565	0.00222841	0.00207866	0.001278
2384.17	0.00197469	0.00235087	0.00224832	0.00223097	0.001249
2372.39	0.00204915	0.00236748	0.00226381	0.00213003	0.001154
2360.7	0.00203396	0.00231955	0.00236915	0.00204712	0.00114
2349.09	0.00200751	0.00227495	0.00228019	0.00190203	0.001131
2337.56	0.00211626	0.00237555	0.00237977	0.00184164	0.001112
2326.12	0.00227498	0.00254449	0.00224921	0.00185606	0.001172
2314.75	0.00219415	0.00258102	0.00223018	0.00208768	0.001209
2303.47	0.00209471	0.00243249	0.00230719	0.00210075	0.001342
2292.27	0.00198301	0.00239168	0.00226957	0.00199846	0.001317
2281.14	0.00202661	0.00238884	0.00220539	0.00197232	0.001194
2270.1	0.00199673	0.00226735	0.00222973	0.00189437	0.00129
2259.13	0.00207364	0.00231386	0.00234923	0.00186102	0.001191
2248.23	0.00210989	0.0024994	0.00253512	0.00191599	0.001103
2237.42	0.00217162	0.00244436	0.00240146	0.00208182	0.001192
2226.68	0.00218386	0.00255682	0.0023094	0.00191149	0.001195
2216.01	0.00218239	0.00249466	0.00239216	0.00199485	0.001053
2205.41	0.00218582	0.00226308	0.00224168	0.00209849	0.001106
2194.89	0.00221179	0.00221088	0.00226381	0.00210075	0.00112
2184.44	0.00211773	0.0021957	0.00228506	0.00224224	0.001152
2174.06	0.00201731	0.00238219	0.00213635	0.00211336	0.001136
2163.75	0.00212802	0.00227732	0.00226603	0.00201378	0.00124
2153.51	0.00222354	0.00235799	0.0023479	0.00196466	0.001208
2143.34	0.00206237	0.002451	0.00227355	0.00200476	0.001089
2133.24	0.00214859	0.00239928	0.00237357	0.00186237	0.001035
2123.2	0.00213438	0.00230437	0.00226293	0.00176143	0.001069
2113.23	0.00219072	0.00235609	0.00207572	0.00189797	0.001196
2103.32	0.00220885	0.00230294	0.0022169	0.00178216	0.001134
2093.49	0.00217358	0.00237365	0.00235145	0.00188715	0.001053
2083.71	0.00215398	0.00220471	0.00235631	0.00191509	0.001096
2074	0.00226959	0.00228966	0.00232445	0.00188625	0.001021
2064.35	0.0022593	0.00230484	0.00223283	0.00176639	0.000965
2054.76	0.00204866	0.00230817	0.0022855	0.00178577	0.000842
2045.23	0.00225538	0.00232715	0.00219521	0.00176143	0.000867
2035.77	0.0022593	0.00241778	0.0022886	0.00193762	0.000876
2026.36	0.00213781	0.00232335	0.0023302	0.00190518	0.00095
2017.02	0.00229506	0.00220329	0.0024435	0.00186147	0.00094
2007.73	0.00211773	0.00228871	0.00221336	0.00170286	0.000975
1998.5	0.00216035	0.00237365	0.00226027	0.00177225	0.001046
1989.33	0.00220346	0.00226925	0.00232268	0.00193402	0.001001
1980.21	0.00226273	0.0023485	0.00212263	0.00184795	0.000928
1971.15	0.00225098	0.00232572	0.00213679	0.00175287	0.001072
1962.14	0.00229702	0.00227922	0.00224213	0.00194754	0.000985
1953.19	0.00218925	0.00218858	0.00204164	0.00157623	0.000885
1944.3	0.00220591	0.00225454	0.00197525	0.00186192	0.000905
1935.45	0.00216035	0.00244436	0.00212174	0.0018448	0.000961
1926.66	0.00215104	0.00244009	0.00210493	0.00174747	0.001079
1917.93	0.00220689	0.00248185	0.0020943	0.00156182	0.000979
1909.24	0.002153	0.00246097	0.00215361	0.00176684	0.000972
1900.6	0.00226126	0.00232335	0.00223372	0.00196556	0.001034
1892.02	0.00239255	0.00224885	0.00237357	0.00165554	0.000939
1883.48	0.00248955	0.00230722	0.00239659	0.00169339	0.000944
1874.99	0.00240725	0.00235989	0.00222487	0.00168618	0.000916
1866.55	0.00218974	0.00231955	0.00219654	0.00171367	0.00099
1858.16	0.00237002	0.00223603	0.00207395	0.00157173	0.001035
1849.82	0.00243272	0.00232904	0.00199738	0.00175062	0.000974
1841.52	0.00257086	0.0022664	0.00216777	0.00140545	0.000908
1833.27	0.00243419	0.00220709	0.00225363	0.0016267	0.000844
1825.06	0.00233817	0.0023485	0.00218548	0.0015911	0.000904
1816.9	0.00230829	0.00231623	0.00234259	0.00156542	0.001016
1808.78	0.00230927	0.00235894	0.0021899	0.00168618	0.001108
1800.71	0.00236757	0.002274	0.00201154	0.00181416	0.001155
1792.68	0.00229311	0.00234945	0.00209076	0.00157939	0.001003
1784.7	0.00244399	0.00236748	0.00224213	0.00145097	0.000927
1776.75	0.00230143	0.00224885	0.00227975	0.0015857	0.001
1768.85	0.0023465	0.0022982	0.00215671	0.00142258	0.000986
1760.99	0.00229604	0.00235562	0.0022169	0.00146538	0.000975
1753.17	0.00229604	0.00236558	0.00206023	0.00158209	0.000957
1745.39	0.00225195	0.0023243	0.00195976	0.00145232	0.000903
1737.65	0.00237051	0.00240118	0.00196773	0.00151	0.000885
1729.95	0.00239402	0.0024994	0.00209209	0.00153117	0.000909
1722.28	0.00246799	0.00257391	0.00205049	0.00141446	0.000851
1714.66	0.00222893	0.00255635	0.00209696	0.00144195	0.00077
1707.07	0.00204229	0.00246049	0.00213325	0.00143069	0.000748
1699.52	0.00214565	0.00254733	0.00212706	0.00149377	0.000792
1692.01	0.00219268	0.00243724	0.00216025	0.0015154	0.000816
1684.53	0.00240333	0.00226451	0.00199074	0.00142168	0.000791
1677.09	0.00227841	0.00226024	0.00213768	0.00157578	0.000956
1669.69	0.0022789	0.00231813	0.00207173	0.0015857	0.000903
1662.32	0.00230094	0.00234043	0.00203455	0.00132389	0.000721
1654.98	0.00239745	0.00244863	0.00196507	0.00152351	0.00083
1647.68	0.00242831	0.00242158	0.00183008	0.00161183	0.000991
1640.41	0.00229849	0.00238836	0.00203234	0.00115536	0.000768
1633.18	0.00240333	0.00228539	0.00210316	0.00141131	0.000841
1625.98	0.0024915	0.00236274	0.00196551	0.00163346	0.000764
1618.81	0.00223873	0.00225312	0.00208147	0.00133606	0.000652
1611.67	0.00236708	0.00241968	0.00196728	0.00147124	0.000694
1604.56	0.00250914	0.00228823	0.00201154	0.00132389	0.000811
1597.49	0.00244007	0.00223936	0.00193542	0.00140095	0.000756
1590.44	0.00240774	0.00222559	0.00193365	0.00139329	0.000735
1583.43	0.00242831	0.00241636	0.00199251	0.0012937	0.000705
1576.45	0.00250179	0.00240212	0.00203632	0.0013676	0.000747
1569.49	0.00244889	0.00220282	0.002008	0.0015127	0.000851
1562.57	0.00256401	0.00222085	0.00204739	0.00119412	0.000698
1555.67	0.00256939	0.00231291	0.00205757	0.00112247	0.000578
1548.81	0.00240186	0.00230817	0.00195224	0.000874184	0.000502
1541.97	0.00228674	0.00230484	0.00200844	0.00125225	0.000566
1535.16	0.0023803	0.00226925	0.00180353	0.00156136	0.000727
1528.37	0.00252433	0.00237935	0.00176856	0.00137301	0.000681
1521.62	0.00242586	0.00239643	0.0019571	0.00130857	0.000693
1514.89	0.00255078	0.0020111	0.00200003	0.00117925	0.000603
1508.19	0.002661	0.00201015	0.00197259	0.00109859	0.000487
1501.51	0.00254882	0.00212215	0.00198499	0.00108777	0.000637
1494.86	0.00239402	0.00222132	0.0019664	0.00149512	0.000752
1488.24	0.00237002	0.00220804	0.0017336	0.00146764	0.00075
1481.64	0.00236218	0.00225217	0.00189912	0.00150774	0.000776
1475.06	0.00228968	0.00217956	0.00208988	0.00114049	0.00084
1468.51	0.00232936	0.0021995	0.00213015	0.00105398	0.000733
1461.99	0.00241361	0.0021397	0.00217087	0.00110445	0.000564
1455.49	0.00227988	0.00214445	0.00193984	0.00107516	0.000637
1449.01	0.00239598	0.00220282	0.00188629	0.00138788	0.000717
1442.56	0.00220003	0.00220709	0.00195577	0.00102198	0.000672
1436.13	0.00223922	0.00224837	0.00175396	0.00133831	0.000648
1429.72	0.00243566	0.00213259	0.0017482	0.00103055	0.000611
1423.33	0.00229115	0.00221231	0.00168801	0.00115717	0.00057
1416.97	0.00244448	0.00203198	0.00179335	0.00127207	0.000646
1410.63	0.00235679	0.00196317	0.00176237	0.00103866	0.000691
1404.32	0.00229898	0.00195416	0.00162207	0.000995849	0.000587
1398.02	0.00237834	0.00199259	0.00169465	0.00117519	0.000608
1391.75	0.00250473	0.00206805	0.00165128	0.00118646	0.000682
1385.5	0.0025013	0.00215631	0.00146893	0.000969713	0.000635
1379.26	0.00239353	0.00220566	0.00159109	0.00111886	0.000637
1373.06	0.00223481	0.00218383	0.0017274	0.00105533	0.000582
1366.87	0.00232348	0.00217956	0.0016827	0.00110264	0.000528
1360.7	0.00260956	0.00205429	0.00167031	0.00120764	0.000604
1354.55	0.00247779	0.00202534	0.00172165	0.00114365	0.000528
1348.42	0.0023999	0.00195368	0.00167341	0.000862468	0.000385
1342.32	0.00233474	0.00195938	0.00163844	0.000774148	0.000409
1336.23	0.0023274	0.0021435	0.00153134	0.000724131	0.000522
1330.16	0.00233132	0.00208845	0.00156276	0.00100937	0.000686
1324.11	0.00225538	0.00196317	0.00163711	0.00099675	0.000636
1318.08	0.00212361	0.00205096	0.00160127	0.000886801	0.000709
1312.07	0.00235679	0.00215299	0.00143353	0.00096746	0.000623
1306.08	0.00238765	0.00213686	0.0015756	0.00113238	0.00058
1300.11	0.00223922	0.00204527	0.001796	0.000957997	0.000675
1294.16	0.00239206	0.00196365	0.00182079	0.000970164	0.000552
1288.23	0.00207609	0.00218146	0.00171545	0.000680872	0.000468
1282.31	0.00207266	0.00202961	0.00157914	0.000754321	0.000474
1276.42	0.00215888	0.00197029	0.00141981	0.000922399	0.000447
1270.54	0.00207756	0.00184786	0.00151275	0.000688983	0.000431
1264.68	0.00217554	0.00181701	0.00144946	0.000912486	0.000531
1258.84	0.00212018	0.00185545	0.00142246	0.000980077	0.000548
1253.01	0.00209911	0.00190623	0.00147203	0.000885449	0.000392
1247.21	0.00199428	0.00186162	0.00151585	0.000903924	0.000367
1241.42	0.00202857	0.00201205	0.00146539	0.0010364	0.00042
1235.65	0.00220248	0.00198832	0.0015185	0.000776852	0.000515
1229.9	0.00225391	0.00199165	0.00155524	0.000833629	0.000561
1224.17	0.00232887	0.00195748	0.00129898	0.000598861	0.000477
1218.45	0.00234405	0.00197883	0.00135076	0.000571374	0.000432
1212.75	0.00227449	0.00198453	0.00145477	0.000625898	0.000258
1207.07	0.00204033	0.00184406	0.00165128	0.000560559	0.000257
1201.41	0.00221179	0.00177953	0.00148531	0.000732242	0.000331
1195.76	0.00213977	0.00185593	0.0013844	0.000750717	0.000446
1190.13	0.00206825	0.00176861	0.00134368	0.00063536	0.000308
1184.52	0.00223971	0.00185878	0.00138883	0.000787216	0.000342
1178.93	0.00238177	0.00177051	0.00136094	0.000595707	0.000349
1173.35	0.00218092	0.00182935	0.00141981	0.000801636	0.000475
1167.79	0.00200849	0.00180657	0.00146805	0.000917442	0.00057
1162.25	0.00193746	0.00174963	0.00147159	0.00102784	0.000578
1156.72	0.00198448	0.00174726	0.00146451	0.000867875	0.000557
1151.22	0.00185712	0.00168272	0.00131182	0.000922399	0.000589
1145.73	0.00208491	0.00182271	0.00130252	0.00080524	0.000543
1140.25	0.00199918	0.00186779	0.00152957	0.000832728	0.00052
1134.8	0.00209324	0.00182461	0.00135475	0.000606071	0.000536
1129.36	0.00207364	0.00169079	0.00123082	0.000780907	0.000532
1123.94	0.00191296	0.00175675	0.0013158	0.000707909	0.000536
1118.54	0.00196195	0.00180942	0.00122994	0.000757926	0.000551
1113.15	0.0019693	0.00167608	0.00114408	0.000771895	0.000475
1107.78	0.0019159	0.00161676	0.00124986	0.000757926	0.000572
1102.43	0.00185908	0.00162673	0.00141981	0.000784062	0.000508
1097.1	0.00191002	0.00163716	0.00128349	0.000703403	0.000422
1091.79	0.00187181	0.00165709	0.0013096	0.000676366	0.00046
1086.49	0.00179833	0.00165757	0.00122419	0.000675014	0.00045
1081.21	0.00192423	0.00161154	0.00128792	0.000765136	0.000441
1075.95	0.00187965	0.00156503	0.00124853	0.000869678	0.000456
1070.71	0.00192815	0.00159113	0.00123348	0.000641669	0.000423
1065.49	0.00197958	0.00152138	0.00121135	0.000702501	0.000393
1060.28	0.00178657	0.00153277	0.00112151	0.00071602	0.000351
1055.09	0.00167733	0.00150667	0.00119498	0.000585343	0.000423
1049.92	0.00168762	0.00146728	0.00125561	0.000735396	0.000442
1044.77	0.00172975	0.00150904	0.00121046	0.000466382	0.000417
1039.64	0.00166705	0.00148721	0.00117373	0.000729538	0.000447
1034.53	0.00160336	0.00135102	0.00107415	0.000570923	0.000362
1029.43	0.00162394	0.00135861	0.00114806	0.000555602	0.000415
1024.36	0.00166655	0.00149812	0.00115647	0.000528566	0.000436
1019.31	0.00170623	0.00144118	0.00109805	0.000497924	0.000361
1014.27	0.00160973	0.0013382	0.000994927	0.000570923	0.000375
1009.25	0.00163275	0.00134912	0.00107415	0.000496122	0.00037
1004.26	0.00166166	0.00137095	0.00100688	0.000365445	0.000384
999.28	0.00157691	0.00131732	0.00104317	0.000530819	0.000416
994.33	0.00157299	0.00139325	0.000948898	0.000489363	0.000377
989.39	0.00168517	0.00129882	0.000886494	0.000500628	0.000409
984.47	0.00159748	0.00126797	0.000905083	0.000514597	0.000396
979.58	0.00153625	0.00122384	0.000964831	0.000494319	0.000325
974.71	0.00154996	0.00115124	0.000961291	0.000641669	0.000408
969.85	0.0014515	0.00113463	0.000978552	0.0005538	0.000427
965.02	0.00150343	0.00123143	0.000976339	0.00058354	0.000436
960.21	0.00152841	0.00120296	0.000961733	0.000502881	0.000404
955.42	0.00132364	0.00114934	0.000946243	0.000515498	0.000353
950.66	0.00134422	0.00105301	0.000931195	0.000507838	0.000361
945.92	0.00140986	0.00110283	0.000976781	0.000414111	0.000357
941.19	0.00146228	0.00116357	0.000952439	0.000244231	0.00036
936.5	0.00145689	0.00111327	0.000918803	0.000430783	0.000428
931.82	0.00143239	0.00105016	0.000897559	0.000366346	0.000454
927.17	0.00142162	0.00111232	0.000857284	0.000339309	0.000348
922.54	0.00134618	0.00109476	0.000927654	0.000458271	0.000363
917.93	0.00137949	0.00107721	0.000835597	0.000379414	0.000466
913.35	0.00148922	0.00102596	0.000834712	0.000329847	0.000355
908.79	0.00141329	0.00099179	0.000780717	0.000496122	0.000371
904.26	0.00136675	0.00098562	0.000878528	0.000342464	0.000416
899.75	0.0013741	0.00110758	0.000859939	0.000357784	0.000372
895.27	0.00141623	0.00111185	0.000850645	0.000395636	0.00036
890.81	0.00137067	0.000982773	0.000829401	0.000395636	0.000349
886.38	0.00134814	0.000927727	0.000778504	0.000356883	0.000332
881.97	0.00139174	0.000985146	0.000778061	0.000230712	0.00026
877.59	0.00134667	0.00106202	0.000804616	0.00036905	0.000279
873.24	0.00128249	0.000985146	0.000871004	0.000297853	0.000322
868.91	0.00135891	0.00106724	0.000737344	0.000325791	0.000292
864.62	0.00132413	0.000995111	0.000658121	0.000213589	0.000268
860.34	0.0012482	0.000896881	0.000709904	0.000333001	0.000316
856.1	0.00124722	0.000936268	0.000691315	0.000451061	0.000414
851.89	0.00127612	0.000866985	0.000612535	0.000345618	0.000422
847.7	0.00136283	0.000895932	0.000655466	0.000245583	0.00033
843.54	0.00126976	0.000959521	0.000619617	0.000228009	0.000263
839.42	0.0012144	0.00097613	0.00063732	0.000265409	0.00026
835.32	0.00117717	0.000904	0.00080019	0.000349223	0.000327
831.25	0.00115121	0.000827124	0.000679808	0.000284335	0.000295
827.21	0.00117619	0.00076923	0.00064927	0.000139239	0.000257
823.21	0.00118599	0.000668153	0.000639533	0.000189707	0.000195
819.23	0.00108703	0.000777772	0.000681578	0.000316328	0.000192
815.29	0.00101453	0.000778246	0.000726279	0.000178892	0.000274
811.38	0.00104931	0.000762586	0.000564736	9.86836e-05	0.000227
807.5	0.00108948	0.000769705	0.000576686	0.000141942	0.000174
803.65	0.00112965	0.000843733	0.000580669	9.95849e-05	0.00018

## Sheet: Fig. 4F
	reaction time (min)
bp	15	30	45	60
8694.66	6.38e-05	0.000223	0.000274	0.000123
8643.93	9.19e-05	0.000197	0.000253	0.00013
8593.48	0.000151	0.000222	0.000224	0.000124
8543.32	0.000197	0.000285	0.000177	0.000138
8493.44	0.000175	0.000223	0.00015	0.000161
8443.85	0.000143	0.000213	0.000119	0.000173
8394.54	0.000116	0.000237	0.00013	0.000157
8345.52	9.18e-05	0.000262	0.000156	0.000136
8296.77	0.00012	0.000233	0.000148	0.000143
8248.31	0.000144	0.000208	0.000135	0.000167
8200.12	0.000131	0.00023	0.000138	0.000189
8152.2	0.000122	0.00022	0.000152	0.00019
8104.57	0.000141	0.000236	0.000178	0.000166
8057.21	0.000181	0.000291	0.000201	0.000155
8010.12	0.000222	0.000276	0.000236	0.000166
7963.31	0.000231	0.000227	0.000256	0.000179
7916.76	0.000183	0.000269	0.000262	0.000207
7870.49	0.000167	0.000296	0.00025	0.000235
7824.48	0.000212	0.000312	0.000251	0.000237
7778.74	0.000267	0.000315	0.000246	0.00023
7733.27	0.000277	0.000276	0.000218	0.000228
7688.06	0.000253	0.00029	0.000214	0.00024
7643.11	0.000242	0.000368	0.000252	0.000248
7598.43	0.000243	0.000427	0.000284	0.000265
7554.01	0.000275	0.000422	0.00036	0.00031
7509.85	0.000363	0.000458	0.000404	0.000364
7465.95	0.000496	0.000506	0.000431	0.000427
7422.31	0.000614	0.000563	0.000445	0.000513
7378.92	0.000715	0.000678	0.000442	0.000601
7335.79	0.000828	0.000681	0.00049	0.000673
7292.91	0.001002	0.000824	0.000566	0.000754
7250.29	0.001236	0.000947	0.000642	0.00085
7207.92	0.001517	0.001187	0.000761	0.000966
7165.8	0.001832	0.001461	0.000918	0.001098
7123.93	0.002149	0.001706	0.00109	0.001212
7082.31	0.002484	0.001952	0.001269	0.001302
7040.93	0.002907	0.00223	0.001452	0.001378
6999.8	0.003396	0.002631	0.001683	0.001442
6958.92	0.003842	0.002938	0.00189	0.001511
6918.28	0.004244	0.00331	0.00204	0.001592
6877.88	0.004653	0.003615	0.002159	0.001674
6837.73	0.005022	0.003821	0.002336	0.001741
6797.81	0.005353	0.004121	0.002515	0.001795
6758.14	0.005706	0.004316	0.002611	0.001817
6718.7	0.00606	0.004569	0.002656	0.001837
6679.51	0.006378	0.004581	0.002721	0.001898
6640.54	0.006622	0.00468	0.002821	0.001974
6601.81	0.006815	0.004758	0.002916	0.002004
6563.32	0.006964	0.004785	0.003082	0.001975
6525.06	0.007095	0.00477	0.00319	0.001918
6487.03	0.00729	0.004735	0.003227	0.001849
6449.23	0.007494	0.004637	0.003275	0.00172
6411.66	0.007559	0.004558	0.003184	0.00153
6374.32	0.007446	0.004447	0.002995	0.001319
6337.21	0.007088	0.004304	0.002742	0.001123
6300.32	0.006515	0.00409	0.002462	0.000934
6263.66	0.005788	0.003781	0.002193	0.000733
6227.22	0.004949	0.003343	0.001871	0.000551
6191.01	0.004104	0.002796	0.001555	0.000416
6155.01	0.003293	0.002298	0.001231	0.000357
6119.24	0.002571	0.001854	0.000954	0.000342
6083.69	0.00194	0.001367	0.000718	0.000315
6048.35	0.001395	0.000989	0.000535	0.000275
6013.24	0.000991	0.000786	0.000441	0.00026
5978.34	0.000743	0.000586	0.00039	0.000263
5943.65	0.000606	0.000499	0.000414	0.000275
5909.18	0.000508	0.00055	0.000434	0.00031
5874.93	0.000435	0.000428	0.000379	0.000337
5840.88	0.000411	0.000482	0.00033	0.000329
5807.05	0.000435	0.000505	0.000346	0.000314
5773.42	0.000448	0.000466	0.000334	0.000314
5740.01	0.000442	0.000474	0.000355	0.000328
5706.8	0.000457	0.000472	0.00041	0.00033
5673.8	0.000483	0.000527	0.000386	0.000309
5641.01	0.00051	0.0005	0.000363	0.00028
5608.42	0.00053	0.00055	0.000315	0.000272
5576.03	0.000539	0.000524	0.000305	0.000284
5543.85	0.000553	0.000563	0.000325	0.0003
5511.87	0.000553	0.000548	0.000394	0.000314
5480.09	0.000532	0.000539	0.000451	0.00031
5448.51	0.000519	0.000541	0.000475	0.000287
5417.13	0.00054	0.000581	0.000466	0.000278
5385.95	0.000558	0.000642	0.000502	0.0003
5354.96	0.000586	0.000722	0.000563	0.000339
5324.17	0.000621	0.000769	0.000638	0.000379
5293.58	0.000703	0.000834	0.000724	0.000407
5263.17	0.000853	0.00087	0.000729	0.000452
5232.97	0.001018	0.000958	0.000716	0.000504
5202.95	0.001151	0.001024	0.00074	0.000529
5173.12	0.001292	0.001191	0.000815	0.000561
5143.48	0.001503	0.001435	0.000828	0.000656
5114.03	0.001823	0.001504	0.000832	0.000762
5084.77	0.002182	0.001739	0.000861	0.000822
5055.7	0.002549	0.002039	0.000946	0.000883
5026.81	0.002957	0.002322	0.001085	0.000972
4998.1	0.003386	0.002662	0.001272	0.001087
4969.58	0.00381	0.003	0.00151	0.00126
4941.24	0.004238	0.003399	0.001722	0.001459
4913.09	0.004652	0.003741	0.001921	0.001613
4885.11	0.005086	0.004153	0.002174	0.001713
4857.32	0.005495	0.004542	0.002413	0.001818
4829.7	0.005824	0.004887	0.002646	0.001994
4802.26	0.006133	0.005223	0.002851	0.002223
4775	0.006427	0.005486	0.003025	0.00243
4747.92	0.006681	0.005726	0.003177	0.002586
4721.01	0.006962	0.005959	0.003335	0.002725
4694.27	0.007274	0.006189	0.003567	0.00284
4667.7	0.007572	0.006268	0.003747	0.002962
4641.31	0.007843	0.006335	0.003918	0.003073
4615.09	0.008075	0.006418	0.004084	0.003189
4589.04	0.0083	0.006504	0.00425	0.00331
4563.16	0.008525	0.006578	0.004451	0.00345
4537.45	0.008666	0.006721	0.004601	0.003645
4511.91	0.008696	0.006676	0.004835	0.003831
4486.53	0.008657	0.00678	0.005008	0.003968
4461.32	0.008571	0.006838	0.005172	0.004042
4436.27	0.008453	0.006818	0.005237	0.004093
4411.39	0.008321	0.006768	0.005252	0.004121
4386.67	0.008074	0.006704	0.005262	0.004098
4362.11	0.007737	0.006632	0.005272	0.003993
4337.71	0.007409	0.006295	0.005267	0.003857
4313.47	0.007033	0.00619	0.005168	0.003756
4289.39	0.0066	0.005966	0.005033	0.003612
4265.47	0.006171	0.005585	0.004904	0.003447
4241.71	0.005729	0.005365	0.004657	0.003308
4218.1	0.005306	0.005003	0.004429	0.003161
4194.65	0.004904	0.004741	0.004185	0.00303
4171.36	0.004555	0.004486	0.00401	0.002933
4148.22	0.004301	0.004294	0.003859	0.002861
4125.23	0.004079	0.004074	0.003681	0.00281
4102.39	0.003843	0.003904	0.0035	0.002764
4079.7	0.003625	0.003676	0.003379	0.002739
4057.17	0.003455	0.003547	0.003269	0.002669
4034.78	0.003317	0.003507	0.003202	0.002555
4012.54	0.003195	0.003384	0.003079	0.002481
3990.45	0.003063	0.0033	0.002989	0.002474
3968.51	0.002915	0.003238	0.002871	0.002507
3946.71	0.002789	0.003087	0.002809	0.002499
3925.06	0.002693	0.003084	0.002796	0.002419
3903.55	0.00261	0.003064	0.002801	0.00235
3882.19	0.002543	0.002933	0.002787	0.002331
3860.96	0.002504	0.002896	0.002756	0.002315
3839.88	0.002476	0.002942	0.002757	0.002321
3818.94	0.002413	0.002856	0.002704	0.002363
3798.14	0.002338	0.002792	0.002677	0.002391
3777.48	0.002286	0.002765	0.002635	0.002382
3756.96	0.00224	0.002705	0.002669	0.002325
3736.57	0.002215	0.002727	0.00268	0.002262
3716.32	0.002208	0.002807	0.002668	0.002256
3696.21	0.002203	0.00274	0.002634	0.002267
3676.23	0.002169	0.00279	0.002599	0.002278
3656.39	0.002098	0.002729	0.002642	0.002306
3636.68	0.002077	0.002674	0.002579	0.002305
3617.1	0.002054	0.002738	0.002537	0.002294
3597.65	0.002014	0.002611	0.002513	0.002322
3578.34	0.002036	0.002556	0.002565	0.002339
3559.15	0.00208	0.002646	0.002598	0.002338
3540.09	0.002076	0.002784	0.002603	0.002356
3521.16	0.002076	0.002674	0.002605	0.002355
3502.36	0.002109	0.002703	0.002606	0.002335
3483.69	0.002142	0.002672	0.002578	0.002353
3465.14	0.002166	0.002612	0.002588	0.002362
3446.72	0.002178	0.002689	0.002553	0.002343
3428.42	0.002218	0.0027	0.002538	0.002321
3410.24	0.002296	0.002696	0.002528	0.002306
3392.19	0.002415	0.002647	0.002601	0.002302
3374.26	0.002542	0.00267	0.002649	0.002314
3356.45	0.002651	0.002679	0.0026	0.00233
3338.76	0.002802	0.002747	0.002558	0.002365
3321.19	0.003036	0.002828	0.00261	0.002403
3303.74	0.003332	0.002907	0.002639	0.00242
3286.41	0.003629	0.00286	0.002648	0.002452
3269.19	0.003933	0.002992	0.002624	0.002464
3252.09	0.004281	0.003078	0.002678	0.002443
3235.11	0.004649	0.003175	0.002744	0.00245
3218.24	0.005062	0.0033	0.002697	0.002473
3201.49	0.005478	0.003461	0.002733	0.002502
3184.85	0.005938	0.003616	0.00282	0.002537
3168.32	0.006349	0.003816	0.002859	0.002532
3151.91	0.006642	0.00398	0.002878	0.002529
3135.6	0.006866	0.004112	0.002868	0.002592
3119.41	0.007056	0.004206	0.002901	0.002676
3103.32	0.007277	0.004186	0.00304	0.002741
3087.35	0.007482	0.004137	0.003074	0.002758
3071.48	0.007609	0.004275	0.003053	0.00271
3055.72	0.007712	0.0043	0.003104	0.002681
3040.07	0.007913	0.004527	0.003138	0.002621
3024.52	0.008292	0.004559	0.003114	0.002593
3009.08	0.008703	0.004736	0.003164	0.002633
2993.74	0.009072	0.004687	0.003214	0.002632
2978.51	0.009461	0.004755	0.003252	0.002628
2963.38	0.009863	0.004877	0.003374	0.00265
2948.36	0.010142	0.004938	0.003412	0.002695
2933.43	0.010169	0.004997	0.003421	0.002774
2918.61	0.010015	0.004798	0.003458	0.002825
2903.88	0.009671	0.005142	0.003475	0.002807
2889.26	0.009188	0.00499	0.003489	0.002809
2874.73	0.008615	0.00471	0.003519	0.002895
2860.3	0.007823	0.004795	0.00345	0.002962
2845.98	0.006843	0.004485	0.003319	0.002981
2831.74	0.005843	0.004141	0.003268	0.00295
2817.61	0.004834	0.003809	0.003145	0.002849
2803.57	0.003853	0.003335	0.003084	0.002746
2789.62	0.002996	0.003112	0.003017	0.0027
2775.77	0.002345	0.002784	0.002853	0.002671
2762.01	0.001936	0.002567	0.002747	0.002607
2748.34	0.001694	0.002448	0.002652	0.002571
2734.77	0.001511	0.002278	0.002507	0.002571
2721.28	0.001427	0.002137	0.002404	0.002546
2707.89	0.001454	0.00213	0.002373	0.002525
2694.59	0.00149	0.002147	0.002421	0.002518
2681.38	0.00148	0.00214	0.002399	0.002538
2668.26	0.001419	0.002083	0.002416	0.002592
2655.22	0.001364	0.002064	0.002401	0.002614
2642.27	0.001375	0.002053	0.00236	0.002582
2629.41	0.001391	0.002028	0.002388	0.002553
2616.63	0.001395	0.002079	0.002391	0.002534
2603.94	0.001392	0.002025	0.002333	0.00253
2591.34	0.001363	0.002036	0.002346	0.002521
2578.82	0.001372	0.002061	0.002324	0.002502
2566.38	0.001382	0.002092	0.002319	0.002517
2554.03	0.001348	0.002116	0.002353	0.002537
2541.76	0.001299	0.00204	0.002347	0.002559
2529.56	0.001301	0.001992	0.00234	0.002582
2517.45	0.001311	0.002019	0.002351	0.002568
2505.43	0.001291	0.002043	0.002341	0.002548
2493.48	0.001264	0.00197	0.002342	0.002576
2481.61	0.001258	0.002013	0.002363	0.002613
2469.81	0.001313	0.00206	0.002367	0.002618
2458.1	0.00134	0.00198	0.002313	0.002625
2446.47	0.001289	0.001942	0.002298	0.002632
2434.91	0.001284	0.002048	0.00234	0.002623
2423.42	0.001336	0.002041	0.002334	0.002649
2412.01	0.001327	0.002035	0.002308	0.002672
2400.68	0.001259	0.002053	0.002337	0.002642
2389.42	0.001249	0.001988	0.002364	0.002614
2378.24	0.001241	0.001909	0.002337	0.002623
2367.12	0.001192	0.001997	0.002375	0.002654
2356.09	0.001173	0.001975	0.002355	0.002647
2345.12	0.001194	0.001999	0.002273	0.00262
2334.22	0.001249	0.001965	0.002248	0.002613
2323.4	0.001256	0.002068	0.002292	0.002603
2312.64	0.001228	0.002041	0.00226	0.002593
2301.96	0.001216	0.001956	0.002252	0.002569
2291.34	0.001216	0.001956	0.002295	0.002552
2280.79	0.001247	0.001976	0.00231	0.002562
2270.31	0.001257	0.001885	0.00229	0.002605
2259.9	0.001223	0.00185	0.0023	0.002653
2249.55	0.001204	0.001925	0.002322	0.002654
2239.27	0.00121	0.001906	0.002347	0.002655
2229.06	0.001196	0.001901	0.002326	0.002638
2218.91	0.001174	0.001902	0.002336	0.002598
2208.83	0.001167	0.001962	0.002381	0.002602
2198.81	0.001187	0.001901	0.002336	0.002641
2188.85	0.00123	0.00168	0.002311	0.002652
2178.96	0.001251	0.001695	0.002353	0.002643
2169.12	0.0013	0.001761	0.002366	0.002633
2159.36	0.001322	0.001853	0.002343	0.002625
2149.65	0.00129	0.001882	0.002312	0.002631
2140	0.001252	0.001852	0.002294	0.002635
2130.41	0.001225	0.00187	0.002347	0.002664
2120.89	0.001221	0.00181	0.002325	0.002737
2111.42	0.001257	0.001904	0.002323	0.002758
2102.01	0.00129	0.001848	0.002346	0.002743
2092.66	0.001296	0.001856	0.002318	0.002748
2083.36	0.001294	0.00193	0.002347	0.002728
2074.13	0.001269	0.001876	0.002374	0.002721
2064.95	0.001227	0.00182	0.002342	0.002727
2055.82	0.001217	0.001796	0.002302	0.002702
2046.76	0.001221	0.001927	0.002322	0.002694
2037.74	0.001212	0.001846	0.00234	0.002732
2028.79	0.001235	0.001883	0.002338	0.002779
2019.88	0.001265	0.001885	0.002296	0.002792
2011.03	0.001251	0.001917	0.00229	0.002796
2002.24	0.001283	0.00194	0.00224	0.002808
1993.49	0.001332	0.00192	0.002204	0.002817
1984.8	0.001329	0.001942	0.00225	0.00284
1976.16	0.00132	0.001853	0.002335	0.002871
1967.57	0.00132	0.0019	0.002372	0.002893
1959.03	0.001292	0.001865	0.002359	0.002885
1950.54	0.001261	0.00181	0.002291	0.002828
1942.11	0.001236	0.001829	0.002328	0.002791
1933.72	0.00113	0.001872	0.002338	0.002788
1925.38	0.001024	0.001899	0.002322	0.002771
1917.09	0.000989	0.001848	0.002304	0.002769
1908.84	0.001018	0.001804	0.002289	0.002753
1900.65	0.001077	0.001825	0.002295	0.00277
1892.5	0.001124	0.001823	0.002257	0.002823
1884.4	0.001135	0.00186	0.002228	0.002836
1876.34	0.001126	0.001774	0.002247	0.002826
1868.33	0.001139	0.001796	0.002256	0.002807
1860.37	0.001131	0.001846	0.002256	0.00277
1852.44	0.001072	0.001794	0.002272	0.00274
1844.57	0.001034	0.001717	0.002264	0.002734
1836.74	0.001051	0.00175	0.002225	0.00275
1828.95	0.001068	0.001717	0.002245	0.002784
1821.2	0.001062	0.00169	0.002218	0.002809
1813.5	0.001045	0.001695	0.002204	0.002827
1805.84	0.001027	0.001655	0.002186	0.00283
1798.22	0.001011	0.001629	0.002183	0.002789
1790.65	0.001003	0.001612	0.002223	0.002747
1783.11	0.001016	0.001588	0.002212	0.00273
1775.62	0.001024	0.001674	0.002174	0.002734
1768.16	0.001008	0.001628	0.002165	0.002746
1760.75	0.000974	0.001686	0.002218	0.002773
1753.37	0.000926	0.00167	0.002217	0.002768
1746.03	0.000891	0.00158	0.002205	0.002734
1738.74	0.000883	0.001575	0.002178	0.002745
1731.48	0.000891	0.001648	0.002122	0.002743
1724.25	0.000909	0.001636	0.002029	0.002691
1717.07	0.000935	0.001634	0.001996	0.002647
1709.92	0.000967	0.001564	0.001955	0.002604
1702.81	0.000964	0.001561	0.001959	0.002575
1695.73	0.000909	0.001588	0.002062	0.00253
1688.7	0.000892	0.001582	0.002085	0.002493
1681.69	0.000922	0.001585	0.002112	0.002493
1674.72	0.000931	0.001579	0.002155	0.002501
1667.79	0.000931	0.001537	0.00214	0.002497
1660.89	0.000956	0.001565	0.002101	0.002469
1654.03	0.000954	0.001526	0.002109	0.002433
1647.19	0.000928	0.001543	0.002107	0.002448
1640.4	0.000882	0.001527	0.002086	0.002501
1633.63	0.000903	0.001499	0.00206	0.002542
1626.9	0.000957	0.001521	0.002029	0.00257
1620.2	0.000951	0.001469	0.002039	0.002571
1613.53	0.000926	0.001541	0.00206	0.002557
1606.89	0.000898	0.001476	0.002047	0.002545
1600.29	0.00086	0.001452	0.001977	0.002514
1593.71	0.000802	0.0014	0.001998	0.002493
1587.17	0.000786	0.001428	0.001993	0.0025
1580.65	0.000807	0.001395	0.002011	0.00251
1574.17	0.000811	0.001471	0.002027	0.002495
1567.71	0.000797	0.001436	0.002016	0.002454
1561.29	0.000752	0.001357	0.002	0.002431
1554.89	0.000716	0.0014	0.002006	0.002454
1548.53	0.000726	0.001413	0.001982	0.002473
1542.18	0.000742	0.001382	0.002	0.002452
1535.87	0.000747	0.001377	0.002021	0.002397
1529.59	0.00075	0.001404	0.002019	0.002359
1523.33	0.000754	0.001415	0.001986	0.002404
1517.1	0.000731	0.001365	0.00201	0.002491
1510.9	0.000725	0.001407	0.002008	0.002525
1504.72	0.000766	0.001355	0.001979	0.002485
1498.57	0.000783	0.001352	0.001982	0.002408
1492.45	0.00073	0.001336	0.001962	0.002353
1486.35	0.000687	0.001316	0.001889	0.002337
1480.27	0.000706	0.001323	0.001841	0.002331
1474.22	0.00072	0.001258	0.00183	0.002316
1468.2	0.000689	0.001256	0.001846	0.002316
1462.2	0.000694	0.001268	0.001851	0.002306
1456.22	0.000714	0.001299	0.001843	0.002254
1450.27	0.000696	0.00121	0.001821	0.002203
1444.34	0.000684	0.001287	0.001833	0.002183
1438.43	0.000689	0.001301	0.001844	0.002169
1432.55	0.000653	0.001229	0.001824	0.002166
1426.69	0.000523	0.001186	0.001784	0.002192
1420.85	0.000278	0.001216	0.001792	0.0022
1415.04	0.000113	0.001231	0.001839	0.00217
1409.25	0.000207	0.001251	0.001894	0.00215
1403.47	0.000438	0.001249	0.001877	0.002152
1397.72	0.000591	0.00118	0.00184	0.002154
1391.99	0.000622	0.001203	0.001815	0.002157
1386.29	0.000611	0.001144	0.001817	0.002141
1380.6	0.000612	0.001153	0.001819	0.002077
1374.93	0.000614	0.0011	0.001819	0.00204
1369.29	0.000602	0.001168	0.001864	0.00206
1363.66	0.000617	0.001117	0.00192	0.00208
1358.05	0.000633	0.001097	0.001869	0.002083
1352.46	0.000616	0.001087	0.001806	0.00207
1346.9	0.000622	0.001132	0.00176	0.002064
1341.35	0.000617	0.001139	0.001723	0.002065
1335.82	0.000596	0.001104	0.001698	0.002062
1330.31	0.000597	0.001134	0.001685	0.002065
1324.81	0.000598	0.001111	0.001653	0.002073
1319.34	0.000575	0.001124	0.001651	0.002078
1313.88	0.000571	0.00113	0.001683	0.00207
1308.44	0.00058	0.001111	0.00171	0.00204
1303.02	0.000569	0.001085	0.00174	0.002045
1297.62	0.000533	0.00104	0.001695	0.002123
1292.23	0.000511	0.001001	0.001659	0.002191
1286.86	0.000511	0.001093	0.00167	0.002177
1281.51	0.000527	0.001133	0.001655	0.002094
1276.17	0.000538	0.001029	0.001604	0.002028
1270.85	0.000541	0.000988	0.001575	0.002011
1265.54	0.000534	0.001005	0.001566	0.001986
1260.26	0.000518	0.000963	0.001578	0.001952
1254.98	0.000513	0.000959	0.001581	0.001952
1249.73	0.000528	0.001012	0.001587	0.001966
1244.49	0.000534	0.000983	0.001572	0.001971
1239.26	0.000526	0.000958	0.001528	0.001986
1234.05	0.000524	0.000913	0.001487	0.002011
1228.86	0.000538	0.000931	0.00148	0.002028
1223.67	0.000546	0.000924	0.001495	0.002037
1218.51	0.000532	0.000938	0.001482	0.002025
1213.36	0.000516	0.000866	0.001443	0.00199
1208.22	0.000505	0.000883	0.001398	0.001956
1203.1	0.000494	0.000894	0.001366	0.001922
1197.99	0.000482	0.000874	0.001379	0.001904
1192.89	0.000464	0.00086	0.001395	0.001926
1187.81	0.000437	0.000865	0.001455	0.001953
1182.75	0.000427	0.000813	0.001463	0.001938
1177.69	0.000429	0.000791	0.001429	0.001913
1172.65	0.000426	0.000819	0.001381	0.00193
1167.62	0.000441	0.000788	0.0013	0.001952
1162.61	0.000453	0.000776	0.00126	0.001923
1157.61	0.000453	0.000761	0.001276	0.001872
1152.62	0.000432	0.000765	0.001306	0.001835
1147.64	0.00041	0.000779	0.001329	0.001802
1142.68	0.000389	0.00074	0.001357	0.001797
1137.73	0.000371	0.000736	0.001334	0.001805
1132.79	0.000377	0.00073	0.001293	0.001761
1127.87	0.000404	0.000716	0.001287	0.001703
1122.95	0.000405	0.000733	0.001301	0.001682
1118.05	0.000378	0.000688	0.001253	0.001691
1113.16	0.000343	0.000688	0.001191	0.001704
1108.28	0.000324	0.000723	0.001157	0.001685
1103.42	0.000323	0.000696	0.001134	0.001649
1098.56	0.000321	0.000654	0.001123	0.001649
1093.72	0.000328	0.000675	0.001127	0.001663
1088.89	0.000356	0.000637	0.001127	0.001661
1084.07	0.000394	0.000666	0.001102	0.00164
1079.26	0.000421	0.000622	0.001081	0.001594
1074.46	0.000404	0.000623	0.001068	0.001531
1069.67	0.000369	0.000675	0.001045	0.001473
1064.9	0.000334	0.000617	0.001049	0.001444
1060.13	0.000312	0.00061	0.001093	0.001428
1055.38	0.000303	0.000592	0.00109	0.001402
1050.64	0.00031	0.000616	0.00108	0.00139
1045.9	0.000318	0.000633	0.001088	0.001401
1041.18	0.000299	0.00058	0.001101	0.001388
1036.47	0.000276	0.000611	0.001098	0.001345
1031.77	0.000274	0.000622	0.001038	0.001317
1027.08	0.000294	0.000539	0.000987	0.001291
1022.4	0.000302	0.000512	0.000974	0.001253
1017.74	0.000294	0.000545	0.000986	0.00122
1013.08	0.000292	0.000553	0.000978	0.001207
1008.43	0.000287	0.000513	0.000967	0.00121
1003.79	0.000285	0.000518	0.000925	0.001187
999.165	0.000302	0.000522	0.000848	0.001148
994.548	0.000329	0.000492	0.000805	0.00115
989.942	0.000321	0.000465	0.000803	0.001167
985.346	0.000269	0.000474	0.000813	0.001139
980.759	0.000221	0.000458	0.000837	0.001078
976.183	0.000207	0.000461	0.000877	0.001046
971.617	0.000218	0.000431	0.000883	0.001068
967.062	0.000236	0.000473	0.00085	0.00108
962.516	0.000246	0.000469	0.000813	0.001043
957.981	0.000237	0.00046	0.00078	0.00099
953.455	0.000226	0.000463	0.000779	0.000973
948.94	0.000221	0.000432	0.000782	0.000951
944.435	0.000196	0.000428	0.000756	0.000909
939.94	0.000165	0.000469	0.000731	0.000883
935.454	0.000156	0.000427	0.000728	0.000882
930.979	0.000176	0.000398	0.000737	0.000858
926.514	0.000199	0.000383	0.00076	0.000828
922.059	0.00021	0.000341	0.000769	0.000835
917.615	0.000201	0.000371	0.000765	0.000814
913.18	0.000192	0.000401	0.000769	0.000782
908.756	0.000201	0.000407	0.000738	0.000788
904.341	0.000201	0.000441	0.000715	0.000803
899.938	0.000197	0.000438	0.000708	0.000775
895.544	0.000218	0.0004	0.000696	0.00072
891.16	0.000246	0.000378	0.000697	0.000699
886.787	0.000253	0.000391	0.000683	0.000678
882.424	0.000231	0.000383	0.00066	0.000668
878.071	0.000203	0.00035	0.000631	0.000702
873.729	0.000187	0.000365	0.000631	0.000718
869.397	0.000175	0.000379	0.000653	0.00068
865.076	0.000165	0.000376	0.000631	0.000634
860.765	0.000155	0.000371	0.000609	0.000615
856.465	0.000151	0.000345	0.00061	0.000621
852.175	0.000163	0.000359	0.000594	0.000615
847.896	0.000186	0.000359	0.000602	0.000581
843.629	0.000192	0.000359	0.000611	0.000557
839.371	0.000175	0.000378	0.000623	0.000546
835.125	0.00016	0.000403	0.000639	0.00053
830.889	0.000156	0.000365	0.000622	0.000515
826.665	0.00016	0.000331	0.000623	0.000498
822.452	0.000166	0.000349	0.000616	0.000485
818.25	0.000166	0.000356	0.000594	0.00047
814.059	0.000173	0.000338	0.000564	0.000445
809.879	0.00018	0.000338	0.000575	0.000448
805.711	0.000165	0.000314	0.000577	0.000465
801.555	0.000147	0.000296	0.000553	0.000475

## Sheet: Fig. 4G
	reaction temperature
bp	25 °C	30 °C	37 °C	42 °C
8635.69	0.00043	0.000512	0.000375	0.000518
8577.23	0.000631	0.000377	0.000454	0.000482
8519.17	0.000765	0.000404	0.000392	0.000391
8461.48	0.000742	0.00066	0.000389	0.000323
8404.18	0.000814	0.000554	0.000395	0.00031
8347.26	0.000979	0.000757	0.000399	0.000258
8290.72	0.000801	0.000613	0.000386	0.000369
8234.56	0.000914	0.000684	0.000439	0.000422
8178.77	0.001047	0.000573	0.000407	0.000575
8123.35	0.001039	0.000616	0.000517	0.000626
8068.31	0.000963	0.000714	0.000585	0.00064
8013.64	0.001177	0.00095	0.000628	0.000651
7959.33	0.001312	0.000918	0.000708	0.000712
7905.39	0.001198	0.0008	0.000603	0.000646
7851.81	0.001337	0.001148	0.00061	0.000813
7798.6	0.001594	0.001159	0.000655	0.000781
7745.74	0.001923	0.001007	0.000715	0.000715
7693.25	0.001936	0.001346	0.000919	0.0009
7641.11	0.002076	0.001352	0.001064	0.000816
7589.33	0.002209	0.001604	0.001178	0.000936
7537.9	0.002412	0.001853	0.001215	0.001031
7486.81	0.002459	0.002123	0.001643	0.001152
7436.08	0.002786	0.002496	0.001766	0.001437
7385.7	0.002977	0.002768	0.001992	0.00158
7335.66	0.003192	0.003382	0.002301	0.001898
7285.97	0.003436	0.003375	0.002527	0.002042
7236.62	0.003548	0.003848	0.002861	0.002199
7187.6	0.00398	0.004775	0.003129	0.002409
7138.93	0.004443	0.005308	0.003602	0.002561
7090.59	0.004752	0.005863	0.003773	0.002713
7042.59	0.005333	0.005901	0.003905	0.002961
6994.92	0.006	0.006882	0.004259	0.003342
6947.58	0.006227	0.007257	0.004711	0.003567
6900.57	0.006861	0.007882	0.004609	0.003476
6853.89	0.007219	0.008246	0.004723	0.003582
6807.54	0.008003	0.008286	0.004837	0.003673
6761.51	0.008405	0.008837	0.004963	0.00375
6715.8	0.00872	0.008884	0.005173	0.003865
6670.41	0.009253	0.008781	0.005161	0.00376
6625.34	0.009849	0.009055	0.004609	0.003643
6580.59	0.010247	0.008725	0.004485	0.003355
6536.15	0.010619	0.008667	0.003836	0.002817
6492.03	0.010854	0.007982	0.003071	0.002409
6448.22	0.010625	0.007227	0.002311	0.00169
6404.72	0.010699	0.006179	0.001415	0.001222
6361.52	0.01028	0.004666	0.001107	0.00082
6318.64	0.009685	0.003328	0.000978	0.000582
6276.06	0.009028	0.002222	0.000805	0.000423
6233.78	0.007987	0.001665	0.000812	0.00031
6191.8	0.006672	0.001267	0.000798	0.000425
6150.13	0.004981	0.000975	0.000554	0.000289
6108.75	0.003618	0.001036	0.00075	0.000356
6067.67	0.002373	0.000866	0.000518	0.000215
6026.89	0.002009	0.000936	0.000731	0.000427
5986.39	0.001294	0.001043	0.000512	0.000412
5946.19	0.001183	0.001018	0.000621	0.000518
5906.28	0.001091	0.001044	0.000568	0.000274
5866.66	0.001239	0.00121	0.000685	0.000244
5827.33	0.001102	0.001222	0.000674	0.000322
5788.28	0.001505	0.001167	0.000719	0.000522
5749.51	0.001379	0.001236	0.000758	0.000414
5711.02	0.001534	0.001247	0.000687	0.000388
5672.82	0.001559	0.001385	0.000765	0.000357
5634.89	0.001688	0.001372	0.000768	0.000446
5597.24	0.001553	0.001484	0.000676	0.000321
5559.87	0.001679	0.001295	0.000916	0.000532
5522.77	0.001854	0.00147	0.000899	0.000535
5485.94	0.001628	0.001349	0.001049	0.000516
5449.38	0.001819	0.001476	0.001135	0.00056
5413.09	0.001798	0.001535	0.00084	0.000369
5377.07	0.001866	0.001568	0.000771	0.000241
5341.31	0.002199	0.001969	0.001053	0.00047
5305.82	0.001777	0.001926	0.001232	0.000468
5270.59	0.001925	0.002062	0.001171	0.000492
5235.62	0.002649	0.002085	0.001202	0.000525
5200.91	0.00251	0.002141	0.001316	0.000603
5166.46	0.002507	0.002684	0.001411	0.000632
5132.26	0.002866	0.002588	0.00136	0.000629
5098.32	0.003063	0.003004	0.001568	0.000672
5064.63	0.002989	0.003081	0.001918	0.000726
5031.19	0.003256	0.00348	0.001953	0.000848
4998.01	0.003385	0.003851	0.002015	0.000906
4965.07	0.003373	0.0043	0.002411	0.00103
4932.38	0.00367	0.004914	0.00242	0.001151
4899.93	0.004087	0.005249	0.002916	0.001155
4867.73	0.004232	0.005819	0.003165	0.001368
4835.77	0.004899	0.006097	0.003346	0.0015
4804.05	0.00539	0.006268	0.003611	0.001642
4772.57	0.006086	0.006965	0.003748	0.001731
4741.33	0.006553	0.007267	0.004273	0.001883
4710.33	0.006739	0.007453	0.004294	0.002123
4679.56	0.007319	0.007664	0.004775	0.002183
4649.02	0.007701	0.008196	0.004871	0.002453
4618.72	0.007817	0.008395	0.005117	0.002429
4588.65	0.008124	0.008717	0.005271	0.002647
4558.8	0.008737	0.008881	0.005583	0.00285
4529.19	0.00915	0.009057	0.005842	0.003042
4499.79	0.009114	0.009128	0.006186	0.002828
4470.63	0.009413	0.008999	0.006297	0.003118
4441.69	0.009434	0.008707	0.006062	0.003383
4412.96	0.009424	0.008839	0.006165	0.003414
4384.46	0.009003	0.008117	0.005813	0.003211
4356.18	0.008305	0.00753	0.005471	0.003377
4328.12	0.007733	0.007117	0.005115	0.003307
4300.27	0.006671	0.006599	0.00503	0.003196
4272.64	0.006013	0.005797	0.004592	0.003008
4245.22	0.005716	0.005468	0.0044	0.003162
4218.01	0.004766	0.004962	0.003925	0.002682
4191.01	0.004356	0.004902	0.003849	0.002536
4164.22	0.004032	0.004691	0.00374	0.00237
4137.64	0.003894	0.004434	0.003656	0.002187
4111.26	0.003467	0.004234	0.00346	0.001944
4085.09	0.003506	0.003874	0.003179	0.002021
4059.13	0.003576	0.003776	0.003452	0.002001
4033.36	0.003137	0.003718	0.00299	0.00202
4007.8	0.003181	0.00352	0.003146	0.002211
3982.43	0.002919	0.003419	0.003219	0.002012
3957.26	0.002801	0.003371	0.002985	0.001967
3932.29	0.002679	0.00326	0.002761	0.00181
3907.52	0.002806	0.003071	0.002982	0.002043
3882.94	0.002662	0.00293	0.002893	0.00208
3858.55	0.002592	0.00321	0.002891	0.001995
3834.35	0.002701	0.003016	0.003026	0.002038
3810.34	0.002539	0.002793	0.003084	0.001913
3786.53	0.002685	0.003014	0.00294	0.00196
3762.89	0.002445	0.002851	0.002812	0.002057
3739.45	0.002634	0.003063	0.002679	0.001866
3716.19	0.002951	0.002694	0.002612	0.002042
3693.11	0.002375	0.002995	0.002701	0.002141
3670.21	0.002552	0.003046	0.002847	0.001905
3647.5	0.002685	0.002746	0.002857	0.001965
3624.96	0.002833	0.002823	0.002598	0.002035
3602.61	0.002747	0.002832	0.002825	0.002126
3580.43	0.002816	0.003038	0.00259	0.002055
3558.42	0.002919	0.002956	0.002956	0.002092
3536.59	0.002853	0.003181	0.002876	0.002039
3514.94	0.003172	0.003133	0.002929	0.002001
3493.45	0.003274	0.003245	0.003009	0.001942
3472.14	0.003329	0.003246	0.002985	0.002191
3450.99	0.003415	0.003323	0.002803	0.002057
3430.01	0.003445	0.003616	0.002741	0.002295
3409.2	0.003473	0.003863	0.002966	0.002158
3388.56	0.003798	0.003824	0.002971	0.002169
3368.08	0.004049	0.004345	0.003363	0.002326
3347.76	0.004197	0.004581	0.003249	0.002103
3327.61	0.004214	0.004736	0.003216	0.00208
3307.61	0.004964	0.005006	0.003512	0.002377
3287.78	0.005365	0.005349	0.003452	0.002391
3268.1	0.005918	0.005851	0.003659	0.002227
3248.58	0.006598	0.006181	0.003448	0.002705
3229.21	0.007379	0.006541	0.003599	0.002681
3210.01	0.007865	0.006554	0.003932	0.002639
3190.95	0.008801	0.006755	0.004151	0.002576
3172.05	0.00898	0.006944	0.003856	0.002855
3153.29	0.009574	0.006992	0.00377	0.002918
3134.69	0.009712	0.007165	0.003733	0.0028
3116.24	0.010018	0.007407	0.004149	0.002745
3097.93	0.010184	0.007259	0.004225	0.002686
3079.77	0.010442	0.007681	0.004088	0.00266
3061.76	0.010487	0.007963	0.004264	0.00266
3043.89	0.011015	0.007605	0.00411	0.002811
3026.16	0.010929	0.007726	0.004131	0.002896
3008.58	0.010668	0.007282	0.004099	0.002986
2991.13	0.010735	0.006899	0.003912	0.002906
2973.83	0.010089	0.00624	0.003876	0.002997
2956.66	0.009535	0.005711	0.003581	0.00276
2939.63	0.008168	0.004525	0.003431	0.002789
2922.74	0.006823	0.003974	0.003451	0.002814
2905.98	0.00556	0.003169	0.0031	0.002819
2889.36	0.004259	0.002701	0.002822	0.002577
2872.87	0.003351	0.002359	0.002843	0.002405
2856.51	0.00256	0.002033	0.002758	0.00246
2840.28	0.002081	0.002197	0.002703	0.002359
2824.19	0.001659	0.002156	0.002604	0.002418
2808.22	0.001251	0.001827	0.002642	0.002278
2792.38	0.001328	0.001945	0.00266	0.002289
2776.66	0.001251	0.00191	0.00287	0.002373
2761.07	0.001267	0.001918	0.002835	0.002262
2745.61	0.001086	0.001912	0.00268	0.002225
2730.26	0.001058	0.001874	0.002457	0.002419
2715.05	0.001185	0.001709	0.002485	0.002287
2699.95	0.001201	0.001834	0.00237	0.002383
2684.97	0.001445	0.001672	0.00245	0.002403
2670.11	0.001194	0.001893	0.002621	0.002102
2655.37	0.00121	0.001747	0.002567	0.002223
2640.75	0.001262	0.001806	0.002564	0.00251
2626.24	0.001095	0.001606	0.00266	0.002279
2611.84	0.001138	0.001742	0.002341	0.002282
2597.57	0.00127	0.001893	0.002573	0.002387
2583.4	0.001134	0.001764	0.002679	0.002453
2569.35	0.001321	0.00191	0.002455	0.00257
2555.4	0.001149	0.001806	0.002505	0.002539
2541.57	0.001021	0.001705	0.002505	0.002523
2527.85	0.001135	0.001889	0.002553	0.002358
2514.23	0.001011	0.001737	0.002368	0.002557
2500.73	0.000992	0.001819	0.00241	0.00238
2487.32	0.001232	0.001929	0.002491	0.002423
2474.03	0.001083	0.001832	0.002505	0.002452
2460.83	0.001023	0.001804	0.002667	0.002232
2447.75	0.001146	0.001618	0.002491	0.002336
2434.76	0.000906	0.001733	0.002338	0.002489
2421.87	0.001096	0.001646	0.002829	0.002714
2409.09	0.00112	0.001492	0.002588	0.002679
2396.4	0.001098	0.001456	0.002428	0.00255
2383.82	0.000984	0.001876	0.002543	0.002594
2371.33	0.001046	0.001593	0.002404	0.002376
2358.93	0.00095	0.001527	0.002669	0.002558
2346.64	0.001042	0.001654	0.002663	0.002659
2334.44	0.000982	0.001736	0.002546	0.002716
2322.33	0.001192	0.001641	0.00276	0.002673
2310.31	0.001105	0.001673	0.002449	0.002697
2298.39	0.001048	0.001558	0.002461	0.002796
2286.56	0.00095	0.001691	0.002579	0.002743
2274.82	0.001194	0.001617	0.002608	0.002724
2263.17	0.001082	0.001529	0.002596	0.002577
2251.61	0.001027	0.001523	0.002518	0.002557
2240.13	0.000981	0.001649	0.002345	0.002727
2228.74	0.000866	0.001591	0.00232	0.002639
2217.44	0.000831	0.001665	0.002369	0.002599
2206.22	0.001049	0.001364	0.002256	0.002695
2195.09	0.001116	0.001548	0.002297	0.002524
2184.04	0.00108	0.001665	0.002478	0.002647
2173.08	0.001063	0.00165	0.002634	0.002832
2162.19	0.000944	0.001564	0.002359	0.002878
2151.39	0.000887	0.00146	0.002241	0.002825
2140.67	0.001055	0.001633	0.002441	0.002613
2130.03	0.000958	0.001463	0.002218	0.002737
2119.46	0.001095	0.001512	0.002301	0.002736
2108.97	0.000855	0.001449	0.002598	0.002583
2098.56	0.000858	0.001588	0.002342	0.002681
2088.23	0.000823	0.001562	0.002405	0.002774
2077.97	0.000802	0.001565	0.002562	0.002757
2067.79	0.001061	0.001697	0.002495	0.002808
2057.67	0.001013	0.001623	0.002382	0.002987
2047.64	0.000713	0.001584	0.002568	0.002925
2037.67	0.000919	0.001409	0.00254	0.003003
2027.78	0.000964	0.001477	0.002447	0.002893
2017.95	0.000876	0.001522	0.002586	0.002818
2008.2	0.000868	0.001418	0.002434	0.002863
1998.52	0.000891	0.0014	0.00237	0.002824
1988.9	0.000809	0.001395	0.002611	0.002855
1979.35	0.001103	0.001415	0.002451	0.002927
1969.87	0.001002	0.001484	0.002335	0.003011
1960.46	0.000783	0.001626	0.002584	0.002862
1951.11	0.000864	0.001665	0.002559	0.003103
1941.82	0.00083	0.001536	0.002545	0.003238
1932.6	0.000822	0.001731	0.002555	0.003229
1923.44	0.000879	0.001519	0.0025	0.003175
1914.35	0.001129	0.00157	0.002573	0.002952
1905.31	0.001078	0.001467	0.002658	0.002978
1896.34	0.001063	0.001541	0.002519	0.00312
1887.43	0.000997	0.001407	0.002472	0.003086
1878.58	0.00092	0.001472	0.00239	0.003064
1869.78	0.001215	0.001245	0.002487	0.003234
1861.05	0.000982	0.001522	0.002571	0.003291
1852.37	0.001042	0.001481	0.002534	0.003295
1843.75	0.00114	0.001711	0.002529	0.003479
1835.19	0.001104	0.001805	0.002206	0.003549
1826.68	0.001284	0.0014	0.00251	0.003453
1818.23	0.001048	0.001517	0.002454	0.003222
1809.83	0.001071	0.001519	0.002299	0.003214
1801.48	0.000961	0.001414	0.002314	0.00333
1793.19	0.000961	0.001471	0.00214	0.00336
1784.95	0.000991	0.001518	0.002297	0.003533
1776.77	0.000781	0.001395	0.002501	0.003542
1768.63	0.000958	0.001302	0.002281	0.003474
1760.54	0.001026	0.001339	0.00241	0.003467
1752.51	0.000924	0.001347	0.00242	0.003557
1744.52	0.000872	0.001438	0.002437	0.003393
1736.58	0.000738	0.00136	0.002419	0.003449
1728.69	0.000974	0.001262	0.002448	0.003519
1720.85	0.000842	0.001362	0.002533	0.003465
1713.05	0.000773	0.001376	0.00254	0.003307
1705.31	0.000743	0.001337	0.002357	0.003604
1697.6	0.000748	0.001178	0.002408	0.00362
1689.94	0.000734	0.001377	0.002572	0.003409
1682.33	0.000737	0.001415	0.002416	0.003341
1674.76	0.000796	0.001225	0.002289	0.003122
1667.23	0.000764	0.001166	0.002339	0.003376
1659.75	0.000804	0.001378	0.002386	0.003355
1652.31	0.000836	0.001157	0.002187	0.003106
1644.91	0.000843	0.001187	0.002146	0.003101
1637.55	0.000659	0.001339	0.002199	0.003095
1630.24	0.000685	0.001335	0.00232	0.002989
1622.96	0.000654	0.001264	0.002167	0.002989
1615.72	0.000554	0.000872	0.002121	0.002969
1608.52	0.000699	0.00121	0.002173	0.003052
1601.36	0.000781	0.00108	0.002029	0.003121
1594.24	0.000644	0.001021	0.002062	0.002915
1587.16	0.000786	0.000968	0.002068	0.003019
1580.11	0.000784	0.000965	0.001969	0.003073
1573.1	0.000624	0.001099	0.002158	0.003061
1566.13	0.00058	0.001162	0.002148	0.003055
1559.19	0.000702	0.001122	0.002036	0.003113
1552.28	0.000422	0.000984	0.002173	0.003106
1545.41	0.000332	0.001105	0.002105	0.003016
1538.58	0.00041	0.001083	0.002049	0.002884
1531.78	0.000572	0.000963	0.002039	0.002743
1525.01	0.000621	0.001064	0.002133	0.002774
1518.27	0.000843	0.001035	0.001964	0.002806
1511.57	0.000738	0.000927	0.002102	0.002811
1504.9	0.000574	0.001015	0.002061	0.002837
1498.26	0.000538	0.000709	0.002085	0.002754
1491.65	0.000503	0.000851	0.002052	0.002838
1485.07	0.000552	0.000945	0.001946	0.00279
1478.52	0.000627	0.001004	0.002019	0.002665
1472	0.000547	0.001014	0.002012	0.002759
1465.51	0.000488	0.00083	0.001989	0.002899
1459.05	0.000442	0.000918	0.001977	0.002746
1452.62	0.000438	0.001004	0.001943	0.002625
1446.22	0.000378	0.001049	0.00191	0.002769
1439.84	0.000454	0.000808	0.001979	0.002681
1433.49	0.000501	0.00094	0.001904	0.002661
1427.17	0.000589	0.000927	0.00177	0.002925
1420.87	0.00057	0.000896	0.001894	0.002833
1414.6	0.000453	0.001066	0.001837	0.002859
1408.35	0.000408	0.001185	0.00186	0.002983
1402.13	0.000551	0.0009	0.00186	0.00295
1395.94	0.0005	0.000915	0.00177	0.002782
1389.77	0.000479	0.001224	0.001849	0.002743
1383.62	0.000576	0.001058	0.001912	0.00276
1377.5	0.000515	0.001056	0.001895	0.002922
1371.4	0.000398	0.00089	0.00184	0.003272
1365.33	0.000486	0.000878	0.001723	0.003133
1359.27	0.000467	0.000801	0.001734	0.003028
1353.24	0.000393	0.000803	0.001706	0.002957
1347.23	0.000658	0.000783	0.001756	0.002742
1341.25	0.000591	0.000712	0.001526	0.00289
1335.28	0.000503	0.000714	0.001588	0.003021
1329.34	0.00057	0.000897	0.001663	0.00303
1323.42	0.000491	0.000877	0.001656	0.002927
1317.51	0.000417	0.000636	0.001681	0.00275
1311.63	0.000419	0.000682	0.001721	0.002665
1305.77	0.000369	0.000696	0.001618	0.002597
1299.93	0.000456	0.000691	0.001602	0.002639
1294.1	0.000403	0.000689	0.00161	0.002781
1288.3	0.000501	0.000674	0.0016	0.002814
1282.52	0.000589	0.000584	0.001659	0.00271
1276.75	0.000388	0.000583	0.001637	0.002715
1271	0.000344	0.000688	0.00153	0.002724
1265.27	0.000444	0.00064	0.001496	0.002516
1259.56	0.000377	0.000728	0.001353	0.002586
1253.87	0.000584	0.000721	0.001515	0.002682
1248.19	0.000222	0.000716	0.001599	0.002643
1242.53	0.000336	0.000576	0.001517	0.002527
1236.88	0.000421	0.000613	0.001508	0.002563
1231.26	0.000386	0.000506	0.001366	0.00253
1225.65	0.000253	0.000417	0.001421	0.002444
1220.05	0.000228	0.000525	0.001398	0.002594
1214.48	0.000206	0.000668	0.001679	0.0025
1208.91	0.000299	0.000619	0.001576	0.002426
1203.37	0.000283	0.000647	0.001381	0.002481
1197.83	0.000412	0.000622	0.001377	0.002476
1192.32	0.000331	0.00056	0.00143	0.002462
1186.82	0.000299	0.000638	0.001407	0.002327
1181.33	0.000316	0.000633	0.001311	0.002256
1175.86	0.00033	0.000587	0.001276	0.002212
1170.4	0.000302	0.000665	0.001261	0.002303
1164.96	0.000376	0.000556	0.00142	0.002379
1159.53	0.000319	0.000502	0.001372	0.002238
1154.11	0.000408	0.000588	0.00137	0.002314
1148.71	0.000326	0.000602	0.001289	0.002376
1143.32	0.000305	0.00064	0.001177	0.002297
1137.95	0.000268	0.000567	0.001192	0.002322
1132.59	0.000311	0.000483	0.001243	0.00227
1127.24	0.000254	0.000671	0.00125	0.002283
1121.91	0.000299	0.000621	0.001189	0.002205
1116.58	0.000257	0.000568	0.001206	0.002005
1111.28	0.000395	0.000542	0.001144	0.002141
1105.98	0.000434	0.000479	0.001204	0.002195
1100.7	0.00039	0.000551	0.001158	0.002053
1095.42	0.000396	0.000544	0.001191	0.001901
1090.17	0.000389	0.000451	0.001194	0.001925
1084.92	0.000324	0.000365	0.001112	0.001891
1079.69	0.000419	0.000311	0.001119	0.001712
1074.46	0.000415	0.000348	0.00106	0.001793
1069.25	0.000186	0.000467	0.00103	0.001709
1064.06	0.000228	0.000473	0.000998	0.001806
1058.87	0.000255	0.000376	0.001058	0.00173
1053.69	0.000198	0.000458	0.001117	0.001519
1048.53	0.000204	0.000522	0.001081	0.0016
1043.38	0.000174	0.000462	0.00103	0.001524
1038.24	0.000244	0.00044	0.001056	0.001559
1033.11	0.000317	0.000437	0.001083	0.001381
1028	0.000165	0.000463	0.001006	0.001461
1022.89	0.000146	0.00034	0.000954	0.001409
1017.8	0.000314	0.000292	0.000909	0.001389
1012.72	0.000293	0.000344	0.000971	0.001267
1007.65	0.000214	0.000269	0.000999	0.001372
1002.59	0.00018	0.000309	0.000981	0.001491
997.54	0.000203	0.000345	0.000885	0.001507
992.51	0.000214	0.000366	0.000802	0.001476
987.48	0.000248	0.000312	0.000749	0.001365
982.47	0.000246	0.000268	0.000752	0.001235
977.47	0.000237	0.000267	0.000755	0.001185
972.48	0.000334	0.00025	0.000778	0.001097
967.5	0.000335	0.000325	0.000799	0.001317
962.53	0.000241	0.000405	0.000799	0.00135
957.58	0.000314	0.0003	0.0008	0.001327
952.64	0.000265	0.00035	0.000709	0.00118
947.7	0.000171	0.000393	0.00075	0.001147
942.78	0.000226	0.000365	0.000829	0.00096
937.87	0.000267	0.000346	0.000789	0.001095
932.98	0.00028	0.00023	0.000721	0.00115
928.09	0.00026	0.000341	0.000732	0.001083
923.22	0.000293	0.00034	0.000756	0.001149
918.35	0.000262	0.000346	0.00071	0.001139
913.5	0.000203	0.000407	0.00067	0.001144
908.67	0.00014	0.000343	0.000673	0.001237
903.84	0.000118	0.000407	0.000678	0.001168
899.03	0.000241	0.000352	0.000662	0.001258
894.23	0.000312	0.000312	0.000673	0.001117
889.44	0.000295	0.00021	0.000729	0.001181
884.66	0.000235	0.000175	0.000712	0.001029
879.9	0.000178	0.00012	0.000697	0.001015
875.15	0.000166	8.47e-05	0.000618	0.000948
870.41	0.000258	0.000228	0.000602	0.000996
865.69	0.000264	0.000254	0.000603	0.000792
860.97	0.000172	0.000297	0.000539	0.000859
856.28	0.000143	0.000272	0.000538	0.000768
851.59	0.000184	0.000273	0.000537	0.000858
846.92	0.000206	0.00025	0.000519	0.000781
842.26	0.000226	0.000258	0.000477	0.000727
837.62	0.000187	0.000286	0.000521	0.000719
832.99	0.000133	0.00027	0.000578	0.000614
828.37	0.000198	0.000215	0.000563	0.00071
823.77	0.000232	0.000127	0.000492	0.000529
819.18	0.000164	0.000102	0.000461	0.000612
814.61	0.000123	0.000154	0.000422	0.000539
810.05	8.86e-05	0.000219	0.000513	0.000425
805.51	0.000134	0.000198	0.0005	0.000515
800.98	0.000174	0.000177	0.000506	0.000509
