# Supplementary material for: Cyclic di-GMP as an antitoxin regulates bacterial genome stability and antibiotic persistence in biofilms
Source: eLife. 2024 Oct 4;13:RP99194. doi: 10.7554/eLife.99194 (PMC11452175; doi:10.7554/eLife.99194)
Supplement: Figure 5—source data 2. [file elife-99194-fig5-data2.xlsx]

## Sheet: Fig. 5B
c-di-GMP (μM)	Band intensity
30	1.98759
20	1.93149
10	1.63057
7.5	0.87208
5	0.249898
2.5	0.210012
0	0

## Sheet: Fig. 5G
Supercoiled plasmid
left panel	bp	Control	Gfp	HipH-Gfp		right panel	bp	HipH-Gfp	HipH-Gfp+C-di-Gmp+	HipH-Gfp+C-di-Gmp++
	7756.13	0.002093	0.002056	0.002169			7756.13	0.002169	0.002207	0.002095
	7685.83	0.00216	0.002167	0.002091			7685.83	0.002091	0.002271	0.002036
	7616.04	0.002068	0.002312	0.002151			7616.04	0.002151	0.002118	0.002082
	7546.74	0.001926	0.002226	0.002025			7546.74	0.002025	0.002258	0.002259
	7477.93	0.001989	0.002133	0.002207			7477.93	0.002207	0.0023	0.002244
	7409.62	0.001918	0.002153	0.002364			7409.62	0.002364	0.002351	0.002143
	7341.79	0.002066	0.001977	0.002255			7341.79	0.002255	0.002431	0.002297
	7274.45	0.002249	0.002174	0.002327			7274.45	0.002327	0.002354	0.002422
	7207.6	0.00208	0.002285	0.002229			7207.6	0.002229	0.002709	0.002314
	7141.24	0.002167	0.002088	0.002244			7141.24	0.002244	0.002803	0.002687
	7075.35	0.00232	0.002234	0.002393			7075.35	0.002393	0.002755	0.002848
	7009.95	0.002172	0.002319	0.002504			7009.95	0.002504	0.002813	0.002928
	6945.02	0.002292	0.00217	0.002509			6945.02	0.002509	0.003216	0.003083
	6880.57	0.002259	0.002498	0.002562			6880.57	0.002562	0.003348	0.003435
	6816.6	0.002071	0.002247	0.002775			6816.6	0.002775	0.003747	0.003944
	6753.09	0.002293	0.002321	0.002923			6753.09	0.002923	0.004037	0.004535
	6690.06	0.002455	0.00264	0.003335			6690.06	0.003335	0.004755	0.005263
	6627.5	0.00252	0.002752	0.003625			6627.5	0.003625	0.005312	0.006122
	6565.4	0.002667	0.003114	0.003814			6565.4	0.003814	0.006264	0.007155
	6503.77	0.003118	0.003327	0.004367			6503.77	0.004367	0.007109	0.008232
	6442.6	0.003182	0.003375	0.004831			6442.6	0.004831	0.00812	0.009144
	6381.9	0.003442	0.003879	0.005179			6381.9	0.005179	0.008925	0.009852
	6321.65	0.003836	0.004053	0.005376			6321.65	0.005376	0.009805	0.010534
	6261.86	0.004207	0.004167	0.005851			6261.86	0.005851	0.010627	0.010842
	6202.52	0.004117	0.004138	0.005885			6202.52	0.005885	0.010601	0.010935
	6143.64	0.004277	0.003853	0.005791			6143.64	0.005791	0.010679	0.010872
	6085.21	0.004013	0.003859	0.005257			6085.21	0.005257	0.010261	0.010472
	6027.23	0.003646	0.003546	0.005085			6027.23	0.005085	0.009403	0.009883
	5969.7	0.003412	0.002966	0.004279			5969.7	0.004279	0.00829	0.008855
	5912.61	0.002876	0.002686	0.004005			5912.61	0.004005	0.007206	0.007944
	5855.96	0.002858	0.002663	0.003403			5855.96	0.003403	0.005743	0.006937
	5799.76	0.002524	0.002406	0.003325			5799.76	0.003325	0.004946	0.006017
	5744	0.002547	0.002469	0.002987			5744	0.002987	0.004403	0.005356
	5688.68	0.002254	0.002373	0.003085			5688.68	0.003085	0.004014	0.004851
	5579.34	0.002233	0.002269	0.002901			5579.34	0.002901	0.003884	0.004524
	5471.72	0.002519	0.002494	0.00291			5471.72	0.00291	0.003911	0.004381
	5365.82	0.002363	0.002351	0.003075			5365.82	0.003075	0.004041	0.00455
	5261.62	0.002437	0.002337	0.003482			5261.62	0.003482	0.004158	0.004683
	5159.1	0.002498	0.002251	0.003713			5159.1	0.003713	0.004683	0.004947
	5058.25	0.002128	0.002464	0.004393			5058.25	0.004393	0.005671	0.005297
	4959.05	0.002393	0.002376	0.005505			4959.05	0.005505	0.007187	0.005614
	4861.49	0.00249	0.002394	0.006749			4861.49	0.006749	0.00893	0.005961
	4765.55	0.002352	0.002649	0.007779			4765.55	0.007779	0.010332	0.006147
	4718.18	0.002474	0.002406	0.008435			4718.18	0.008435	0.010861	0.006303
	4671.22	0.002278	0.002288	0.009062			4671.22	0.009062	0.011089	0.00634
	4624.65	0.002461	0.002451	0.009196			4624.65	0.009196	0.010953	0.006393
	4578.47	0.002517	0.002527	0.009156			4578.47	0.009156	0.010893	0.006312
	4532.69	0.002432	0.002596	0.008954			4532.69	0.008954	0.010421	0.006211
	4487.3	0.002229	0.002789	0.008482			4487.3	0.008482	0.009887	0.005996
	4442.3	0.002387	0.002442	0.008252			4442.3	0.008252	0.008867	0.005461
	4397.69	0.002616	0.002684	0.007707			4397.69	0.007707	0.007682	0.005176
	4353.47	0.002892	0.002646	0.007418			4353.47	0.007418	0.006961	0.004809
	4309.63	0.002503	0.002796	0.006875			4309.63	0.006875	0.006148	0.004534
	4266.17	0.002575	0.002598	0.006148			4266.17	0.006148	0.00516	0.004089
	4223.09	0.002624	0.00273	0.005946			4223.09	0.005946	0.005043	0.003779
	4180.39	0.002571	0.002624	0.005497			4180.39	0.005497	0.004525	0.003662
	4138.07	0.002586	0.002668	0.005477			4138.07	0.005477	0.004388	0.003334
	4096.12	0.002736	0.002655	0.004986			4096.12	0.004986	0.003948	0.003219
	4054.55	0.002476	0.002899	0.005167			4054.55	0.005167	0.003731	0.003201
	4013.34	0.002834	0.002787	0.00483			4013.34	0.00483	0.003728	0.003217
	3972.51	0.002789	0.002867	0.004802			3972.51	0.004802	0.003668	0.003036
	3932.04	0.002641	0.002931	0.004679			3932.04	0.004679	0.003543	0.002799
	3891.93	0.002759	0.003065	0.004673			3891.93	0.004673	0.003403	0.00283
	3852.19	0.002914	0.002861	0.004571			3852.19	0.004571	0.003374	0.002884
	3812.81	0.002895	0.003122	0.004714			3812.81	0.004714	0.003435	0.002866
	3773.79	0.00316	0.003295	0.004514			3773.79	0.004514	0.003454	0.002912
	3735.13	0.003318	0.003394	0.004397			3735.13	0.004397	0.003258	0.002949
	3696.82	0.003496	0.00357	0.004435			3696.82	0.004435	0.003464	0.003046
	3658.86	0.003542	0.003552	0.004288			3658.86	0.004288	0.003285	0.003083
	3621.26	0.003283	0.003727	0.004409			3621.26	0.004409	0.00316	0.003191
	3584.01	0.003659	0.003853	0.004298			3584.01	0.004298	0.0035	0.003353
	3547.1	0.003775	0.004316	0.004163			3547.1	0.004163	0.003631	0.003485
	3510.54	0.004155	0.004522	0.004145			3510.54	0.004145	0.003591	0.003648
	3474.32	0.004552	0.005029	0.004213			3474.32	0.004213	0.003666	0.004072
	3438.45	0.004725	0.005378	0.004312			3438.45	0.004312	0.00391	0.004621
	3402.91	0.005566	0.006086	0.004508			3402.91	0.004508	0.004101	0.005326
	3367.72	0.006248	0.007146	0.004378			3367.72	0.004378	0.004453	0.00613
	3332.86	0.007534	0.008713	0.004824			3332.86	0.004824	0.004689	0.006816
	3298.33	0.00884	0.010518	0.004805			3298.33	0.004805	0.005456	0.007645
	3264.14	0.010703	0.012554	0.005033			3264.14	0.005033	0.006168	0.008515
	3230.28	0.01269	0.014923	0.004946			3230.28	0.004946	0.006723	0.009085
	3196.74	0.015271	0.017113	0.005148			3196.74	0.005148	0.007055	0.009906
	3163.53	0.017239	0.019388	0.005401			3163.53	0.005401	0.007445	0.010436
	3130.65	0.019459	0.021184	0.005434			3130.65	0.005434	0.008058	0.010776
	3098.09	0.022104	0.022977	0.005304			3098.09	0.005304	0.008026	0.011361
	3065.84	0.022941	0.023649	0.005339			3065.84	0.005339	0.008478	0.011526
	3033.92	0.024183	0.023984	0.00556			3033.92	0.00556	0.00865	0.011942
	3002.32	0.024823	0.024343	0.005468			3002.32	0.005468	0.008585	0.011914
	2971.03	0.024068	0.023242	0.005253			2971.03	0.005253	0.00866	0.011681
	2940.05	0.023213	0.021177	0.004933			2940.05	0.004933	0.008251	0.011472
	2909.39	0.021146	0.018905	0.004876			2909.39	0.004876	0.007696	0.010701
	2879.03	0.018525	0.016024	0.004492			2879.03	0.004492	0.007097	0.00993
	2848.98	0.015455	0.01329	0.004419			2848.98	0.004419	0.006205	0.008873
	2819.24	0.012796	0.010295	0.004305			2819.24	0.004305	0.005558	0.00781
	2789.8	0.010014	0.008149	0.00396			2789.8	0.00396	0.004701	0.006986
	2760.66	0.007592	0.006207	0.003787			2760.66	0.003787	0.004186	0.006228
	2731.82	0.005966	0.005146	0.003661			2731.82	0.003661	0.003636	0.005295
	2703.28	0.005109	0.004573	0.003491			2703.28	0.003491	0.003245	0.004603
	2675.03	0.004342	0.003847	0.003544			2675.03	0.003544	0.003027	0.004112
	2647.08	0.003727	0.0036	0.003518			2647.08	0.003518	0.002771	0.003848
	2619.42	0.00362	0.003341	0.003447			2619.42	0.003447	0.002742	0.003692
	2592.05	0.003266	0.003233	0.003314			2592.05	0.003314	0.002613	0.00343
	2564.97	0.003229	0.003116	0.003466			2564.97	0.003466	0.002609	0.003133
	2538.17	0.003068	0.002915	0.003416			2538.17	0.003416	0.002604	0.002812
	2511.66	0.003143	0.002901	0.003428			2511.66	0.003428	0.002515	0.002644
	2485.43	0.002874	0.002795	0.003151			2485.43	0.003151	0.002527	0.00255
	2459.48	0.002727	0.002858	0.003298			2459.48	0.003298	0.002293	0.002404
	2433.81	0.002693	0.002726	0.003243			2433.81	0.003243	0.002435	0.002391
	2408.42	0.002602	0.002859	0.003219			2408.42	0.003219	0.002384	0.002295
	2383.3	0.002618	0.002644	0.003355			2383.3	0.003355	0.002442	0.002303
	2358.45	0.002862	0.002545	0.003325			2358.45	0.003325	0.002356	0.002275
	2333.88	0.00252	0.002612	0.002979			2333.88	0.002979	0.00234	0.002182
	2309.57	0.002508	0.002291	0.003101			2309.57	0.003101	0.00221	0.00228
	2285.53	0.002522	0.002266	0.003269			2285.53	0.003269	0.00223	0.002288
	2261.76	0.002472	0.002449	0.003099			2261.76	0.003099	0.002344	0.002197
	2238.24	0.002469	0.002354	0.003133			2238.24	0.003133	0.002182	0.002211
	2214.99	0.002211	0.002353	0.003069			2214.99	0.003069	0.002288	0.002118
	2192	0.002221	0.00222	0.003014			2192	0.003014	0.002162	0.002165
	2169.27	0.002261	0.002338	0.003023			2169.27	0.003023	0.002106	0.002207
	2146.79	0.002277	0.00224	0.002962			2146.79	0.002962	0.002133	0.00209
	2124.56	0.00227	0.002345	0.002863			2124.56	0.002863	0.002171	0.002046
	2102.59	0.002192	0.002119	0.002975			2102.59	0.002975	0.002066	0.001961
	2080.86	0.002338	0.002123	0.002902			2080.86	0.002902	0.00207	0.00196
	2059.39	0.002253	0.002282	0.00297			2059.39	0.00297	0.001979	0.002069
	2038.16	0.002113	0.0021	0.002946			2038.16	0.002946	0.002176	0.002089
	2017.17	0.002073	0.001979	0.002714			2017.17	0.002714	0.002125	0.002043
	1996.43	0.002208	0.002151	0.002791			1996.43	0.002791	0.00204	0.001969
	1975.92	0.002004	0.002093	0.002797			1975.92	0.002797	0.00192	0.00199
	1955.65	0.00207	0.002094	0.002907			1955.65	0.002907	0.002041	0.002031
	1935.62	0.002053	0.001936	0.002732			1935.62	0.002732	0.002027	0.00198
	1915.83	0.001987	0.001869	0.00279			1915.83	0.00279	0.001972	0.001943
	1896.26	0.002038	0.001893	0.002686			1896.26	0.002686	0.002034	0.001945
	1876.93	0.00215	0.001948	0.002772			1876.93	0.002772	0.002152	0.002034
	1857.83	0.002107	0.002038	0.002778			1857.83	0.002778	0.002006	0.001972
	1838.95	0.001832	0.001959	0.002636			1838.95	0.002636	0.001938	0.001966
	1820.29	0.001745	0.001925	0.002662			1820.29	0.002662	0.002043	0.001941
	1801.86	0.002032	0.001837	0.002651			1801.86	0.002651	0.001962	0.001843
	1783.65	0.001981	0.001718	0.002541			1783.65	0.002541	0.001986	0.001943
	1765.66	0.002187	0.001822	0.002738			1765.66	0.002738	0.001955	0.001919
	1747.89	0.001957	0.001815	0.002563			1747.89	0.002563	0.001821	0.001836
	1730.33	0.001975	0.002109	0.002662			1730.33	0.002662	0.001992	0.001899
	1712.98	0.001967	0.001845	0.002806			1712.98	0.002806	0.001907	0.001905
	1695.85	0.001897	0.00194	0.002871			1695.85	0.002871	0.001849	0.001848
	1678.92	0.001941	0.001852	0.002476			1678.92	0.002476	0.001824	0.001833
	1662.2	0.001875	0.001965	0.002709			1662.2	0.002709	0.001891	0.001797
	1645.69	0.002078	0.001844	0.0025			1645.69	0.0025	0.001903	0.001814
	1629.38	0.002061	0.001963	0.002492			1629.38	0.002492	0.001943	0.001862
	1613.27	0.001938	0.001722	0.002659			1613.27	0.002659	0.001809	0.001852
	1597.36	0.001781	0.001778	0.002619			1597.36	0.002619	0.001867	0.001834
	1581.65	0.001667	0.001412	0.002345			1581.65	0.002345	0.001786	0.00171
	1566.14	0.002	0.002055	0.002619			1566.14	0.002619	0.001889	0.001758
	1550.82	0.001921	0.002046	0.002548			1550.82	0.002548	0.001735	0.001795
	1535.69	0.001954	0.001916	0.00228			1535.69	0.00228	0.001757	0.001846
	1520.75	0.001877	0.001471	0.002524			1520.75	0.002524	0.001726	0.001847
	1506	0.001696	0.001887	0.002498			1506	0.002498	0.001811	0.001726
	1491.43	0.0018	0.001481	0.00241			1491.43	0.00241	0.001842	0.001752
	1477.05	0.001772	0.001708	0.00241			1477.05	0.00241	0.001835	0.001735
	1462.85	0.002071	0.001967	0.002385			1462.85	0.002385	0.001756	0.001672
	1448.84	0.001815	0.001666	0.002482			1448.84	0.002482	0.001711	0.001748
	1435	0.001661	0.00167	0.002429			1435	0.002429	0.001801	0.001783
	1421.33	0.001382	0.001787	0.002432			1421.33	0.002432	0.001797	0.001817
	1407.85	0.001699	0.001652	0.002435			1407.85	0.002435	0.001735	0.001752
	1394.53	0.001792	0.001759	0.002394			1394.53	0.002394	0.00168	0.001747
	1381.39	0.001863	0.001859	0.00242			1381.39	0.00242	0.001692	0.001726
	1368.41	0.001741	0.001602	0.002365			1368.41	0.002365	0.001682	0.001715
	1355.6	0.001645	0.001593	0.002409			1355.6	0.002409	0.001753	0.001804
	1342.96	0.001531	0.001615	0.002376			1342.96	0.002376	0.001782	0.001744
	1330.48	0.001701	0.001607	0.002467			1330.48	0.002467	0.00173	0.001777
	1318.16	0.001708	0.001654	0.00252			1318.16	0.00252	0.001662	0.001704
	1306	0.001567	0.001621	0.002123			1306	0.002123	0.001695	0.001639
	1294	0.001641	0.001694	0.002325			1294	0.002325	0.001614	0.001633
	1282.15	0.001503	0.001655	0.002273			1282.15	0.002273	0.001701	0.001659
	1270.46	0.001697	0.001632	0.002356			1270.46	0.002356	0.00191	0.001675
	1258.92	0.001779	0.001711	0.002218			1258.92	0.002218	0.00177	0.001726
	1247.52	0.001647	0.0017	0.002483			1247.52	0.002483	0.001767	0.001633
	1236.28	0.00164	0.001612	0.002164			1236.28	0.002164	0.001757	0.001623
	1225.18	0.001786	0.001677	0.002237			1225.18	0.002237	0.001746	0.001679
	1214.23	0.002011	0.001722	0.002308			1214.23	0.002308	0.001684	0.001597
	1203.41	0.001682	0.001545	0.002279			1203.41	0.002279	0.001711	0.001695
	1192.74	0.001573	0.001553	0.00213			1192.74	0.00213	0.001818	0.001685
	1182.21	0.001638	0.001613	0.002218			1182.21	0.002218	0.00155	0.00163
	1171.81	0.00168	0.001663	0.002127			1171.81	0.002127	0.001699	0.001691
	1161.54	0.001709	0.001684	0.00226			1161.54	0.00226	0.001576	0.001572
	1151.41	0.00148	0.001669	0.002239			1151.41	0.002239	0.001655	0.001537
	1141.41	0.001678	0.001621	0.002278			1141.41	0.002278	0.001788	0.001514
	1131.54	0.001697	0.001631	0.002254			1131.54	0.002254	0.001695	0.001605
	1121.79	0.001588	0.001635	0.002045			1121.79	0.002045	0.001703	0.001487
	1112.17	0.001775	0.001634	0.002089			1112.17	0.002089	0.001694	0.001521
	1102.67	0.001688	0.001456	0.002133			1102.67	0.002133	0.001643	0.00157
	1093.3	0.001522	0.001649	0.00218			1093.3	0.00218	0.001597	0.00155
	1084.04	0.001385	0.001601	0.002225			1084.04	0.002225	0.00163	0.001604
	1074.89	0.001559	0.001426	0.002044			1074.89	0.002044	0.001773	0.001802
	1065.87	0.00186	0.001545	0.002093			1065.87	0.002093	0.00161	0.001696
	1056.95	0.001714	0.001562	0.001918			1056.95	0.001918	0.001643	0.001601
	1048.15	0.001613	0.001677	0.002047			1048.15	0.002047	0.001614	0.001579
	1039.46	0.001481	0.001583	0.001973			1039.46	0.001973	0.001614	0.001597
	1030.87	0.00141	0.001379	0.002058			1030.87	0.002058	0.001656	0.001577
	1022.39	0.001383	0.00152	0.001964			1022.39	0.001964	0.001586	0.001632
	1014.02	0.001767	0.00156	0.001986			1014.02	0.001986	0.001755	0.001472
	1005.74	0.001469	0.00157	0.002077			1005.74	0.002077	0.001573	0.001569
	997.566	0.001478	0.001475	0.002054			997.566	0.002054	0.001421	0.001496
	989.489	0.00131	0.001664	0.001959			989.489	0.001959	0.001471	0.001527
	981.507	0.001538	0.001533	0.002121			981.507	0.002121	0.001627	0.001565
	973.619	0.001674	0.001433	0.001974			973.619	0.001974	0.001568	0.00158
	965.823	0.001542	0.001421	0.001941			965.823	0.001941	0.001484	0.00169
	958.118	0.0016	0.001535	0.00179			958.118	0.00179	0.001603	0.001565
	950.5	0.001454	0.001805	0.001988			950.5	0.001988	0.001455	0.001503
	942.969	0.001361	0.001601	0.002085			942.969	0.002085	0.001516	0.00156
	935.522	0.001481	0.001393	0.001931			935.522	0.001931	0.001586	0.001616
	928.157	0.001407	0.001409	0.002019			928.157	0.002019	0.001686	0.001562
	920.873	0.001502	0.001574	0.001928			920.873	0.001928	0.001477	0.001595
	913.668	0.001433	0.001568	0.001996			913.668	0.001996	0.001331	0.001449
	906.539	0.001405	0.001392	0.002014			906.539	0.002014	0.001295	0.0015
	899.485	0.001419	0.001451	0.001951			899.485	0.001951	0.001535	0.001476
	892.503	0.001453	0.001467	0.001841			892.503	0.001841	0.001485	0.001612
	885.593	0.001709	0.001383	0.001989			885.593	0.001989	0.001678	0.001599
	878.751	0.001448	0.001436	0.001714			878.751	0.001714	0.001397	0.001555
	871.977	0.00167	0.001351	0.00169			871.977	0.00169	0.001445	0.001569
	865.267	0.001503	0.001527	0.001787			865.267	0.001787	0.001572	0.00153
	858.621	0.001436	0.001659	0.001841			858.621	0.001841	0.001482	0.001474
	852.036	0.001489	0.001441	0.00176			852.036	0.00176	0.001617	0.00158
	845.51	0.001479	0.001334	0.001857			845.51	0.001857	0.001589	0.001625
	839.042	0.001535	0.001336	0.001817			839.042	0.001817	0.00155	0.001629
	832.629	0.001562	0.001349	0.001731			832.629	0.001731	0.001498	0.00144
	826.269	0.001597	0.001401	0.001792			826.269	0.001792	0.001432	0.001438
	819.962	0.001465	0.001485	0.001702			819.962	0.001702	0.001569	0.001506
	813.704	0.001298	0.001488	0.001749			813.704	0.001749	0.001594	0.001534
	807.494	0.001579	0.001334	0.001871			807.494	0.001871	0.001482	0.001505
	801.33	0.001425	0.001334	0.001607			801.33	0.001607	0.001446	0.00157
	795.209	0.001388	0.001478	0.001764			795.209	0.001764	0.001436	0.001541
	789.131	0.001432	0.001456	0.001765			789.131	0.001765	0.001273	0.001529
	783.093	0.001421	0.001429	0.001726			783.093	0.001726	0.001403	0.001539
	777.093	0.001416	0.001465	0.001744			777.093	0.001744	0.001476	0.001483
	771.129	0.001475	0.001442	0.001714			771.129	0.001714	0.001557	0.001489
	765.2	0.001502	0.00126	0.001726			765.2	0.001726	0.001372	0.001511
	759.303	0.001352	0.00122	0.00156			759.303	0.00156	0.001365	0.00147
	753.436	0.001426	0.001337	0.001686			753.436	0.001686	0.001448	0.001444
	747.598	0.001271	0.001336	0.001625			747.598	0.001625	0.001427	0.00148
	741.787	0.001478	0.001401	0.001633			741.787	0.001633	0.001488	0.001539
	736.001	0.001435	0.001416	0.001543			736.001	0.001543	0.001403	0.00151
	730.237	0.001516	0.001416	0.001626			730.237	0.001626	0.00125	0.001496
	724.494	0.001342	0.001351	0.001593			724.494	0.001593	0.001406	0.001459
	718.77	0.001319	0.001399	0.00162			718.77	0.00162	0.001314	0.001371
	713.063	0.001454	0.00133	0.001557			713.063	0.001557	0.001272	0.001421
	707.372	0.001317	0.001401	0.001691			707.372	0.001691	0.001316	0.001473
	701.693	0.001245	0.001191	0.001698			701.693	0.001698	0.001298	0.001494
	696.026	0.001418	0.001313	0.00162			696.026	0.00162	0.00142	0.001495
	690.368	0.001222	0.001221	0.001567			690.368	0.001567	0.001274	0.001363
	684.718	0.001202	0.001345	0.001499			684.718	0.001499	0.001243	0.001485
	679.073	0.001425	0.00125	0.001545			679.073	0.001545	0.001262	0.001534
	673.432	0.001339	0.001256	0.00158			673.432	0.00158	0.001285	0.001423
	667.792	0.001418	0.00119	0.001391			667.792	0.001391	0.001291	0.001416
	662.152	0.001354	0.00146	0.001607			662.152	0.001607	0.001251	0.001433
	656.51	0.00131	0.001264	0.001442			656.51	0.001442	0.001251	0.001444
	650.864	0.001313	0.001287	0.001506			650.864	0.001506	0.001363	0.001547
	645.211	0.001289	0.00124	0.001568			645.211	0.001568	0.001332	0.001473
	639.551	0.001323	0.001435	0.001633			639.551	0.001633	0.001246	0.001474
	633.881	0.001272	0.001399	0.001436			633.881	0.001436	0.001291	0.001474
	628.199	0.00159	0.001288	0.001454			628.199	0.001454	0.001327	0.001495
	622.504	0.001221	0.001172	0.001486			622.504	0.001486	0.001177	0.001489
	616.792	0.001208	0.001348	0.001447			616.792	0.001447	0.001317	0.001462
	611.064	0.001389	0.001324	0.001451			611.064	0.001451	0.001239	0.001406
	605.315	0.001251	0.001339	0.001478			605.315	0.001478	0.00128	0.001514
	599.546	0.001307	0.001509	0.001406			599.546	0.001406	0.001306	0.001396
	593.753	0.00128	0.001383	0.001446			593.753	0.001446	0.001292	0.001465
	587.934	0.001522	0.001282	0.001443			587.934	0.001443	0.001218	0.001449
	582.089	0.001396	0.001215	0.001369			582.089	0.001369	0.001172	0.00135
	576.215	0.001229	0.001384	0.001388			576.215	0.001388	0.001209	0.001363
	570.309	0.001314	0.001216	0.00133			570.309	0.00133	0.001284	0.001259
	564.371	0.001328	0.001384	0.001414			564.371	0.001414	0.001208	0.001354
	558.397	0.001461	0.001228	0.001323			558.397	0.001323	0.001119	0.001409
	552.387	0.001355	0.001251	0.001424			552.387	0.001424	0.001182	0.001382
	546.338	0.001211	0.00124	0.001389			546.338	0.001389	0.001276	0.001318
	540.249	0.001167	0.001337	0.001473			540.249	0.001473	0.001212	0.001343
	534.117	0.001223	0.001129	0.001279			534.117	0.001279	0.001191	0.001454
	527.941	0.001241	0.001226	0.001483			527.941	0.001483	0.001122	0.001338
	521.718	0.001128	0.001273	0.001449			521.718	0.001449	0.001175	0.001282
	515.447	0.00134	0.001176	0.001601			515.447	0.001601	0.001213	0.001329
	509.125	0.001069	0.001234	0.001447			509.125	0.001447	0.001249	0.001286
	502.752	0.001253	0.001189	0.00143			502.752	0.00143	0.001228	0.001336
	496.324	0.001317	0.001258	0.001544			496.324	0.001544	0.001167	0.001187
	489.841	0.001146	0.001138	0.001396			489.841	0.001396	0.001219	0.001324
	483.299	0.001137	0.001269	0.001355			483.299	0.001355	0.001176	0.001214
	476.698	0.001175	0.001095	0.001412			476.698	0.001412	0.001128	0.001201
	470.034	0.001057	0.00116	0.001387			470.034	0.001387	0.001154	0.001269
	463.308	0.00122	0.001167	0.001473			463.308	0.001473	0.00124	0.001294
	456.515	0.001244	0.001318	0.001288			456.515	0.001288	0.00122	0.001402
	449.655	0.001366	0.001092	0.001406			449.655	0.001406	0.001179	0.001232
	442.726	0.001138	0.001136	0.001449			442.726	0.001449	0.00109	0.001331
	435.725	0.001343	0.001081	0.001384			435.725	0.001384	0.001118	0.001224
	428.651	0.001322	0.001202	0.001534			428.651	0.001534	0.001056	0.001171
	421.501	0.001147	0.001048	0.001524			421.501	0.001524	0.001172	0.00128
	414.275	0.001193	0.001168	0.001521			414.275	0.001521	0.001095	0.001256
	406.969	0.001178	0.001209	0.001306			406.969	0.001306	0.001109	0.001235
	399.583	0.001069	0.001166	0.001272			399.583	0.001272	0.001135	0.001171
	392.113	0.001227	0.00115	0.001368			392.113	0.001368	0.001088	0.001189
	384.559	0.001288	0.001125	0.00139			384.559	0.00139	0.001135	0.001142
	376.918	0.001218	0.001195	0.001397			376.918	0.001397	0.001114	0.001285
	369.188	0.00112	0.001271	0.001358			369.188	0.001358	0.001153	0.001202
	361.368	0.001269	0.0013	0.001367			361.368	0.001367	0.00117	0.001118
	353.454	0.001278	0.001207	0.001364			353.454	0.001364	0.001136	0.001249
	345.447	0.001023	0.001279	0.001274			345.447	0.001274	0.001085	0.00109
	337.344	0.00105	0.001061	0.001378			337.344	0.001378	0.001125	0.001057
	329.141	0.001108	0.001081	0.001379			329.141	0.001379	0.000996	0.001127
	320.839	0.001312	0.001138	0.001392			320.839	0.001392	0.001128	0.00116
	312.435	0.001278	0.001189	0.001287			312.435	0.001287	0.001009	0.001089
	303.926	0.001045	0.001099	0.001349			303.926	0.001349	0.000942	0.001042
	295.312	0.001111	0.001272	0.001329			295.312	0.001329	0.001123	0.001034
	286.59	0.001018	0.001076	0.001251			286.59	0.001251	0.000987	0.001075
	277.757	0.001077	0.001215	0.001361			277.757	0.001361	0.001055	0.001234
	268.814	0.000928	0.001114	0.00127			268.814	0.00127	0.001006	0.001241
	259.756	0.001143	0.001315	0.001269			259.756	0.001269	0.001155	0.001129
	250.583	0.000993	0.001065	0.00126			250.583	0.00126	0.001096	0.001153
	241.292	0.001059	0.00101	0.00117			241.292	0.00117	0.001065	0.00107
	231.882	0.001067	0.001221	0.001217			231.882	0.001217	0.000976	0.001024
	222.351	0.001269	0.001122	0.001108			222.351	0.001108	0.000974	0.001041
	212.696	0.000935	0.001237	0.001241			212.696	0.001241	0.001043	0.00117
	202.916	0.00105	0.001178	0.001257			202.916	0.001257	0.00102	0.001103
	193.009	0.0009	0.001089	0.001272			193.009	0.001272	0.001001	0.001143
	182.973	0.000961	0.000994	0.001235			182.973	0.001235	0.00096	0.001039
	172.806	0.0012	0.000967	0.001162			172.806	0.001162	0.000996	0.001049
	162.506	0.001089	0.001182	0.00109			162.506	0.00109	0.000976	0.001053
	152.071	0.001123	0.001053	0.001172			152.071	0.001172	0.001089	0.001166
	141.499	0.001129	0.001052	0.001133			141.499	0.001133	0.000906	0.001058
	130.789	0.001217	0.001079	0.001135			130.789	0.001135	0.000967	0.00104
	119.938	0.00105	0.00117	0.001055			119.938	0.001055	0.000799	0.001012
	108.945	0.001056	0.000929	0.001155			108.945	0.001155	0.001058	0.001009
	97.8074	0.0013	0.001055	0.001024			97.8074	0.001024	0.00099	0.001107
	86.5233	0.001138	0.000989	0.001121			86.5233	0.001121	0.001065	0.001026
	75.091	0.001086	0.001029	0.001074			75.091	0.001074	0.001043	0.00102
	63.5085	0.000991	0.000919	0.001118			63.5085	0.001118	0.001022	0.000948
	51.7738	0.000717	0.000962	0.001116			51.7738	0.001116	0.000895	0.000985
	39.8852	0.001087	0.001057	0.001035			39.8852	0.001035	0.000903	0.000965
	27.8405	0.000929	0.00113	0.00105			27.8405	0.00105	0.000989	0.000975
	15.638	0.001158	0.000996	0.0009			15.638	0.0009	0.000875	0.00102
									0.000901
									0.00086

## Sheet: Fig. 5I
Relaxed plasmid
left panel	bp	Control	Gfp	HipH-Gfp		right panel	bp	HipH-Gfp	HipH-Gfp+C-di-Gmp+	HipH-Gfp+C-di-Gmp++
	7705.93	0.002063	0.002314	0.001707			7705.93	0.001707	0.001887	0.002189
	7638.26	0.002214	0.002092	0.001862			7638.26	0.001862	0.001839	0.002377
	7571.06	0.002197	0.002358	0.001885			7571.06	0.001885	0.001919	0.002268
	7504.31	0.002245	0.002404	0.001647			7504.31	0.001647	0.00197	0.002011
	7438.04	0.002077	0.002231	0.001758			7438.04	0.001758	0.002354	0.002545
	7372.22	0.002115	0.002357	0.001952			7372.22	0.001952	0.002339	0.002516
	7306.86	0.002382	0.00257	0.002164			7306.86	0.002164	0.002173	0.002605
	7241.96	0.002511	0.002463	0.002063			7241.96	0.002063	0.00237	0.002664
	7177.51	0.002587	0.002495	0.001838			7177.51	0.001838	0.002458	0.002496
	7113.52	0.0026	0.002744	0.001977			7113.52	0.001977	0.002369	0.002753
	7049.98	0.002627	0.002627	0.002196			7049.98	0.002196	0.002697	0.002813
	6986.89	0.002527	0.00294	0.002141			6986.89	0.002141	0.002596	0.002892
	6924.25	0.002678	0.003124	0.002193			6924.25	0.002193	0.002253	0.002704
	6862.05	0.002872	0.003149	0.002227			6862.05	0.002227	0.00258	0.002852
	6800.3	0.003092	0.003176	0.001968			6800.3	0.001968	0.002564	0.00313
	6738.99	0.003281	0.003384	0.001993			6738.99	0.001993	0.002719	0.00307
	6678.12	0.003205	0.003759	0.002155			6678.12	0.002155	0.002767	0.003387
	6617.7	0.003383	0.003986	0.002301			6617.7	0.002301	0.002816	0.003457
	6557.71	0.003697	0.004074	0.002272			6557.71	0.002272	0.003095	0.003486
	6498.16	0.003755	0.004379	0.002294			6498.16	0.002294	0.00332	0.00414
	6439.03	0.004347	0.004825	0.002439			6439.03	0.002439	0.003218	0.004081
	6380.35	0.00488	0.005309	0.002337			6380.35	0.002337	0.003417	0.004051
	6322.09	0.005457	0.00587	0.002707			6322.09	0.002707	0.00388	0.004526
	6264.27	0.006213	0.006783	0.00251			6264.27	0.00251	0.003883	0.00522
	6206.87	0.006832	0.007827	0.002559			6206.87	0.002559	0.0045	0.005933
	6149.89	0.008079	0.009366	0.002884			6149.89	0.002884	0.004906	0.006507
	6093.34	0.009212	0.010897	0.002601			6093.34	0.002601	0.006034	0.007854
	6037.22	0.010568	0.012652	0.003231			6037.22	0.003231	0.007016	0.009429
	5981.51	0.012523	0.014415	0.003474			5981.51	0.003474	0.008376	0.010994
	5926.22	0.013933	0.016468	0.00427			5926.22	0.00427	0.009975	0.012806
	5871.34	0.015938	0.018445	0.00474			5871.34	0.00474	0.011731	0.015124
	5816.89	0.017925	0.020061	0.005477			5816.89	0.005477	0.013658	0.016768
	5762.84	0.019844	0.02215	0.006041			5762.84	0.006041	0.015096	0.019204
	5709.21	0.021635	0.024473	0.007243			5709.21	0.007243	0.017028	0.021086
	5655.98	0.023155	0.028928	0.007943			5655.98	0.007943	0.018401	0.022661
	5603.17	0.035803	0.037032	0.008898			5603.17	0.008898	0.019499	0.024315
	5550.76	0.035803	0.037032	0.009078			5550.76	0.009078	0.019972	0.024741
	5498.75	0.035803	0.037032	0.009284			5498.75	0.009284	0.01991	0.025028
	5447.15	0.035803	0.037032	0.009059			5447.15	0.009059	0.019853	0.024196
	5395.95	0.023487	0.023009	0.008517			5395.95	0.008517	0.01812	0.022433
	5345.14	0.020694	0.018737	0.007955			5345.14	0.007955	0.015301	0.019987
	5294.74	0.016775	0.014818	0.006765			5294.74	0.006765	0.012314	0.015163
	5244.73	0.013366	0.010702	0.005757			5244.73	0.005757	0.009189	0.011826
	5195.11	0.009807	0.008352	0.004662			5195.11	0.004662	0.007524	0.008874
	5145.89	0.00765	0.006698	0.003866			5145.89	0.003866	0.005918	0.006923
	5097.06	0.00628	0.005405	0.003491			5097.06	0.003491	0.005355	0.006081
	5048.61	0.005058	0.004843	0.003896			5048.61	0.003896	0.005011	0.005527
	5000.55	0.004588	0.004479	0.004047			5000.55	0.004047	0.005649	0.0052
	4952.88	0.004217	0.004005	0.00461			4952.88	0.00461	0.006021	0.004863
	4905.59	0.004199	0.004123	0.005045			4905.59	0.005045	0.006933	0.0052
	4858.68	0.004085	0.004188	0.005697			4858.68	0.005697	0.00778	0.005794
	4812.15	0.003998	0.00411	0.006193			4812.15	0.006193	0.008425	0.00619
	4766	0.004187	0.004471	0.007284			4766	0.007284	0.009553	0.006883
	4720.22	0.004306	0.004516	0.007743			4720.22	0.007743	0.010444	0.006943
	4674.82	0.004403	0.004614	0.008408			4674.82	0.008408	0.011155	0.008042
	4629.79	0.004774	0.00463	0.009022			4629.79	0.009022	0.011831	0.008696
	4585.14	0.004589	0.004953	0.009372			4585.14	0.009372	0.012385	0.009112
	4540.85	0.004607	0.004982	0.00978			4540.85	0.00978	0.012877	0.009092
	4496.93	0.004606	0.004968	0.009785			4496.93	0.009785	0.012616	0.008993
	4453.37	0.004337	0.004585	0.009258			4453.37	0.009258	0.012149	0.009468
	4410.18	0.004027	0.003917	0.009221			4410.18	0.009221	0.011155	0.008736
	4367.35	0.003723	0.003402	0.008411			4367.35	0.008411	0.00968	0.007626
	4324.88	0.003523	0.003044	0.008173			4324.88	0.008173	0.008591	0.006725
	4282.77	0.002975	0.002706	0.007295			4282.77	0.007295	0.007716	0.005636
	4241.02	0.002632	0.002743	0.007031			4241.02	0.007031	0.006185	0.004615
	4199.62	0.002607	0.002399	0.006379			4199.62	0.006379	0.005835	0.004199
	4158.58	0.002507	0.00236	0.005984			4158.58	0.005984	0.004654	0.003437
	4117.88	0.002384	0.002203	0.005896			4117.88	0.005896	0.004655	0.003447
	4077.54	0.002417	0.002213	0.00565			4077.54	0.00565	0.004178	0.002912
	4037.55	0.002342	0.001992	0.005073			4037.55	0.005073	0.00409	0.002753
	3997.9	0.002257	0.002134	0.005185			3997.9	0.005185	0.003541	0.003011
	3958.59	0.002131	0.002012	0.004915			3958.59	0.004915	0.00337	0.00308
	3919.63	0.00202	0.00212	0.004776			3919.63	0.004776	0.003386	0.002644
	3881.01	0.002081	0.002076	0.004639			3881.01	0.004639	0.003183	0.002615
	3842.73	0.001986	0.001714	0.004607			3842.73	0.004607	0.003117	0.002436
	3804.78	0.002057	0.002049	0.00435			3804.78	0.00435	0.003252	0.002407
	3767.17	0.001923	0.001969	0.004326			3767.17	0.004326	0.003112	0.002209
	3729.9	0.001984	0.002018	0.004246			3729.9	0.004246	0.003061	0.002357
	3692.96	0.001959	0.002019	0.003978			3692.96	0.003978	0.002969	0.002179
	3656.35	0.001976	0.00198	0.00412			3656.35	0.00412	0.00296	0.002506
	3620.06	0.00209	0.001866	0.004145			3620.06	0.004145	0.002734	0.002595
	3584.11	0.002089	0.001979	0.003908			3584.11	0.003908	0.00276	0.002209
	3548.47	0.001836	0.001899	0.004103			3548.47	0.004103	0.002429	0.002209
	3513.17	0.001821	0.001996	0.0039			3513.17	0.0039	0.002785	0.002189
	3478.18	0.002049	0.001804	0.003903			3478.18	0.003903	0.002509	0.002179
	3443.51	0.00192	0.001747	0.003823			3443.51	0.003823	0.002697	0.002387
	3409.17	0.001938	0.001771	0.003829			3409.17	0.003829	0.00257	0.001921
	3375.14	0.001862	0.001845	0.00398			3375.14	0.00398	0.002916	0.002248
	3341.42	0.001727	0.001776	0.003684			3341.42	0.003684	0.002543	0.002327
	3308.01	0.001783	0.001785	0.003828			3308.01	0.003828	0.002603	0.002219
	3274.92	0.001869	0.001739	0.003534			3274.92	0.003534	0.002333	0.001961
	3242.14	0.001815	0.001753	0.003776			3242.14	0.003776	0.002491	0.001832
	3209.66	0.00185	0.001709	0.003809			3209.66	0.003809	0.002544	0.00208
	3177.49	0.001794	0.001772	0.0038			3177.49	0.0038	0.00227	0.001971
	3145.62	0.001792	0.001844	0.00363			3145.62	0.00363	0.002511	0.001991
	3114.06	0.001675	0.001752	0.003541			3114.06	0.003541	0.002244	0.001912
	3082.8	0.001731	0.001591	0.003474			3082.8	0.003474	0.002415	0.001684
	3051.83	0.001643	0.001726	0.003553			3051.83	0.003553	0.002268	0.001793
	3021.16	0.001678	0.001677	0.003811			3021.16	0.003811	0.001971	0.001674
	2990.79	0.001637	0.001605	0.003515			2990.79	0.003515	0.00216	0.00205
	2960.71	0.001797	0.001592	0.003192			2960.71	0.003192	0.002268	0.001832
	2930.92	0.001772	0.001682	0.003404			2930.92	0.003404	0.002295	0.001921
	2901.43	0.001724	0.001663	0.003411			2901.43	0.003411	0.002229	0.001793
	2872.22	0.001653	0.001697	0.00347			2872.22	0.00347	0.002242	0.001595
	2843.29	0.001671	0.001655	0.00317			2843.29	0.00317	0.002172	0.001803
	2814.66	0.001695	0.00154	0.003015			2814.66	0.003015	0.002287	0.00202
	2786.3	0.001616	0.001748	0.003263			2786.3	0.003263	0.002196	0.001882
	2758.23	0.001688	0.001551	0.003147			2758.23	0.003147	0.001997	0.001604
	2730.43	0.001666	0.001687	0.003444			2730.43	0.003444	0.00226	0.001644
	2702.91	0.001714	0.001664	0.00339			2702.91	0.00339	0.001907	0.001713
	2675.68	0.001696	0.001647	0.003224			2675.68	0.003224	0.002208	0.001763
	2648.71	0.001438	0.00158	0.003049			2648.71	0.003049	0.002014	0.001931
	2622.01	0.001674	0.001592	0.002917			2622.01	0.002917	0.00192	0.002318
	2595.59	0.001623	0.001658	0.002961			2595.59	0.002961	0.001995	0.001842
	2569.43	0.001709	0.001438	0.003036			2569.43	0.003036	0.002113	0.001803
	2543.55	0.00165	0.001507	0.003162			2543.55	0.003162	0.001803	0.001773
	2517.92	0.001545	0.001479	0.003051			2517.92	0.003051	0.002037	0.001832
	2492.56	0.001561	0.001513	0.00297			2492.56	0.00297	0.002041	0.001812
	2467.47	0.001731	0.001611	0.003023			2467.47	0.003023	0.001841	0.001624
	2442.63	0.001701	0.001523	0.003112			2442.63	0.003112	0.00183	0.001515
	2418.05	0.001583	0.001452	0.00307			2418.05	0.00307	0.001908	0.001624
	2393.73	0.001663	0.001514	0.002946			2393.73	0.002946	0.002022	0.001644
	2369.66	0.001665	0.001387	0.002959			2369.66	0.002959	0.001892	0.001604
	2345.84	0.001551	0.00148	0.002933			2345.84	0.002933	0.001846	0.001565
	2322.28	0.00162	0.001464	0.002821			2322.28	0.002821	0.001894	0.001624
	2298.97	0.001691	0.001677	0.002736			2298.97	0.002736	0.001823	0.001436
	2275.9	0.001709	0.001602	0.003058			2275.9	0.003058	0.001829	0.001733
	2253.08	0.001663	0.001373	0.002942			2253.08	0.002942	0.001889	0.001357
	2230.5	0.00152	0.001254	0.002822			2230.5	0.002822	0.001887	0.001545
	2208.17	0.001597	0.001626	0.002904			2208.17	0.002904	0.001926	0.001545
	2186.07	0.001581	0.001627	0.003004			2186.07	0.003004	0.001746	0.001426
	2164.22	0.001573	0.001669	0.002687			2164.22	0.002687	0.001763	0.001753
	2142.6	0.001549	0.001539	0.002786			2142.6	0.002786	0.001747	0.001535
	2121.22	0.001554	0.001483	0.002762			2121.22	0.002762	0.001699	0.001664
	2100.07	0.001543	0.001209	0.002879			2100.07	0.002879	0.001824	0.001882
	2079.16	0.001585	0.001533	0.00266			2079.16	0.00266	0.00185	0.001575
	2058.47	0.001553	0.001453	0.002801			2058.47	0.002801	0.001645	0.001604
	2038.01	0.001626	0.001327	0.002915			2038.01	0.002915	0.001708	0.001555
	2017.78	0.001658	0.001516	0.002675			2017.78	0.002675	0.001611	0.001565
	1997.78	0.001602	0.001426	0.002706			1997.78	0.002706	0.001572	0.001387
	1977.99	0.0016	0.001486	0.002562			1977.99	0.002562	0.001841	0.001654
	1958.43	0.001668	0.001438	0.002596			1958.43	0.002596	0.001613	0.001555
	1939.09	0.001565	0.001447	0.002729			1939.09	0.002729	0.001561	0.001496
	1919.96	0.001483	0.001527	0.002795			1919.96	0.002795	0.001673	0.001644
	1901.06	0.001555	0.001275	0.002639			1901.06	0.002639	0.001659	0.001496
	1882.36	0.001567	0.001505	0.002651			1882.36	0.002651	0.00169	0.001654
	1863.88	0.001496	0.001285	0.002553			1863.88	0.002553	0.001816	0.001723
	1845.61	0.001439	0.001237	0.002575			1845.61	0.002575	0.001972	0.001842
	1827.55	0.001447	0.00155	0.002586			1827.55	0.002586	0.001693	0.001248
	1809.69	0.001496	0.001403	0.002621			1809.69	0.002621	0.001544	0.001515
	1792.04	0.001473	0.00142	0.002586			1792.04	0.002586	0.001711	0.001614
	1774.6	0.001581	0.00147	0.002438			1774.6	0.002438	0.001907	0.001565
	1757.36	0.00166	0.001394	0.002478			1757.36	0.002478	0.001642	0.001822
	1740.31	0.001485	0.001321	0.002731			1740.31	0.002731	0.001658	0.001476
	1723.47	0.001486	0.001465	0.002685			1723.47	0.002685	0.001328	0.001515
	1706.82	0.001515	0.001411	0.002417			1706.82	0.002417	0.001607	0.001743
	1690.37	0.001408	0.001427	0.002534			1690.37	0.002534	0.001881	0.001545
	1674.11	0.001616	0.001417	0.002543			1674.11	0.002543	0.001678	0.001486
	1658.04	0.001455	0.001465	0.002519			1658.04	0.002519	0.001799	0.001426
	1642.16	0.001334	0.001273	0.002429			1642.16	0.002429	0.001597	0.001585
	1626.47	0.001444	0.001378	0.002389			1626.47	0.002389	0.001546	0.001278
	1610.96	0.001414	0.001386	0.002604			1610.96	0.002604	0.001484	0.001278
	1595.64	0.001535	0.001431	0.002454			1595.64	0.002454	0.001605	0.001575
	1580.5	0.00132	0.001305	0.00225			1580.5	0.00225	0.001746	0.001595
	1565.55	0.001424	0.001342	0.002431			1565.55	0.002431	0.001602	0.001832
	1550.77	0.00136	0.001383	0.002379			1550.77	0.002379	0.001569	0.001367
	1536.17	0.001284	0.001308	0.002491			1536.17	0.002491	0.00158	0.001169
	1521.74	0.001659	0.001555	0.002469			1521.74	0.002469	0.001478	0.001654
	1507.49	0.001685	0.001493	0.002386			1507.49	0.002386	0.001545	0.001812
	1493.41	0.001573	0.001441	0.002414			1493.41	0.002414	0.001603	0.001575
	1479.5	0.001416	0.001219	0.002292			1479.5	0.002292	0.001705	0.001387
	1465.76	0.001556	0.001432	0.00233			1465.76	0.00233	0.001638	0.001347
	1452.19	0.001311	0.00141	0.002346			1452.19	0.002346	0.001586	0.001258
	1438.78	0.001572	0.001438	0.002429			1438.78	0.002429	0.001491	0.001406
	1425.53	0.001678	0.00133	0.002293			1425.53	0.002293	0.001348	0.001565
	1412.45	0.001448	0.001408	0.002261			1412.45	0.002261	0.001645	0.001505
	1399.52	0.00137	0.001275	0.002319			1399.52	0.002319	0.00157	0.001664
	1386.76	0.001369	0.001352	0.002419			1386.76	0.002419	0.001424	0.001486
	1374.15	0.001518	0.001328	0.002168			1374.15	0.002168	0.00156	0.001456
	1361.69	0.001281	0.00138	0.002308			1361.69	0.002308	0.001419	0.001278
	1349.39	0.001474	0.001295	0.002225			1349.39	0.002225	0.00148	0.001416
	1337.23	0.001403	0.001388	0.002265			1337.23	0.002265	0.001704	0.001496
	1325.23	0.001354	0.001303	0.002253			1325.23	0.002253	0.001532	0.001575
	1313.38	0.001547	0.001378	0.002359			1313.38	0.002359	0.001604	0.001416
	1301.67	0.001469	0.001351	0.002278			1301.67	0.002278	0.001395	0.001505
	1290.1	0.001383	0.001408	0.002137			1290.1	0.002137	0.001556	0.001396
	1278.68	0.001426	0.001373	0.002207			1278.68	0.002207	0.001458	0.001367
	1267.39	0.001331	0.001296	0.002089			1267.39	0.002089	0.00153	0.001416
	1256.25	0.001401	0.001245	0.002225			1256.25	0.002225	0.001688	0.001604
	1245.24	0.001388	0.001324	0.002352			1245.24	0.002352	0.001362	0.001763
	1234.37	0.001293	0.001317	0.002297			1234.37	0.002297	0.001362	0.001555
	1223.63	0.001441	0.001259	0.00214			1223.63	0.00214	0.001463	0.001416
	1213.02	0.001496	0.001198	0.002188			1213.02	0.002188	0.001528	0.001258
	1202.54	0.001402	0.001362	0.002146			1202.54	0.002146	0.001606	0.001387
	1192.19	0.001388	0.001357	0.002114			1192.19	0.002114	0.001432	0.001297
	1181.96	0.001273	0.001188	0.002234			1181.96	0.002234	0.001505	0.001357
	1171.87	0.001482	0.001251	0.00214			1171.87	0.00214	0.001328	0.001327
	1161.89	0.001328	0.001437	0.00206			1161.89	0.00206	0.001429	0.001496
	1152.03	0.001587	0.001302	0.002185			1152.03	0.002185	0.001526	0.001456
	1142.3	0.001348	0.001289	0.002109			1142.3	0.002109	0.001378	0.001198
	1132.68	0.001189	0.001315	0.00209			1132.68	0.00209	0.00144	0.001456
	1123.17	0.001232	0.00141	0.002212			1123.17	0.002212	0.001325	0.001446
	1113.79	0.001305	0.001312	0.002036			1113.79	0.002036	0.001504	0.001297
	1104.51	0.001357	0.001373	0.002034			1104.51	0.002034	0.001392	0.001327
	1095.34	0.001393	0.001357	0.002057			1095.34	0.002057	0.001487	0.001496
	1086.28	0.001223	0.001098	0.002095			1086.28	0.002095	0.001502	0.001505
	1077.33	0.001462	0.001312	0.002029			1077.33	0.002029	0.00154	0.001476
	1068.49	0.001361	0.001211	0.002074			1068.49	0.002074	0.001501	0.001426
	1059.74	0.001864	0.001248	0.001902			1059.74	0.001902	0.00142	0.001604
	1051.1	0.00257	0.001501	0.001892			1051.1	0.001892	0.001575	0.001297
	1042.56	0.00323	0.001354	0.001924			1042.56	0.001924	0.001455	0.001664
	1034.12	0.002361	0.001269	0.001934			1034.12	0.001934	0.001564	0.001476
	1025.77	0.001516	0.001255	0.002109			1025.77	0.002109	0.001336	0.001268
	1017.52	0.001519	0.001246	0.002018			1017.52	0.002018	0.001515	0.001268
	1009.36	0.002049	0.001279	0.002049			1009.36	0.002049	0.001355	0.001278
	1001.29	0.002077	0.001299	0.001819			1001.29	0.001819	0.001368	0.001614
	993.314	0.002431	0.00136	0.001909			993.314	0.001909	0.001155	0.001258
	985.423	0.00232	0.001077	0.001873			985.423	0.001873	0.001543	0.001545
	977.617	0.001992	0.001137	0.001965			977.617	0.001965	0.001369	0.001585
	969.896	0.001856	0.001456	0.001788			969.896	0.001788	0.001211	0.001238
	962.257	0.001922	0.001369	0.001973			962.257	0.001973	0.001393	0.001268
	954.698	0.002009	0.001442	0.001766			954.698	0.001766	0.001219	0.001367
	947.219	0.002026	0.001318	0.001835			947.219	0.001835	0.001334	0.001614
	939.816	0.001864	0.001294	0.001884			939.816	0.001884	0.001527	0.001565
	932.489	0.001673	0.001252	0.001861			932.489	0.001861	0.001456	0.001535
	925.235	0.001674	0.001152	0.001865			925.235	0.001865	0.001423	0.001545
	918.052	0.00143	0.001254	0.001824			918.052	0.001824	0.00114	0.001238
	910.94	0.001439	0.001295	0.001885			910.94	0.001885	0.00119	0.00106
	903.896	0.001242	0.00132	0.001752			903.896	0.001752	0.001301	0.001664
	896.918	0.001337	0.001411	0.001866			896.918	0.001866	0.001317	0.00104
	890.005	0.001397	0.001344	0.001904			890.005	0.001904	0.001373	0.001179
	883.155	0.001367	0.001297	0.001943			883.155	0.001943	0.001367	0.001139
	876.366	0.001329	0.001302	0.001649			876.366	0.001649	0.001221	0.001317
	869.637	0.00125	0.001283	0.001769			869.637	0.001769	0.001169	0.001297
	862.965	0.001366	0.001426	0.001735			862.965	0.001735	0.001219	0.001159
	856.349	0.001275	0.001239	0.001612			856.349	0.001612	0.001244	0.001496
	849.787	0.001383	0.001209	0.001679			849.787	0.001679	0.001339	0.001327
	843.278	0.0012	0.001181	0.001688			843.278	0.001688	0.001344	0.001416
	836.819	0.001458	0.001191	0.001728			836.819	0.001728	0.001082	0.001387
	830.409	0.001519	0.001265	0.001607			830.409	0.001607	0.001298	0.001198
	824.046	0.001412	0.001289	0.001819			824.046	0.001819	0.001386	0.001585
	817.728	0.001456	0.001156	0.001703			817.728	0.001703	0.001314	0.001347
	811.454	0.001351	0.001189	0.001609			811.454	0.001609	0.001275	0.001129
	805.222	0.00131	0.001418	0.001667			805.222	0.001667	0.00115	0.001278
	799.03	0.00148	0.001175	0.001629			799.03	0.001629	0.001055	0.001198
	792.876	0.001335	0.001281	0.001684			792.876	0.001684	0.001162	0.001347
	786.759	0.001414	0.001341	0.001586			786.759	0.001586	0.001403	0.001367
	780.676	0.001343	0.001194	0.001693			780.676	0.001693	0.001383	0.001456
	774.626	0.001239	0.001226	0.00168			774.626	0.00168	0.001271	0.001228
	768.608	0.001174	0.001179	0.001496			768.608	0.001496	0.001177	0.001387
	762.619	0.001396	0.001317	0.001655			762.619	0.001655	0.001008	0.001555
	756.658	0.001224	0.001266	0.001619			756.658	0.001619	0.0012	0.001337
	750.723	0.001341	0.001245	0.001492			750.723	0.001492	0.001069	0.001357
	744.812	0.001281	0.001242	0.001602			744.812	0.001602	0.001175	0.001307
	738.923	0.001266	0.001186	0.001768			738.923	0.001768	0.001011	0.001268
	733.056	0.001258	0.001229	0.001501			733.056	0.001501	0.001342	0.001119
	727.207	0.001335	0.001268	0.001554			727.207	0.001554	0.000889	0.001377
	721.375	0.00124	0.001217	0.001563			721.375	0.001563	0.000962	0.001387
	715.559	0.001269	0.001239	0.00172			715.559	0.00172	0.001106	0.001089
	709.756	0.001178	0.001165	0.001648			709.756	0.001648	0.001393	0.001198
	703.965	0.001184	0.001197	0.001524			703.965	0.001524	0.001114	0.00108
	698.184	0.001219	0.001228	0.001518			698.184	0.001518	0.001099	0.001
	692.412	0.001426	0.001336	0.001454			692.412	0.001454	0.001064	0.001426
	686.646	0.001333	0.001252	0.001485			686.646	0.001485	0.001202	0.001327
	680.885	0.001308	0.001281	0.001529			680.885	0.001529	0.00116	0.001337
	675.128	0.001222	0.001158	0.001661			675.128	0.001661	0.001056	0.001307
	669.371	0.001163	0.001032	0.001628			669.371	0.001628	0.00088	0.001258
	663.614	0.001339	0.001098	0.001498			663.614	0.001498	0.001086	0.001377
	657.855	0.001205	0.001031	0.001466			657.855	0.001466	0.001212	0.001179
	652.092	0.001229	0.001195	0.001546			652.092	0.001546	0.000926	0.001288
	646.323	0.001227	0.001117	0.001693			646.323	0.001693	0.001293	0.001297
	640.547	0.001174	0.001206	0.001411			640.547	0.001411	0.001035	0.000911
	634.762	0.001164	0.001354	0.001346			634.762	0.001346	0.001177	0.001218
	628.965	0.001264	0.000995	0.001379			628.965	0.001379	0.00114	0.001535
	623.156	0.001215	0.001169	0.001437			623.156	0.001437	0.00126	0.001228
	617.332	0.001289	0.001333	0.001506			617.332	0.001506	0.001094	0.001278
	611.492	0.001316	0.001229	0.001571			611.492	0.001571	0.001163	0.001119
	605.634	0.001172	0.001077	0.001643			605.634	0.001643	0.00116	0.001179
	599.757	0.001203	0.001028	0.001362			599.757	0.001362	0.001182	0.001347
	593.857	0.001083	0.001108	0.001399			593.857	0.001399	0.001059	0.001129
	587.934	0.001345	0.001107	0.001359			587.934	0.001359	0.001067	0.001099
	581.987	0.001355	0.001168	0.001335			581.987	0.001335	0.000922	0.001377
	576.012	0.00116	0.001255	0.001365			576.012	0.001365	0.001141	0.001426
	570.009	0.001156	0.001118	0.001428			570.009	0.001428	0.001356	0.001149
	563.976	0.001217	0.001095	0.00151			563.976	0.00151	0.001182	0.000941
	557.91	0.00119	0.001316	0.00142			557.91	0.00142	0.000977	0.001089
	551.81	0.001187	0.001109	0.001393			551.81	0.001393	0.001142	0.001297
	545.675	0.001178	0.001298	0.001571			545.675	0.001571	0.00099	0.001238
	539.503	0.001161	0.001382	0.001661			539.503	0.001661	0.001	0.001089
	533.291	0.001225	0.00118	0.001463			533.291	0.001463	0.001149	0.001
	527.038	0.001181	0.001171	0.001393			527.038	0.001393	0.001119	0.001248
	520.743	0.001094	0.001	0.001469			520.743	0.001469	0.001115	0.001288
	514.403	0.001189	0.001101	0.001134			514.403	0.001134	0.001056	0.00101
	508.017	0.001216	0.001019	0.001387			508.017	0.001387	0.00104	0.001179
	501.583	0.001141	0.001091	0.001563			501.583	0.001563	0.001151	0.001129
	495.1	0.001258	0.00106	0.001314			495.1	0.001314	0.001165	0.001456
	488.565	0.001197	0.001225	0.001255			488.565	0.001255	0.001164	0.00099
	481.976	0.001213	0.001014	0.00134			481.976	0.00134	0.001081	0.001297
	475.333	0.001186	0.001082	0.001267			475.333	0.001267	0.00103	0.001179
	468.633	0.001219	0.001203	0.001306			468.633	0.001306	0.000932	0.001208
	461.875	0.001286	0.001109	0.001657			461.875	0.001657	0.001192	0.00107
	455.056	0.001307	0.001082	0.001328			455.056	0.001328	0.001131	0.001307
	448.175	0.001239	0.001249	0.00123			448.175	0.00123	0.001182	0.00108
	441.23	0.001231	0.001111	0.0014			441.23	0.0014	0.001064	0.00108
	434.22	0.001125	0.001073	0.001437			434.22	0.001437	0.001106	0.001357
	427.143	0.001131	0.001054	0.001309			427.143	0.001309	0.001074	0.001258
	419.996	0.001133	0.001185	0.001636			419.996	0.001636	0.001101	0.001228
	412.779	0.001106	0.001172	0.001307			412.779	0.001307	0.00096	0.001169
	405.489	0.001166	0.001213	0.001402			405.489	0.001402	0.001049	0.000921
	398.124	0.001024	0.001049	0.00125			398.124	0.00125	0.000894	0.001278
	390.684	0.001124	0.001179	0.001279			390.684	0.001279	0.000867	0.000941
	383.166	0.001082	0.001082	0.001567			383.166	0.001567	0.001094	0.001496
	375.568	0.001139	0.001141	0.001429			375.568	0.001429	0.001166	0.000961
	367.888	0.001192	0.001198	0.001133			367.888	0.001133	0.001045	0.00103
	360.126	0.00114	0.001113	0.001272			360.126	0.001272	0.001191	0.00108
	352.278	0.001161	0.001115	0.001207			352.278	0.001207	0.001029	0.001208
	344.344	0.00129	0.001137	0.001361			344.344	0.001361	0.000953	0.001139
	336.322	0.00098	0.001097	0.001502			336.322	0.001502	0.001069	0.001169
	328.209	0.001197	0.001001	0.001266			328.209	0.001266	0.001093	0.000931
	320.004	0.000914	0.001004	0.001337			320.004	0.001337	0.001103	0.001208
	311.706	0.001089	0.001108	0.001218			311.706	0.001218	0.001118	0.000881
	303.312	0.00115	0.001028	0.001328			303.312	0.001328	0.001155	0.001139
	294.821	0.001174	0.001083	0.001464			294.821	0.001464	0.001072	0.000872
	286.231	0.001232	0.001083	0.001337			286.231	0.001337	0.000973	0.001129
	277.54	0.001061	0.001028	0.001207			277.54	0.001207	0.001045	0.001278
	268.747	0.001041	0.001168	0.001492			268.747	0.001492	0.001073	0.001189
	259.849	0.001051	0.001043	0.001171			259.849	0.001171	0.000789	0.001109
	250.845	0.001055	0.000818	0.001414			250.845	0.001414	0.001009	0.001109
	241.734	0.001202	0.001121	0.00146			241.734	0.00146	0.001098	0.00107
	232.513	0.001107	0.000916	0.001348			232.513	0.001348	0.001072	0.001099
	223.181	0.001042	0.001246	0.001235			223.181	0.001235	0.001193	0.00107
	213.735	0.000917	0.001019	0.001196			213.735	0.001196	0.001115	0.000832
	204.175	0.001108	0.000996	0.001192			204.175	0.001192	0.001089	0.00102
	194.498	0.001032	0.000967	0.001127			194.498	0.001127	0.001093	0.00108
	184.703	0.001134	0.001051	0.001379			184.703	0.001379	0.00099	0.001
	174.788	0.001147	0.000905	0.001428			174.788	0.001428	0.001129	0.001
	164.751	0.001093	0.00114	0.001212			164.751	0.001212	0.000969	0.001218
	154.59	0.000964	0.001086	0.001209			154.59	0.001209	0.00089	0.000852
	144.304	0.000966	0.000773	0.00119			144.304	0.00119	0.000925	0.001159
	133.891	0.001077	0.000902	0.001309			133.891	0.001309	0.001052	0.00101
	123.349	0.001105	0.000904	0.001366			123.349	0.001366	0.001062	0.000812
	112.676	0.000973	0.001122	0.001153			112.676	0.001153	0.000848	0.000971
	101.87	0.000857	0.00099	0.000999			101.87	0.000999	0.000807	0.000901
	90.9309	0.000915	0.001135	0.001165			90.9309	0.001165	0.000925	0.001089
	79.8555	0.000973	0.000883	0.000833			79.8555	0.000833	0.000869	0.00107
	68.6423	0.000978	0.000764	0.001294			68.6423	0.001294	0.001096	0.00102
	57.2897	0.000921	0.000875	0.001243			57.2897	0.001243	0.000809	0.001149
	45.7958	0.00077	0.00095	0.000966			45.7958	0.000966	0.000992	0.000911
	34.159	0.000945	0.001026	0.001024			34.159	0.001024	0.000969	0.000822
	22.3774	0.000764	0.000575	0.000864			22.3774	0.000864	0.000888	0.000981

## Sheet: Fig. 5J
Cells with foci (%)				Two-way ANOVA			Two-way ANOVA			Two-way ANOVA
Vector	hipH	hipH+dosC	hipH+dgcZ	Vector vs hipH			hipH vs hipH+dosC			hipH vs hipH+dgcZ
0.202634	7.05726	0.883281	0.211864	P Value	Summary		P Value	Summary		P Value	Summary
0.45819	9.50103	1.27932	0.666667	0.0103	*		0.0079	**		0.0088	**
0.225225	9.99075	1.84382	0.510204
